# Supplementary material for: Computational Probing the Methylation Sites Related to EGFR Inhibitor-Responsive Genes
Source: MDPI journal article supplement (doi:10.3390/biom11071042), 2021-07-16
Supplement: s1 [file s1]

## Supplementary Material

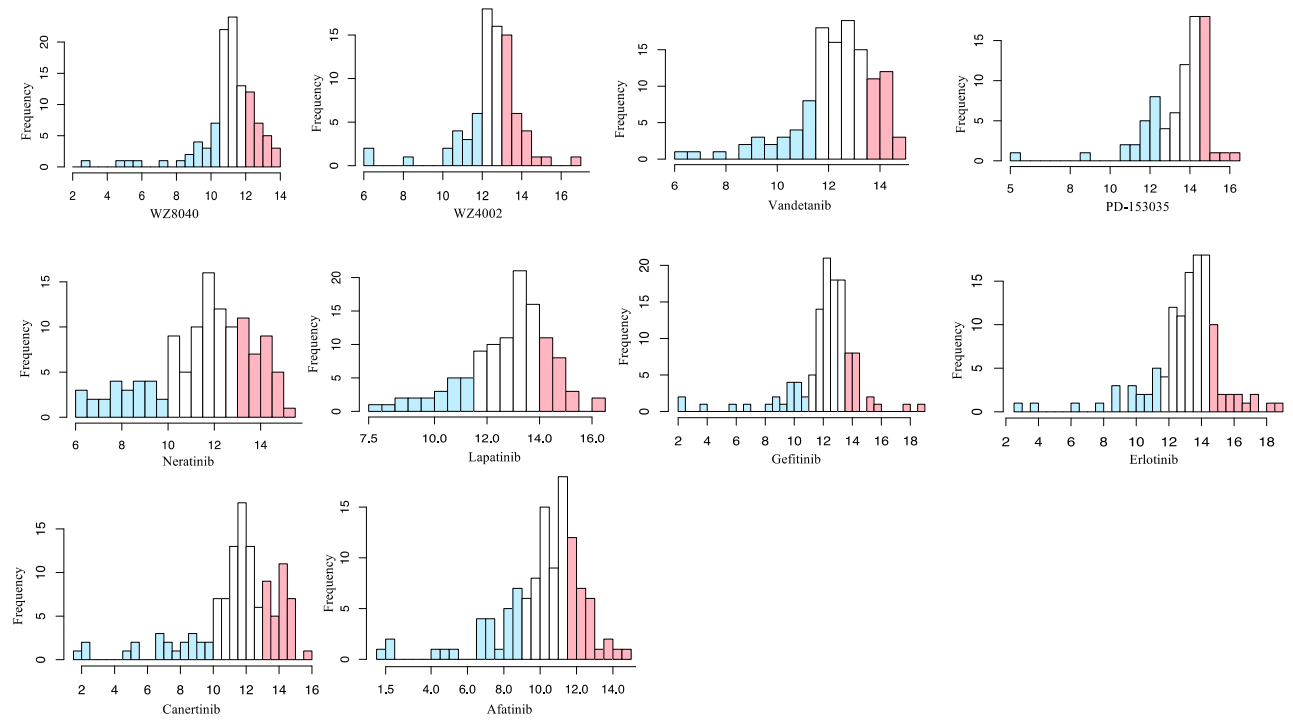

**Supplementary Figure S1.** According to the experimentally measured AUCDR data of EGFR inhibitors, sensitive or resistant samples were classified, and 10 EGFR inhibitors were considered respectively.
