# Supplementary material for: Computational Probing the Methylation Sites Related to EGFR Inhibitor-Responsive Genes
Source: Biomolecules. 2021 Jul 16;11(7):1042. doi: 10.3390/biom11071042 (PMC8302001; doi:10.3390/biom11071042)
Supplement: Supplementary file 1 [file biomolecules-11-01042-s001.zip › supplementary Table.xlsx]

## Sheet: Description of table
sheet 1: the description of the supplement table of each sheet
sheet 2: for each of the 10 EGFR inhibitors, based on differential expression analysis and the constructed lasso model, the genes and methylation sites that may have regulatory relationships are predicted.
sheet 3: the predicted methylation sites associated with WZ8040 drug responsive-gene were located in promoter region, enhancer region or TFBS region, respectively.
sheet 4: the predicted methylation sites associated with WZ4002 drug responsive-gene were located in promoter region, enhancer region or TFBS region, respectively.
sheet 5: the predicted methylation sites associated with Vandetanib drug responsive-gene were located in promoter region, enhancer region or TFBS region, respectively.
sheet 6: the predicted methylation sites associated with PD-153035 drug responsive-gene were located in promoter region, enhancer region or TFBS region, respectively.
sheet 7: the predicted methylation sites associated with Neratinib drug responsive-gene were located in promoter region, enhancer region or TFBS region, respectively.
sheet 8: the predicted methylation sites associated with Lapatinib drug responsive-gene were located in promoter region, enhancer region or TFBS region, respectively.
sheet 9: the predicted methylation sites associated with Gefitinib drug responsive-gene were located in promoter region, enhancer region or TFBS region, respectively.
sheet 10: the predicted methylation sites associated with Erlotinib drug responsive-gene were located in promoter region, enhancer region or TFBS region, respectively.
sheet 11: the predicted methylation sites associated with Canertinib drug responsive-gene were located in promoter region, enhancer region or TFBS region, respectively.
sheet 12: the predicted methylation sites associated with Afatinib drug responsive-gene were located in promoter region, enhancer region or TFBS region, respectively.

## Sheet: Genes and methylation sites
Table 1. Genes and methylation sites that may be involved in regulatory relationship
Drug	Gene	Methylation site
WZ8040	EMP3	19:58607451
Vandetanib	THRB	3:42242397; 3:42242414
PD-153035	C19orf33	19:17918738; 19:17918739; 19:17918741; 19:17918748
	SPHK1	17:1304281; 17:1304286
	ANXA6	5:70750527; 5:70750530
	MBP	18:12375949
Lapatinib	SPARC	5:68711681
	MARVELD2	5:68711681
Gefitinib	FXYD3	19:17931784; 19:51519187; 19:51519221; 19:51519225;19:51519227; 19:51519243; 19:51519342; 19:51519351
	SH2D3A	19:51519187
	KLK6	19:51519187; 19:51519221; 19:51519225
Erlotinib	MACF1	1:110766454; 1:247496054
	CGN	1:249143666
	C1orf106	1:247496054; 1:247496059
	LRRC8E	19:589071
Canertinib	CBLC	19:51519187; 19:51519221; 19:51519225; 19:51519227;19:51519243
	KLK6	19:51519187; 19:51519221; 19:51519225; 19:51519227
	LRG1	19:51519187

## Sheet: WZ8040
	Responsive genes		gene	locus	promoter						gene	locus	enhancer				gene	locus	TFBS
1	HECW1		TMEM176A	7:150496855;7:150496872;7:150496965;7:150496970;7:150496975;7:150496978	chr7:150495853-150497853						PRSS3	9:33750377;9:33750402;9:33750403	chr9:33749843-33754000				EGR1	5:137610319;5:137610321;5:68462690;5:68462711	chr5:137610118-137610383;chr5:137610122-137610398;chr5:137610128-137610368;chr5:137610194-137610421;chr5:68462635-68462796
2	TMEM176A		PRSS21	16:2865376;16:2865377;16:2865396;16:2865452	chr16:2865163-2867163						DKK3	11:12030722;11:12030743;11:12030748	chr11:12029801-12030783				NFATC1	18:12431241	chr18:12430657-12431253
3	SLC7A2		PRSS3	9:33750377;9:33750402;9:33750403	chr9:33748463-33750463;chr9:33748818-33750818						LAMA1	18:7117556;18:7117558;18:7117561;18:7117562;18:7117580	chr18:7116996-7118357
4	PLXND1		SYT13	11:45308239	chr11:45307884-45309884						NPDC1	9:137230496;9:137230505;9:137230516;9:137230578;9:137230579	chr9:137221486-137232704
5	BZRAP1		DKK3	11:12030722;11:12030743;11:12030748	chr11:12030186-12032186;chr11:12030629-12032629						RBM24	6:17280551;6:17280572;6:17280745;6:17280749;6:17280766;6:17280768;6:17280926	chr6:17276504-17284100
6	CRLF1		PTPRU	1:29562713	chr1:29561027-29563027						MUC5B	11:1219627;11:1219630;11:1219708;11:1219755;11:1219807	chr11:1218977-1220654
7	CDKL3		GSTO2	10:106034772	chr10:106032886-106034886						ATP8A1	4:42658136;4:42658280	chr4:42653499-42658910
8	PRSS21		RASAL2	1:178062466;1:178062687	chr1:178060863-178062863						MAP1B	5:72526067;5:72526086;5:72526173;5:72526174	chr5:72524836-72526883
9	PAX6		CACNG4	17:64959748	chr17:64958979-64960979						B4GALNT1	12:57869274;12:57869277	chr12:57868347-57870385
10	BAIAP3		TPTEP1	22:17082038;22:17082042;22:17082046	chr22:17080800-17082800						CDH24	14:23057583;14:23057938;14:23057952;14:23057953	chr14:23056110-23059083
11	IL32		GALNT16	14:69726314;14:69726319	chr14:69724680-69726680						SLC27A3	1:153698943	chr1:153696747-153699999
12	TRAF3IP3		PLCB4	20:9048375;20:9048384;20:9048434;20:9049134;20:9049160	chr20:9047700-9049700						GRHL3	1:24195095	chr1:24195070-24196200
13	FUZ		SALL1	16:51186261;16:51186267;16:51186282;16:51186287	chr16:51184508-51186508;chr16:51185183-51187183						ZNF362	1:33220274;1:33220437	chr1:33218780-33222501
14	PRSS3		TMEM176B	7:150498670;7:150498755;7:150498760	chr7:150497621-150499621;chr7:150498448-150500448						FBXO27	19:39052510	chr19:39052321-39054664
15	HIVEP2		NPDC1	9:139940788;9:139940797;9:139940810	chr9:139940676-139942676						SCNN1D	1:1202999;1:1203051;1:1246884;1:1246885	chr1:1196868-1204856;chr1:1243587-1249751
16	CNTN1		ABCC3	17:48711070;17:48711239;17:48711256	chr17:48710217-48712217						IL15	4:141294649;4:141294667	chr4:141294293-141294712
17	SYT13		RBM24	6:17280551;6:17280572;6:17280745;6:17280749;6:17280766;6:17280768;6:17280926	chr6:17279808-17281808;chr6:17280294-17282294						TERT	5:1251868;5:1251878	chr5:1250842-1253076
18	SAMD4A		WLS	1:68698500;1:68698507	chr1:68698229-68700229;chr1:68698284-68700284						IGF2	11:2032010	chr11:2026436-2032785
19	OSBPL5		PTK2B	8:27182553;8:27182906	chr8:27180995-27182995;chr8:27181080-27183080						SERPINB9	6:2903298;6:2903309;6:2903526;6:2903530;6:2903533	chr6:2897633-2903916
20	CPS1		BMP4	14:54421574;14:54421578;14:54421579	chr14:54421270-54423270						IRX2	5:2751705;5:2751711	chr5:2746360-2753888
21	NLRP2		MMP24-AS1	20:33866726	chr20:33865960-33867960						PTPRM	18:7567799;18:7567804;18:7567911;18:7567917;18:7568794;18:7568800;18:7568808	chr18:7565980-7569472
22	DEF6		HOXD9	2:176986201;2:176986202;2:176987073;2:176987081;2:176987087;2:176987089;2:176987093;2:176987098;2:176987245;2:176987368;2:176987383;2:176987404	chr2:176985412-176987412						HOXB2	17:48503182;17:48503187	chr17:48503034-48504675
23	FAS		HOXD10	2:176979604;2:176979684;2:176979756;2:176979767;2:176979774;2:176979781;2:176979788;2:176979797	chr2:176979491-176981491						DLGAP1-AS1	18:3450245;18:3450259;18:3450279;18:3450282;18:3453126;18:3453342;18:3453343	chr18:3445791-3460212
24	KCNG1		H19	11:2019080;11:2019090;11:2019091;11:2019116;11:2019117	chr11:2019065-2021065						CALML3	10:5552970;10:5553156;10:5553181;10:5566841;10:5566862;10:5566909	chr10:5543863-5555596;chr10:5563345-5568190
25	SLC4A7		ASS1	9:133319866;9:133319871;9:133319887	chr9:133318093-133320093						SERHL2	22:42685799	chr22:42681607-42690470
26	TLL1		RFTN1	3:16555362;3:16555364	chr3:16555222-16557222						JAG2	14:105070159;14:105070404;14:105070537	chr14:105068764-105071613
27	VCAN		SPG20	13:36920919;13:36920925;13:36920933	chr13:36920646-36922646						MAPK11	22:49934917	chr22:49932908-49940000
28	FAM65A		KRBA1	7:149411703;7:149411705;7:149411715	chr7:149410101-149412101						LINC00839	10:42644668;10:42644670;10:42645385;10:42645390;10:42646212	chr10:42643876-42647808
29	CAPG		ECHDC3	10:11784141;10:11784152;10:11784233;10:11784234;10:11784253;10:11784255;10:11784270	chr10:11782355-11784355						SDHAP3	5:1594623	chr5:1593841-1595218
30	BARX2		FADS2	11:61583866	chr11:61581875-61583875						IFT140	16:2023726;16:2023729	chr16:2022442-2024771
31	CP		COL4A2	13:110958893;13:110958895;13:110958904;13:110958941;13:110958946	chr13:110957630-110959630						NHLRC1	6:18122611	chr6:18121774-18123319
32	ANO2		SLC26A10	12:58012988;12:58013110;12:58013119;12:58013120;12:58013141	chr12:58011692-58013692						S100A3	1:153507260;1:153507261	chr1:153505802-153508795
33	ROS1		DYSF	2:71692287;2:71692547;2:71692569;2:71692570;2:71692666	chr2:71691831-71693831						HIST1H2BH	6:26251516	chr6:26248916-26261823
34	CELF2		KCNK1	1:233749588;1:233749605;1:233749634;1:233749644;1:233749657	chr1:233747749-233749749						TPM2	9:35691285;9:35691292	chr9:35679739-35692495
35	DKK3		WNT10A	2:219744626;2:219744634;2:219745251	chr2:219743254-219745254						RASGEF1A	10:43332792;10:43332794;10:43332799;10:43332804	chr10:43331602-43333399
36	LIMA1		CYP27A1	2:219646460	chr2:219644471-219646471
37	SLC4A8		HERC5	4:89377912;4:89377916;4:89378046	chr4:89376267-89378267
38	LAMC3		COL6A2	21:47517355;21:47517485	chr21:47516032-47518032
39	FSTL4		ATP8B2	1:154297991;1:154298543;1:154298839;1:154298840;1:154298889	chr1:154296035-154298035;chr1:154298275-154300275
40	NNAT		THNSL2	2:88469720;2:88469730	chr2:88467813-88469813
41	PTPRN		PAM	5:102201137	chr5:102199526-102201526
42	HHAT		TACC1	8:38644248	chr8:38642721-38644721
43	GALC		FERMT3	11:63973269;11:63973270;11:63973277	chr11:63972151-63974151
44	DCBLD2		LYPD6B	2:149894472	chr2:149892980-149894980
45	USP13		ZNF773	19:58011267;19:58011268;19:58011295	chr19:58009308-58011308
46	TARBP1		PRKCA	17:64298868;17:64298874	chr17:64296925-64298925
47	YBX3		RBPMS	8:30241538	chr8:30240016-30242016
48	STYK1		DUSP2	2:96812038;2:96812044;2:96812049	chr2:96811179-96813179
49	PTPRU		F11R	1:160991529	chr1:160991133-160993133
50	COL11A1		FGFR4	5:176513660;5:176513680;5:176513686;5:176513739	chr5:176511872-176513872
51	MPC1		FBXO27	19:39523574;19:39523575	chr19:39523198-39525198
52	BCAT1		CXCL1	4:74734076;4:74734079;4:74734094;4:74735093;4:74735095;4:74735102	chr4:74733108-74735108
53	LTK		TERT	5:1295338;5:1295343;5:1295591	chr5:1295162-1297162
54	LIMCH1		HTRA1	10:124220726	chr10:124219040-124221040
55	CDON		PKIA	8:79428305;8:79428313;8:79428321;8:79428325	chr8:79426335-79428335
56	SLC12A2		SYCE1	10:135379149;10:135379151;10:135379175;10:135379176	chr10:135379138-135381138
57	FAR2		SNTB1	8:121824672;8:121824678;8:121824682	chr8:121824309-121826309
58	GSTO2		DPP10	2:115918201;2:115918383	chr2:115917512-115919512;chr2:115917683-115919683
59	TLE2		CALCB	11:15093202;11:15093278;11:15093283;11:15094993	chr11:15093145-15095145
60	SYT1		BOK	2:242497960;2:242497961	chr2:242496145-242498145
61	NAV3		CALML3	10:5566841	chr10:5564851-5566851
62	ATP11A		THBD	20:23031135;20:23031145;20:23031149	chr20:23030301-23032301
63	SPTB		ALX1	12:85673314;12:85673325;12:85673709;12:85673719;12:85673720	chr12:85672035-85674035
64	NDST1		DLK1	14:101192860;14:101192871;14:101192883;14:101192895	chr14:101191201-101193201
65	SLC6A15		PRAME	22:22901597	chr22:22900174-22902174
66	SREBF1		LINC00839	10:42970533;10:42970619;10:42970731;10:42970768;10:42970786	chr10:42968938-42970938
67	PANX2		C11orf95	11:63536544;11:63536554	chr11:63536113-63538113
68	GSDMB		GJB3	1:35246726;1:35247581;1:35247582;1:35247587;1:35247792;1:35247793	chr1:35244789-35246789;chr1:35245910-35247910
69	PTGS2		HIST1H2BH	6:26251516	chr6:26249878-26251878
70	CA12		TPM2	9:35691285;9:35691292	chr9:35690053-35692053
71	ZNF532		MROH6	8:144655680	chr8:144654928-144656928
	SRI
	SEMA3C
	RASAL2
	CACNG4
	RBMS2
	RARB
	PPP1R12B
	TPTEP1
	ZMAT5
	COCH
	GSTZ1
	GALNT16
	REC8
	NFATC4
	PLTP
	SLCO4A1
	ISM1
	SLC52A3
	PLCB4
	ZNF516
	LAMA1
	NALCN
	CAB39L
	KPNA3
	HSF4
	CBLN1
	HAS3
	COTL1
	NME4
	ABCC1
	RHBDL1
	SALL1
	RHOV
	JPH1
	SQLE
	ERI1
	CGB
	TNNT1
	OLFM2
	ZNF419
	CCNE1
	CNTD2
	TGFB1
	CD79A
	CLEC11A
	RAB3D
	FAM83E
	SCN1B
	TFPI2
	CPVL
	GRB10
	COBL
	EPHB6
	AHR
	TMEM176B
	SLC1A1
	FKTN
	TLE4
	RLN2
	NPDC1
	PTGDS
	PALD1
	C10orf54
	SPOCK2
	ACTA2
	DKK1
	PBLD
	RAPGEFL1
	ENO3
	RASD1
	ICAM2
	LGALS3BP
	CCL2
	ABCC3
	SLC9A3R1
	PHOX2B
	INPP4B
	GAB1
	ANXA10
	C11orf63
	B3GAT1
	VWA5A
	DTX4
	ST3GAL4
	FOLR1
	ARHGEF17
	PPFIBP1
	KRT18
	WNT5B
	OAS2
	PTPN6
	SLCO1B3
	NEDD9
	RBM24
	CAP2
	PHACTR2
	GMDS
	LAMA4
	SPARC
	PCDHB5
	RBP1
	HES1
	GNB4
	PLSCR4
	MAPKAPK3
	TNNC1
	CCL20
	ITGA4
	CLIP4
	EFEMP1
	FN1
	IGFBP5
	MLPH
	WIPF1
	KISS1R
	RHOU
	WLS
	RGS2
	OLFML3
	RP11-268J15.5
	NID1
	RIMS3
	RGS4
	TXNIP
	SLC2A1
	FAAH
	MUC5B
	CTSD
	RARRES1
	CCND2
	PGF
	IFI27L2
	LTBP2
	CNRIP1
	OGFRL1
	HOXB8
	DUSP1
	DNAJC15
	TGFBI
	EGR1
	GLT8D2
	CLU
	PTK2B
	TRIM6
	ZNF549
	ZNF211
	SFTPA1
	SPRYD7
	SLC36A1
	BATF3
	MXD4
	DAW1
	OBSL1
	ENKD1
	SDC4
	KCNK15
	ATP8A1
	PRICKLE4
	UNC5CL
	MOCS1
	SPDEF
	HIST1H3B
	RUNX2
	BMP4
	C1orf61
	MMP24-AS1
	IGFLR1
	WNK4
	IFI6
	AIF1L
	TSPAN8
	PTPRB
	GNAI1
	ZFP36
	APOL3
	DOCK4
	STRIP2
	CHN1
	HOXD9
	HOXD10
	IVD
	PALLD
	MMP28
	KLK10
	CDO1
	KIF1A
	ZSWIM6
	OLFM1
	H19
	ASS1
	ZNF236
	ULBP2
	NFATC1
	RFTN1
	ANO1
	MAP1B
	CLUHP3
	LANCL2
	MATN2
	NES
	MTL5
	VSTM2L
	BHMT2
	SPG20
	POSTN
	RARRES3
	C1QTNF6
	KRBA1
	TMTC1
	CTIF
	CAMK1
	GSTM1
	NOTCH2
	ECHDC3
	SPOCD1
	CYP2J2
	SLC43A3
	FADS2
	TCN1
	GGACT
	COL4A2
	NREP
	CD36
	CGA
	EHF
	B4GALNT1
	SLC26A10
	DYSF
	CCDC102A
	AGT
	KCNK1
	WNT10A
	TMBIM1
	CYP27A1
	RNASEH2B
	LRCH1
	ITM2B
	EDNRB
	TMOD1
	CDK5RAP2
	GARNL3
	CTSV
	TMEM261
	KIF13A
	SLC22A23
	TUBB2B
	SYTL2
	SULF1
	TMPRSS4
	C11orf70
	THBS1
	PARP6
	GIPC2
	ARHGAP29
	CGREF1
	CYP1B1
	SHF
	HERC5
	PRKG2
	FGF5
	MAPK8IP3
	KIAA1644
	B4GALNT3
	ERP27
	RBP5
	ITGB7
	GALNT6
	CSAD
	ESD
	CDH24
	CBLN3
	TSSK4
	NOVA1
	JDP2
	SLC27A2
	CYP1A1
	MCTP2
	CLEC18B
	CMTM3
	SGSM2
	SAT2
	SECTM1
	COL6A1
	COL6A2
	EMP3
	RCN3
	C1orf216
	PTPRF
	SLC44A3
	XCL1
	ABL2
	RGS16
	HMCN1
	RGL1
	SEMA6C
	HORMAD1
	SUSD4
	ATP8B2
	SLC27A3
	EPHX1
	THNSL2
	FAHD2B
	ANKMY1
	STAC
	PTPRG
	PHLDB2
	TM4SF19
	SNCA
	NKD2
	PAM
	ZNF300
	DOK3
	SLC18B1
	IGFBP3
	CSGALNACT1
	TACC1
	TRIM55
	MAL2
	FAM83A
	NFIB
	CDKN2B
	CDKN2A
	LCN2
	C10orf11
	SLC43A1
	PTPRJ
	TAGLN
	FERMT3
	DOC2A
	ARID5B
	LYPD6B
	CRIM1
	ITPR1
	CACNA2D4
	KCTD14
	CCDC3
	EPS8
	TMEM45B
	GFRA1
	CCDC74B
	SPOCK1
	JMY
	ZNF773
	GJA1
	FARP1
	ZNF117
	RAB3C
	PLOD2
	ACOXL
	BMP6
	NMRAL1
	ADPRHL1
	JAZF1
	KCTD15
	CHST9
	C16orf74
	ABI3BP
	PRKCA
	UCHL1
	LY96
	CXADR
	CXXC1
	VOPP1
	PROM2
	HSPA13
	KDM8
	DEPTOR
	FMN2
	SLC26A2
	FAM161B
	KCNMA1
	BATF
	SH3RF2
	MPV17L
	SST
	RBPMS
	SUSD3
	CLEC18A
	CLEC18C
	CREB3L1
	KRTCAP3
	DUSP2
	GRHL3
	XDH
	AHCYL2
	F11R
	IFNGR2
	IGF2BP1
	ACTC1
	SIM2
	ZFYVE28
	RGS12
	ZNF362
	TFF3
	TFF2
	C9orf116
	AZGP1
	FGFR4
	FBXO27
	CCL5
	SHANK1
	TNFSF13
	CCDC78
	AK4
	SDC3
	SCNN1D
	NTNG1
	C1orf115
	ADCK3
	INHBB
	S100A9
	ALPP
	TGFBR2
	FBLN2
	SERPINI1
	NUAK2
	IFI16
	CADPS
	ADAMTS9
	PTX3
	IL17RE
	CXCL3
	CXCL1
	RYK
	RPL39L
	MFI2
	INTU
	HSPA4L
	HMGB2
	CEP44
	IL15
	FAM160A1
	ITGA2
	F2RL2
	SPINK1
	SERINC5
	TERT
	TMEM200A
	RAET1E
	KIAA1324L
	USP49
	CTHRC1
	MAMDC2
	ALDH1A1
	AQP3
	ANXA8
	ZNF503
	ZNF219
	GYLTL1B
	HTRA1
	SPRED1
	AMN
	PPFIBP2
	CYB5R2
	ST5
	RIMKLB
	RRAD
	CHRFAM7A
	NNMT
	KIF7
	IGF2
	MYO5B
	CACNB3
	ZNF528
	PPP1R14A
	LY6D
	KLK6
	KRT80
	RP11-25K19.1
	SCARA3
	SMIM4
	CMAHP
	SERINC2
	IL7R
	SFTPB
	SLC35G2
	INPP5D
	IRS1
	PARM1
	AFAP1L2
	CPT1C
	RAB3B
	EFNA1
	SDC2
	ZEB2
	HEXDC
	ROBO1
	NLGN2
	SERPINB9
	CDH2
	IRX2
	KCNS3
	MTSS1
	PKIA
	FAM86JP
	CDC42BPG
	TMEM37
	CHST11
	LPAR3
	ECEL1
	FGG
	RP11-443P15.2
	SYCE1
	SCG2
	KRCC1
	SLFN12
	CALB2
	SNTB1
	ATOH1
	CES3
	GXYLT2
	GLRX
	SYT12
	SNCG
	FAM86B3P
	SAA1
	AGR3
	ZNF417
	PTPRM
	CCDC106
	2021-03-10
	HOXB2
	ANKRD36C
	IL20RB
	CD248
	CHST2
	CADM2
	GOLGA8A
	TP53I11
	DPP10
	P2RY2
	CALCB
	LRRN1
	NUPR1
	GPX2
	PLA2G16
	PRR15
	BDNF
	BOK
	BASP1
	C8orf4
	MTX3
	ACER2
	DLGAP1-AS1
	CTD-2201E18.3
	AC108142.1
	PARD6G
	CALML3
	DNAJC22
	SLC25A20
	RP11-169K16.8
	THBD
	DPM3
	MKRN3
	DNHD1
	LACC1
	PCED1B
	RP11-1319K7.1
	LYNX1
	ALX1
	HCLS1
	C11orf71
	NRIP1
	TSPYL5
	CHRM4
	S1PR5
	ARSJ
	HOXC10
	GREM2
	CUEDC1
	D2HGDH
	GPR137C
	ZNF467
	MX2
	SERHL2
	DGCR6
	PSG9
	LHFP
	KREMEN1
	AIFM3
	DNAH2
	KCNQ3
	FAM132A
	POU6F1
	ZDHHC23
	SLIT3
	WDR27
	PROS1
	SNN
	JAG2
	USP18
	LINC00313
	NOTUM
	SFTPA2
	TCN2
	MAPK11
	FAM174B
	DLK1
	PRAME
	LINC00839
	SDHAP3
	RASA3
	GPAT2
	BACE1
	PDE2A
	CYP27C1
	ZSCAN30
	KRT16
	PDZD7
	TNFRSF18
	ESPN
	RP11-187C18.3
	BCAM
	IFT140
	NHLRC1
	C17orf97
	SAMD11
	TMSB4XP8
	S100A3
	RAB42
	C11orf95
	AGRN
	HNRNPU-AS1
	IGFL1
	ZP3
	COL25A1
	S100A16
	FAM221A
	FZD9
	ZNF548
	GJB3
	S100A14
	CXCL17
	ZNF699
	S100A4
	SRGAP3
	SFTA2
	ZNF493
	CD55
	EVL
	NPIPB15
	ZNF605
	SULT1A1
	TPK1
	MME
	MMP1
	HIST3H2BB
	SLC39A10
	ZNF100
	ANXA6
	ZNF772
	SERPINA1
	C6orf141
	SYNGAP1
	SLC22A5
	VEPH1
	OGDHL
	HIST1H2BH
	PDGFA
	DPP4
	PARVA
	S100A6
	AGAP9
	DSCR8
	AKR1B10
	FKBP1C
	RP11-98J23.2
	CARD11
	PEG3
	ZNF26
	TPM2
	B3GNT6
	ATL1
	C1orf228
	ITGBL1
	F5
	RASSF9
	SCAMP5
	CES1
	RASGEF1A
	RNU1-59P
	CAPN8
	SERTAD4-AS1
	C6orf99
	RAET1G
	FAM72C
	HIST2H3PS2
	RBM20
	SNHG5
	TNRC6C-AS1
	HLA-DRA
	AGER
	LY6G5C
	ZNF814
	HLA-C
	HLA-F
	MROH6
	ZNF155
	PSG5
	PRSS1
	RPSAP58
	MT1M
	KRT6A
	KRT81
	ATP6AP1L
	XXbac-BPG248L24.12
	RP1-313I6.12
	RP11-284F21.9
	RP11-574K11.29
	RP11-465B22.8
	RP11-428J1.5
	RP11-284F21.10
	RP11-54O7.17
	AFAP1-AS1
	RP11-347I19.8
	RP5-1159O4.1

## Sheet: WZ4002
	Responsive genes		gene	locus	promoter							gene	locus	enahncer					gene	locus	TFBS
1	ENPP4		TMEM176A	7:150496855;7:150496872;7:150496965	chr7:150495853-150497853							SH3YL1	2:214422	chr2:214401-214600					MYC	8:110552614;8:110552621;8:131455373;8:143201205;8:143201212;8:143201213;8:145115962;8:145116011;8:145158414;8:145158432;8:146013229;8:146013230;8:146013237;8:55014844;8:77593249	chr8:110551266-110552967;chr8:110551274-110553027;chr8:110551419-110552985;chr8:110551492-110552994;chr8:110551525-110553038;chr8:110551652-110552893;chr8:110551655-110552873;chr8:110551815-110553091;chr8:110551960-110552671;chr8:110552000-110552662;chr8:110552042-110553112;chr8:110552066-110552681;chr8:110552119-110552887;chr8:110552138-110552659;chr8:110552172-110552772;chr8:110552217-110552627…
2	SEMA3F		PRSS21	16:2865376;16:2865377;16:2865396;16:2865452	chr16:2865163-2867163							CNN2	19:1259300	chr19:1236312-1277405					FOS	14:24801501;14:45722315	chr14:24801434-24801715;chr14:24801459-24801659;chr14:24801497-24801743;chr14:45722307-45722899
3	TMEM176A		PTPRU	1:29562713	chr1:29561027-29563027							EVC	4:5710035;4:5710040	chr4:5707481-5713482					JUN	1:100818309;1:100818320;1:201475946;1:22379685;1:225965337;1:228676132	chr1:100816115-100819765;chr1:201475713-201476751;chr1:22377777-22381332;chr1:225963858-225966969;chr1:225964869-225965621;chr1:225965250-225965480;chr1:228672601-228678958
4	SLC7A2		TRIB2	2:12855168;2:12855232	chr2:12854997-12856997							DSP	6:7541549;6:7541569	chr6:7540481-7555695
5	YBX2		NEBL	10:21463524;10:21463542;10:21463568;10:21463741	chr10:21463116-21465116							SUSD2	22:24181090	chr22:24180296-24182200
6	CCL26		PKP1	1:201252201;1:201252216;1:201252360;1:201252361;1:201252381;1:201252544	chr1:201250579-201252579							PYCARD	16:31213445;16:31213568;16:31213571;16:31213578;16:31213579	chr16:31213140-31216382
7	PRSS21		FXYD5	19:35645096;19:35645284;19:35645290	chr19:35643624-35645624;chr19:35643671-35645671;chr19:35643844-35645844							AMH	19:2252082;19:2252086;19:2475641;19:2475658;19:2478310	chr19:2247129-2254667;chr19:2474623-2480246
8	IL32		RGS17	6:153453031;6:153453035	chr6:153452389-153454389							FSD1	19:4360306;19:4360307	chr19:4359474-4362963
9	FYN		ECHDC1	6:127664268;6:127664273;6:127664278;6:127664282	chr6:127663552-127665552							PTPRS	19:5340805;19:5340808;19:5340810	chr19:5340281-5341359
10	SYT7		DSP	6:7541549;6:7541569	chr6:7539869-7541869							MPDZ	9:13279635;9:13279637;9:13279639	chr9:13277564-13280297
11	PLAUR		TSPAN15	10:71210651	chr10:71209225-71211225							GLIPR2	9:36035988;9:36165226;9:36165384;9:36165385	chr9:36035949-36040549;chr9:36160874-36167199
12	DCN		TPTEP1	22:17082038;22:17082042;22:17082046	chr22:17080800-17082800							CDKN1A	6:36649530;6:36650734;6:36650742	chr6:36649402-36652995
13	SEMA3B		MYL9	20:35168933;20:35169720;20:35169721;20:35169777;20:35169784	chr20:35167886-35169886							TNFSF9	19:6528944;19:6529001;19:6529026;19:6529027;19:6529035;19:6530759;19:6530769;19:6661025;19:6661073	chr19:6527568-6533719;chr19:6660377-6664526
14	ALOX5		CPPED1	16:12899245	chr16:12897744-12899744							DLG4	17:7165023;17:7165116;17:7165121	chr17:7165001-7165201
15	WWTR1		DMPK	19:46283705;19:46283896	chr19:46282877-46284877;chr19:46283861-46285861							LOXL2	8:23084101	chr8:23082967-23085800
16	PHLDB1		MPDZ	9:13279635;9:13279637;9:13279639	chr9:13279563-13281563							GRB7	17:40541098;17:40541120	chr17:40528730-40544482
17	PLEKHB1		CCND1	11:69454802;11:69454823	chr11:69453872-69455872							VAV1	19:5799379	chr19:5798947-5799863
18	NLRP2		LOXL3	2:74782488;2:74782559;2:74782567	chr2:74781091-74783091							IFITM3	11:318269;11:355581;11:355711	chr11:311376-318360;chr11:352202-358026
19	GRAMD1B		WLS	1:68698500;1:68698507	chr1:68698229-68700229;chr1:68698284-68700284							MYO10	5:16936282;5:16936287;5:16936408;5:16936414;5:16936419	chr5:16930760-16937677
20	DEF6		ELOVL4	6:80657516;6:80657542;6:80657566	chr6:80657315-80659315							TERT	5:1251868;5:1251878	chr5:1250842-1253076
21	PLEKHO1		CNNM1	10:101088828;10:101088840	chr10:101086855-101088855							FOXQ1	6:1316786	chr6:1309797-1316944
22	KCNG1		CRISPLD1	8:75896575;8:75896586;8:75896591	chr8:75894707-75896707							ATF7IP2	16:10275487;16:10275494;16:10275499	chr16:10275004-10276285
23	SLAMF7		HIST1H2BJ	6:27101601	chr6:27100575-27102575							LGALS9	17:27331383;17:27332069	chr17:27331315-27334627
24	SH3YL1		TNFSF9	19:6529026;19:6529027;19:6529035;19:6530759;19:6530769	chr19:6529009-6531009							SERPINB9	6:2903298;6:2903309;6:2903526	chr6:2897633-2903916
25	FLT4		PXDN	2:1749394;2:1749712;2:1749730;2:1749768	chr2:1748291-1750291							IRX2	5:2751705;5:2751711;5:2751714	chr5:2746360-2753888
26	CDH10		ASS1	9:133319866;9:133319871	chr9:133318093-133320093							FUT3	19:5804886;19:5804899;19:5804929	chr19:5803601-5807021
27	TNC		PPP1R1B	17:37782381;17:37783855	chr17:37781176-37783176;chr17:37782750-37784750							NINJ2	12:751142;12:751157;12:751167;12:751168;12:751689;12:751692;12:751771	chr12:749166-756118
28	CAPG		KHDRBS3	8:136467876;8:136467881;8:136467891;8:136467999;8:136468000	chr8:136467715-136469715							EVC2	4:5710035;4:5710040;4:5710045;4:5710654;4:5710671;4:5710679	chr4:5707481-5713482
29	ZIC2		RAMP1	2:238768081;2:238768098;2:238768102	chr2:238766186-238768186							PTPRM	18:7567799;18:7567804;18:7567911;18:7567917;18:7568794;18:7568800;18:7568808;18:7568824;18:7568829	chr18:7565980-7569472
30	EPHA3		SPG20	13:36920919;13:36920925;13:36920933;13:36920934	chr13:36920646-36922646							DLGAP1-AS1	18:3450245;18:3450259;18:3450279;18:3450282;18:3453126;18:3453342	chr18:3445791-3460212
31	CP		PDE6B	4:617701;4:617845	chr4:617362-619362							TMEM52	1:1896554;1:1896556	chr1:1888049-1897969
32	ADAMTS6		FADS2	11:61583866;11:61583872	chr11:61581875-61583875							ZFP82	19:35644877;19:36128068	chr19:35641252-35645808;chr19:36127202-36129900
33	SLC4A8		COL4A2	13:110958893;13:110958895;13:110958904;13:110958941;13:110958946;13:110958956;13:110958967	chr13:110957630-110959630							CLDN7	17:7165023	chr17:7165001-7165201
34	TNIP3		PSAT1	9:80911725;9:80911736;9:80911749	chr9:80909990-80911990							ADRA2C	4:3765119	chr4:3765068-3766231
35	HOMER3		CCDC146	7:76751250;7:76751253	chr7:76749933-76751933							CEND1	11:790130	chr11:788167-791673
36	CYBA		NT5E	6:86159055;6:86159071;6:86159266;6:86159291	chr6:86157301-86159301							ANO9	11:448070;11:448076	chr11:443602-451865
37	FSTL4		GLS2	12:56882392;12:56882398;12:56882439;12:56882543	chr12:56882198-56884198							IFITM2	11:355557;11:355581;11:355692;11:355711	chr11:352202-358026
38	NNAT		KRT7	12:52626748	chr12:52624953-52626953							AFAP1	4:7940564;4:7940566;4:7940569	chr4:7936561-7942099
39	PTPRN		HERC5	4:89377912;4:89377916;4:89378046	chr4:89376267-89378267							HIST1H2BH	6:26251516	chr6:26248916-26261823
40	ATP9A		NUDT7	16:77756181;16:77756213	chr16:77754388-77756388							TPM2	9:35488186;9:35488214	chr9:35487768-35493221
41	MCOLN3		SLC39A6	18:33710881	chr18:33709357-33711357							RASGEF1A	10:43332792;10:43332794;10:43332799;10:43332804	chr10:43331602-43333399
42	TRAF1		COL6A2	21:47517355;21:47517485;21:47517512	chr21:47516032-47518032							ZNF468	19:53104362;19:53104385;19:53104425;19:53104430	chr19:53093827-53104558
43	LAMC2		THNSL2	2:88469720;2:88469730;2:88469731;2:88469736	chr2:88467813-88469813							HLA-A	6:28954293	chr6:28952675-28954799
44	RASGRF1		MYO10	5:16936408;5:16936414;5:16936419	chr5:16936385-16938385
45	SLC2A3		PAM	5:102201137	chr5:102199526-102201526
46	PTPRU		FUOM	10:135171559;10:135171564;10:135171574	chr10:135171529-135173529
47	BCAT1		ST14	11:130029439;11:130029460;11:130029475	chr11:130027681-130029681
48	AHRR		FERMT3	11:63973269;11:63973270;11:63973277	chr11:63972151-63974151
49	LIMCH1		LYPD6B	2:149894472	chr2:149892980-149894980
50	SPA17		DPYSL4	10:134000206;10:134000210;10:134000214;10:134000216	chr10:133998413-134000413
51	SLC12A2		ZNF773	19:58011267;19:58011268	chr19:58009308-58011308
52	CNN2		PCDH1	5:141258496;5:141258500	chr5:141257975-141259975
53	COL17A1		RBPMS	8:30241538	chr8:30240016-30242016
54	PRKCQ		TMEM171	5:72415570;5:72415638;5:72415665;5:72415666;5:72415668;5:72415670;5:72415680;5:72415682;5:72415687;5:72415889;5:72415894;5:72415924;5:72415931;5:72415943;5:72415962;5:72415971	chr5:72414387-72416387
55	MPPED2		STEAP2	7:89840814;7:89840824	chr7:89838999-89840999;chr7:89839173-89841173
56	CLDN18		IGFBP7	4:57976699;4:57976702;4:57976713	chr4:57976551-57978551
57	SYT1		TERT	5:1295338;5:1295343;5:1295591	chr5:1295162-1297162
58	NAV3		PRTG	15:56035638;15:56035663;15:56035805;15:56035814	chr15:56035177-56037177
59	SPTB		NPNT	4:106816439;4:106816453	chr4:106814596-106816596
60	WIPI1		ELOVL6	4:111120249;4:111120331;4:111120348	chr4:111119771-111121771;chr4:111119820-111121820
61	LMCD1		PRKCDBP	11:6341889;11:6341896	chr11:6341740-6343740
62	TRIB2		PKIA	8:79428305;8:79428313;8:79428321	chr8:79426335-79428335
63	SLC6A15		SNTB1	8:121824672;8:121824678;8:121824682	chr8:121824309-121826309
64	SPEG		EVC2	4:5710654;4:5710671;4:5710679	chr4:5710294-5712294
65	EVC		UBE2C	20:44441182;20:44441187;20:44441326;20:44441329	chr20:44439214-44441214;chr20:44439671-44441671
66	GSDMB		SFN	1:27189514	chr1:27187632-27189632
67	CA12		VWA1	1:1368976;1:1369158;1:1369572;1:1369593;1:1369594;1:1369616	chr1:1368902-1370902
68	SEMA3C		CRIP2	14:105941186;14:105941190;14:105941195;14:105941242;14:105942230;14:105942243;14:105942430;14:105942575;14:105942598;14:105942599;14:105942621	chr14:105940195-105942195;chr14:105941582-105943582
69	MCAM		RIPK4	21:43189143;21:43189144;21:43189149	chr21:43187249-43189249
70	RARB		UPP1	7:48127925;7:48127997;7:48127998	chr7:48126199-48128199;chr7:48126736-48128736;chr7:48126808-48128808;chr7:48126850-48128850
71	CST7		OAF	11:120081466;11:120081488	chr11:120079746-120081746
72	NEBL		CEND1	11:790130	chr11:790126-792126
73	SLC1A3		MUC1	1:155162716;1:155162723	chr1:155162706-155164706
74	LXN		DLK1	14:101192860;14:101192871;14:101192883;14:101192895	chr14:101191201-101193201
75	SP140		PRR5	22:45097757;22:45097768;22:45097778	chr22:45096077-45098077
76	EPB41L2		RDM1	17:34257436;17:34257462;17:34257463	chr17:34257303-34259303
77	MOXD1		PARVB	22:44419624;22:44419791;22:44419854;22:44419866;22:44419904;22:44419906;22:44419912	chr22:44418156-44420156
78	DDX43		ZFP28	19:57049676;19:57049680	chr19:57048316-57050316
79	CHRNA3		ZNF429	19:21688412	chr19:21686436-21688436
80	CROCCP3		SLC6A17	1:110693064;1:110693069;1:110693071;1:110693073;1:110693088	chr1:110691131-110693131
81	PKP1		ZNF655	7:99156074;7:99156084;7:99156097;7:99156145;7:99156158;7:99156227	chr7:99154447-99156447
82	PHLPP1		HIST1H2BH	6:26251516	chr6:26249878-26251878
83	OXCT1		LPAR1	9:113800677;9:113800682;9:113801159;9:113801189;9:113801194;9:113801207;9:113801213	chr9:113800365-113802365
84	CHMP2B		HLA-H	6:29855119	chr6:29853536-29855536
85	COL16A1		ZNF845	19:53836796;19:53836797	chr19:53835001-53837001
	CD82
	SLC25A24
	ABCB1
	EPDR1
	LAT2
	TRIP6
	TMPRSS11E
	MMP2
	EPB41L1
	FXYD5
	CDIP1
	ZBTB25
	BLVRB
	FLT3LG
	FCGBP
	NRCAM
	ITGA6
	RGS17
	UNC13D
	TGFB2
	ECHDC1
	IL11
	CREM
	DSP
	SYDE2
	TSPAN15
	H2AFY2
	MAST3
	MISP
	GSTT2
	SUSD2
	PLA2G3
	SEZ6L
	GCAT
	TPTEP1
	HMOX1
	ARSA
	PNPLA3
	RBM23
	COCH
	HIF1A
	DHRS2
	REC8
	NFATC4
	PLTP
	CDC25B
	MYL9
	CST3
	MAP1LC3A
	MYL12A
	NALCN
	MSLN
	HSF4
	CORO1A
	NDRG4
	SETD6
	CRISPLD2
	CPPED1
	TOX3
	QPRT
	PYCARD
	IQCH
	HOMER2
	BMF
	RHOV
	CALB1
	NIPAL2
	GDAP1
	NDRG1
	NEFL
	BNIP3L
	KCNN4
	FCGRT
	AMH
	DMPK
	ZNF419
	SLC1A6
	FSD1
	TGFB1
	DENND3
	MYH14
	CD79A
	ATP1A3
	PTPRS
	ZNF175
	MAST1
	RAB3A
	LSR
	CADM4
	NAMPT
	PON3
	DLX5
	DFNA5
	CAV2
	CPVL
	NPTX2
	PCOLCE
	SERPINE1
	ZNF862
	SFRP4
	AGR2
	GIMAP2
	CLIP2
	SLC1A1
	CNTNAP3
	MPDZ
	FBXW4
	DKK1
	DNAJC12
	KRT23
	ENO3
	ALDH3A1
	ICAM2
	HSD17B1
	CNTNAP1
	PTGES3L-AARSD1
	SLC9A3R1
	VTN
	PPARGC1A
	VWA5A
	CCND1
	CLEC2B
	NEDD9
	MAN1A1
	WASF1
	EYA4
	TFEB
	PTK7
	TBX18
	PCDHB2
	PDE4D
	LIFR
	DPYSL3
	FAM162A
	RBP1
	WNT5A
	COL7A1
	FRMD4B
	NEK11
	ZBTB47
	CCL20
	SLC30A3
	GRB14
	CLIP4
	LOXL3
	DOK1
	IGFBP2
	EFHD1
	MLPH
	ID2
	EPAS1
	EPHA4
	DHCR24
	GPX7
	TRIM62
	FBXO2
	WLS
	RGS2
	NID1
	SIPA1L2
	ZNF684
	ST6GALNAC5
	MFAP2
	RGS4
	GBP1
	FAAH
	F3
	LRMP
	ELOVL4
	PLAGL1
	VAMP8
	SPP1
	GDA
	KLF9
	TJP2
	NEK6
	IFI27L2
	ACOT2
	LTBP2
	FLVCR2
	TGFB3
	CNNM1
	CYSTM1
	TGFBI
	SOCS2
	SORBS3
	CRISPLD1
	RDH10
	TBX2
	ADCY7
	PLBD1
	ZNF549
	ZSCAN18
	B4GALT4
	SLITRK3
	LRIF1
	NBPF14
	HOXA7
	GLIPR2
	CNTFR
	SFTPA1
	PLAU
	SRGN
	RASSF8
	BHLHE41
	METTL21B
	G0S2
	PI3
	SLPI
	SLC12A5
	PTGIS
	KCNK15
	HIST1H2BJ
	SPDEF
	CDKN1A
	RUNX2
	RAB17
	EREG
	MYRF
	ABCC4
	SOX21
	TNFSF9
	CD70
	C3
	BMP2
	BFSP1
	STAT5A
	HSPA2
	PTPRB
	STEAP4
	SGCE
	LRFN1
	A4GALT
	TST
	KRT17
	SPECC1
	DOCK4
	FLNC
	GAD1
	SNRPN
	ARHGAP22
	CGNL1
	ALDH1A2
	IVD
	CALML4
	LOXL1
	SOX15
	CD68
	AP1M2
	KLK10
	CNN1
	BST2
	PXDN
	PGPEP1
	SULT4A1
	ASS1
	SMPDL3B
	ULBP2
	EPS8L1
	CHMP1A
	F12
	PDLIM4
	PPP1R1B
	KHDRBS3
	ZNF304
	ZNF20
	C19orf57
	NUP210
	RAMP1
	TRIM47
	DLG4
	REEP2
	VSTM2L
	BHMT2
	SPG20
	PDE6B
	SEC14L4
	NTS
	SPINK5
	LOXL2
	CAMK1
	HMGCS2
	GRHL1
	FST
	IL15RA
	CABLES1
	FADS2
	COL4A2
	PSAT1
	TMEM243
	CCDC146
	CD36
	NT5E
	EPHA7
	PRPH
	GLS2
	ITGA7
	KRT7
	PKIB
	FBXL8
	NPL
	SERPINE2
	ALDH1L2
	SPRY2
	LCP1
	SCRN1
	TNS3
	IL6
	ALPK3
	GALNT5
	MYC
	IL33
	DNAJB5
	ARHGEF39
	GMPR
	RAB30
	TMPRSS4
	POU2F3
	PAK6
	STRA6
	CGREF1
	SIX3
	CALHM2
	PARP9
	HERC5
	PDE5A
	NAAA
	LEF1
	MAPK8IP3
	GALNT6
	LPAR6
	SLAIN1
	MBNL2
	RTN1
	CYP1A1
	MFGE8
	TGFB1I1
	NLRC5
	NUDT7
	CDH11
	CDH13
	GAS8
	BCAS3
	SLC39A6
	CCDC40
	CARD14
	RNF157
	CBLN2
	GRB7
	IGFBP4
	FKBP10
	VAV1
	IFITM3
	COL6A2
	TRPM2
	EMP3
	RCN3
	MOB3C
	ZNF697
	CREG1
	CRABP2
	LHX9
	RORC
	CTSK
	SELENBP1
	S100A8
	WNT9A
	ATP6V1C2
	SFXN5
	THNSL2
	GULP1
	FAM171B
	PLAC8
	SNCA
	MYO10
	OSMR
	PAM
	CXCL14
	ZNF300
	DOK3
	RSPO3
	ARHGAP18
	IGFBP3
	IGFBP1
	LRP12
	FAM83A
	VLDLR
	PLIN2
	FBXO10
	PROSER2
	C10orf11
	ADIRF
	INA
	FUOM
	ADM
	ST14
	CCDC15
	FEZ1
	TAGLN
	FERMT3
	HMGA2
	LYPD6B
	ADAMTS12
	CCDC3
	DPYSL4
	ADAM8
	CCDC74B
	MGAT5
	HSPB8
	ZNF773
	GJA1
	RASGRP3
	FARP1
	PRDM8
	STK32B
	DAB2
	ACOXL
	CLGN
	PTPRR
	NR4A2
	RBMS1
	SLC25A27
	PLEKHG4B
	NMRAL1
	CFDP1
	KCTD15
	CACNA2D1
	THY1
	C16orf74
	UBASH3B
	ROBO3
	ANGPT1
	LRRK1
	CNTNAP3B
	C21orf91
	ADAMTS1
	APCDD1
	FZD7
	KCNMA1
	PCDH1
	RAB11FIP1
	NMNAT2
	RBPMS
	TMEM171
	NRG1
	STEAP2
	ST3GAL2
	CACNA2D3
	TSPAN18
	KRTCAP3
	HIST1H2BD
	HIST1H4H
	DYNC1I1
	TAGLN2
	SPATA2L
	SV2A
	CCDC24
	C2orf81
	ACTC1
	PTMS
	SPON2
	ZDHHC1
	RGS12
	PDE9A
	ITGB2
	MPZL3
	AZGP1
	DMKN
	ZNF382
	ITGA5
	CCDC78
	AK4
	CAMK2N1
	ALPL
	NTNG1
	GFI1
	OLFML2B
	KLHDC9
	DENND2D
	INHBB
	CTSS
	S100A9
	ALPP
	IGFBP7
	ADORA1
	TGFBR2
	FBLN2
	NUAK2
	AIM2
	C4orf36
	PTX3
	CXCL3
	CXCL5
	GRIK3
	RPL39L
	MFI2
	MST1R
	PITX2
	EDIL3
	STARD4
	SPINK1
	EGFLAM
	TERT
	FOXQ1
	CSF2
	T
	GALNT10
	COL1A2
	ADCY1
	TNFRSF11B
	NOS3
	CTHRC1
	MAMDC2
	ALDH1A1
	CLDN3
	MELK
	FAT3
	CRYL1
	DACT1
	STOX1
	TC2N
	IFI27
	ABTB2
	SPRED1
	GPT2
	AMN
	FBN1
	CKB
	GABRB3
	DCHS1
	NETO1
	RAG1
	CYB5R2
	SERPINB7
	TRIM66
	PRTG
	PKD1L2
	CENPV
	ATF7IP2
	MESP1
	STAT6
	EVA1C
	TEF
	UGT1A6
	JSRP1
	MVD
	SPATA33
	TUBA1A
	C19orf33
	KLK5
	KLK6
	IGFBP6
	PRDX2
	GHDC
	ENTPD3
	MAP4K2
	SCARA3
	DEGS2
	FILIP1L
	SCNN1B
	HR
	GBX2
	SLC20A2
	PKIG
	NPNT
	TSPAN5
	STXBP6
	LGALS9
	ATF5
	CPT1C
	DTWD2
	ZNF32
	NRG4
	ROBO1
	CHRNB1
	ADRA1B
	FABP6
	FABP4
	FOS
	CST1
	METTL7B
	KRT4
	ELOVL6
	SERPINB9
	CDH2
	IRX2
	GTSF1
	TMEM133
	KCNS3
	TANC2
	PRKCDBP
	PKIA
	FUT3
	PRKCE
	LRG1
	NPTX1
	CHST11
	KRT13
	KRT20
	LPAR3
	ECEL1
	FGG
	PIK3CD
	P2RY6
	TCEA2
	LGALS4
	BCL2
	NINJ2
	MIR31HG
	SCG2
	KRCC1
	CD8B
	SNTB1
	MBOAT1
	ATOH1
	MUCL1
	EVC2
	BNC2
	RHOD
	ABLIM3
	SYT12
	C11orf86
	AGR3
	PTPRM
	JUP
	CTSF
	TNK1
	PHLDA3
	IL20RB
	SLCO2A1
	FGFBP3
	SEZ6L2
	UBE2C
	GOLGA8A
	LPL
	KCNE3
	UCP2
	SFN
	LRRN1
	NUPR1
	CCDC57
	SYNE3
	MYO1D
	BASP1
	C8orf4
	MUC20
	FZD8
	DLGAP1-AS1
	HIC1
	JUN
	RP11-169K16.8
	FAM132B
	ZHX2
	CPNE7
	TMEM52
	MSC
	VWA1
	MKRN3
	CIITA
	APOBEC3B
	CITED4
	ANKRD18A
	TDRP
	FGD6
	C17orf104
	C11orf71
	BHLHA15
	MB21D2
	ZFP82
	C6orf223
	CLDN7
	PNMAL1
	UBA7
	HIST2H4B
	BACE2
	SYNM
	FIGN
	KBTBD3
	MXRA7
	NDN
	TSKU
	CRIP2
	CAMK1D
	LYSMD4
	NKX2-5
	GAS6
	CCBE1
	RIPK4
	RP11-958N24.1
	FAM46C
	FAM101B
	UPP1
	NPIPA5
	HIST2H4A
	NPW
	ADRA2C
	FAM132A
	OAF
	POU3F2
	PROS1
	CEND1
	LPAR5
	CLDN6
	OSBP2
	USP18
	SORCS2
	FLRT2
	ANO9
	IFITM2
	TNFAIP2
	SFTPA2
	MUC1
	L3MBTL1
	DLK1
	KCNQ5
	PTCH1
	KRT5
	GPAT2
	GABRA5
	BACE1
	THBS2
	ANKRD37
	PRR5
	KRT14
	C1QL4
	GCNT1
	RDM1
	COL4A1
	SAMD11
	TMSB4XP8
	HIST1H1C
	DNER
	WNT7B
	AGRN
	SBK1
	COL25A1
	HBA2
	C15orf52
	DPYD
	PARVB
	TEKT4P2
	TMSB4XP2
	SH2D5
	S100A4
	CTSE
	SRGAP3
	SFTA2
	EVL
	TPK1
	AFAP1
	C1orf186
	CACNA1H
	MMP1
	S100A2
	ADA
	ZFP28
	LAMB3
	HCAR1
	ZNF429
	ANXA6
	SLC6A17
	ZNF772
	ZNF655
	STMN3
	HIST1H2BH
	SLC2A10
	HOXA4
	MFAP5
	SERPINB2
	DPP4
	ZNF461
	S100A6
	AGAP9
	DSCR8
	LPAR1
	MB
	MAN1A2
	SULT1C2
	SLC29A3
	TPM2
	NBR2
	APCDD1L
	RASGEF1A
	DZIP3
	TBKBP1
	RNU1-85P
	SNORA71C
	SNORA23
	RNU4-2
	HIST2H2AA4
	HIST2H3PS2
	NPY4R
	TCEA3
	HSD17B8
	COL5A2
	HLA-DRA
	DFNB59
	HSPA1A
	TRIM39
	ZNF468
	HLA-F
	CASC10
	C9orf135
	FAM83A-AS1
	SYCE1L
	CCDC144NL
	TECPR1
	KRT81
	RGL3
	C1RL-AS1
	HCP5
	HLA-H
	HLA-A
	VGLL3
	SNORA5A
	RNVU1-4
	RNVU1-7
	SNORD15B
	DIO2
	IGKC
	RNA5SP323
	CRIP1
	GSTM2
	TREX1
	S1PR3
	ACTBP2
	ZNF845
	AC098614.2
	UBD
	ITGA1
	PLEKHM1P
	AS3MT
	RCN1P2
	EML6
	CD27-AS1
	MUC5AC
	BX322557.10
	TNFRSF25
	ATAD3C
	SNURF
	RBAKDN

## Sheet: Vandetanib
	Responsive genes		gene	locus	promoter						gene	locus	enahncer						gene	locus	TFBS
1	ENPP4		ETV1	7:14030466;7:14030478	chr7:14029642-14031642;chr7:14030327-14032327						CD9	12:6166523;12:6166543;12:6166796;12:6166813;12:6167110;12:6167111;12:6167311;12:6307793;12:6307794;12:6307953;12:6307980;12:6309219;12:6309227;12:6309779;12:6309781;12:6309788	chr12:6166153-6170026;chr12:6307002-6314029						KDM5A	12:58258839;12:58259059;12:58259234;12:7079085	chr12:58253397-58277641;chr12:7078816-7080865
2	SEMA3F		CD9	12:6307793;12:6307794;12:6307953;12:6307980;12:6309219;12:6309227	chr12:6307481-6309481						TRIT1	1:39980450	chr1:39979129-39982706						BCL11A	2:224700833	chr2:224700795-224701075
3	DBNDD1		GSTO2	10:106034772	chr10:106032886-106034886						FOXC1	6:1614192;6:1614201	chr6:1608859-1614727						FOXA2	20:30158796;20:30158827;20:30158833;20:52209733;20:52209735;20:52209749;20:52209756;20:52209760;20:52209852;20:55839246;20:55839663;20:55839671;20:62587576;20:62587580	chr20:30158746-30159036;chr20:52209691-52210379;chr20:55839201-55839691;chr20:62587499-62588274
4	TFPI		MGLL	3:127541817;3:127541832	chr3:127541725-127543725						FGFR3	4:1768569;4:1769929;4:1769950;4:1770486;4:1770490;4:1770491	chr4:1764427-1773601						FOXA1	14:50700354;14:62217864;14:62217867;14:62217869;14:62217871;14:62217881;14:62217891;14:70317126;14:70317147;14:74224776;14:74224787	chr14:50700123-50700403;chr14:50700150-50700434;chr14:62217676-62217916;chr14:70316968-70317248;chr14:70316976-70317260;chr14:74224705-74224945
5	SLC7A2		ATP8B1	18:55470812;18:55470829	chr18:55470327-55472327						EPB41L3	18:5542876;18:5543066;18:5543068;18:5543071;18:5543076;18:5543084;18:5543187;18:5629993;18:5630001;18:5630013	chr18:5542173-5544627;chr18:5626090-5630851						NFIC	19:47217544;19:47217554;19:47217768;19:49256250;19:49256269;19:49256276;19:49256330;19:49256342;19:49256344;19:49256353;19:49256357;19:49256361;19:58790913;19:58790932;19:58790934;19:58790956;19:58906966	chr19:47217049-47218145;chr19:47217105-47218043;chr19:47217589-47218185;chr19:49255630-49256722;chr19:58789795-58791202;chr19:58906066-58907339
6	SARM1		EPB41L3	18:5545242;18:5545392;18:5629993;18:5630001;18:5630013	chr18:5544309-5546309;chr18:5628990-5630990						DSP	6:7541549;6:7541556;6:7541569	chr6:7540481-7555695						FOSL1	11:65683330;11:65683342;11:65683397;11:65683398;11:94501205	chr11:65682695-65683890;chr11:65683251-65683481;chr11:94501033-94501762
7	COPZ2		DSP	6:7541549;6:7541556;6:7541569	chr6:7539869-7541869						BTN3A3	6:26034145	chr6:26019466-26035706						TEAD4	12:102513782;12:3067977;12:3067990;12:52627048;12:54763058;12:58258839;12:58259059;12:58259234;12:58259243;12:58259249;12:58259452;12:58259467;12:6309219;12:6309227;12:6649105;12:6649524;12:88974639	chr12:102513663-102514597;chr12:3067480-3069486;chr12:52626818-52627558;chr12:54762960-54763324;chr12:58258736-58259663;chr12:58258961-58259409;chr12:58258962-58259402;chr12:58258999-58259363;chr12:58259051-58259301;chr12:6308597-6309936;chr12:6647582-6650226;chr12:88974464-88974714
8	PRKAR2B		GLRB	4:157997447;4:157997527	chr4:157995554-157997554						SLC12A7	5:1112036	chr5:1101136-1112615
9	YBX2		SLC15A3	11:60720093;11:60720094;11:60720297	chr11:60719257-60721257						MYCL	1:39980431;1:39980456	chr1:39979129-39982706
10	ETV1		ACCS	11:44087685;11:44087713	chr11:44085728-44087728;chr11:44085811-44087811						SOX4	6:21588540;6:21588547	chr6:21586615-21589999
11	SCIN		TCIRG1	11:67805380;11:67806118	chr11:67804461-67806461						NRN1	6:5997574;6:5997886;6:5997893;6:6007896;6:6007902;6:6007904;6:6007922;6:6007941	chr6:5995673-6000203;chr6:6005481-6009461
12	TEAD3		SASH1	6:148663576;6:148663583;6:148663588	chr6:148661728-148663728						SHC2	19:461162;19:461173;19:461175;19:461201;19:461855;19:461873;19:461874	chr19:459441-462745
13	JARID2		LOX	5:121413916;5:121413923	chr5:121412918-121414918						MAP1B	5:72526067;5:72526086;5:72526088;5:72526173;5:72526366	chr5:72524836-72526883
14	ADAM22		QPCT	2:37571678;2:37571688;2:37571704;2:37571727	chr2:37569752-37571752						ENOSF1	18:711972;18:711981	chr18:708677-713378
15	ST3GAL1		PARD6B	20:49346984;20:49346985	chr20:49346080-49348080						PDE6B	4:1046863	chr4:1045882-1048199
16	CD9		NRN1	6:6007896;6:6007902;6:6007904;6:6007922;6:6007941	chr6:6007633-6009633;chr6:6007838-6009838						TRIM29	11:120195963;11:120195966	chr11:120195339-120202709
17	GIPR		SHC2	19:461162;19:461173;19:461175;19:461201;19:461855;19:461873;19:461874	chr19:460996-462996						GNAL	18:11689744	chr18:11688582-11690371
18	SLC6A13		PXDN	2:1749394;2:1749712;2:1749730;2:1749768	chr2:1748291-1750291						NFIC	19:3358250;19:3358255;19:3358263;19:3358268	chr19:3357503-3362953
19	ALOX5		H19	11:2019080;11:2019090;11:2019091;11:2019116	chr11:2019065-2021065						PLCH2	1:2416069	chr1:2411555-2417307
20	CNTN1		RFTN1	3:16555362;3:16555364;3:16555372	chr3:16555222-16557222						CELF5	19:3358250;19:3358255;19:3358263	chr19:3357503-3362953
21	CYP24A1		PDE6B	4:617701;4:617845;4:617846	chr4:617362-619362						RBM47	4:40632524;4:40632530;4:40632548	chr4:40625388-40632600
22	SAMD4A		ECHDC3	10:11784141;10:11784151;10:11784152	chr10:11782355-11784355						SYK	9:90795429;9:90795522;9:90795542	chr9:90793602-90797000
23	CPS1		HOOK1	1:60280028;1:60280124;1:60280138	chr1:60278532-60280532						AKR1E2	10:4868328;10:4868329;10:4868331	chr10:4866923-4868556
24	ABCC2		FHOD3	18:33876856;18:33876871	chr18:33875658-33877658						IRX2	5:2751705;5:2751711	chr5:2746360-2753888
25	PLEKHO1		KRT7	12:52626748	chr12:52624953-52626953						HOXB2	17:48503182;17:48503183	chr17:48503034-48504675
26	VIM		GYPC	2:127413505	chr2:127411510-127413510						GLDC	9:6645860;9:6645870;9:6645883;9:6645884	chr9:6644161-6647050
27	APBA2		TFAP2A	6:10421460	chr6:10419797-10421797						IFITM1	11:315318;11:315319;11:315697;11:315758;11:318269	chr11:311376-318360
28	VCAN		AMIGO2	12:47474712;12:47474718;12:47474720	chr12:47473734-47475734						SDHAP3	5:1594623	chr5:1593841-1595218
29	FAM65C		GNAL	18:11750521;18:11750879;18:11750979;18:11750982;18:11750993	chr18:11749470-11751470						C5orf38	5:2751705;5:2751762;5:2751897;5:2751901;5:2755439;5:2755442	chr5:2746360-2753888;chr5:2754518-2757320
30	AIFM2		NFIC	19:3358250;19:3358255;19:3358263;19:3358268	chr19:3357560-3359560						NHLRC1	6:18122611;6:18122620	chr6:18121774-18123319
31	BARX2		ATP8B2	1:154297991;1:154298543;1:154298839;1:154298840;1:154298889	chr1:154296035-154298035;chr1:154298275-154300275						S100A3	1:153507260	chr1:153505802-153508795
32	TRIT1		PTPRG	3:61546330;3:61546393	chr3:61545242-61547242						ZNF347	19:53193812;19:53661431;19:53661446;19:53661502;19:53661507;19:53661587;19:53661589;19:53661595	chr19:53192123-53194053;chr19:53659942-53662608
33	DSG2		FUOM	10:135171559;10:135171564;10:135171574	chr10:135171529-135173529						IFI30	19:18402115;19:18402128	chr19:18401291-18404101
34	CP		PRKCA	17:64298868;17:64298879	chr17:64296925-64298925
35	C12orf4		LY6E	8:144098437;8:144098459	chr8:144097901-144099901
36	CELF2		DHRS3	1:12679099;1:12679103	chr1:12677737-12679737
37	COL9A2		CCDC74A	2:132285335;2:132285348	chr2:132283406-132285406
38	LTBP1		TRIM46	1:155146241;1:155146248;1:155146257	chr1:155144262-155146262;chr1:155145229-155147229
39	PLEKHA5		RBM47	4:40632524;4:40632530;4:40632548	chr4:40631883-40633883
40	NNAT		CXCL1	4:74734076;4:74735093;4:74735095;4:74735102	chr4:74733108-74735108
41	NRIP2		FABP5	8:82192589;8:82192641	chr8:82190717-82192717
42	LAMA3		ALDH7A1	5:125931651	chr5:125931082-125933082
43	FOXC1		C9orf64	9:86571921;9:86571927;9:86571933	chr9:86571663-86573663
44	ATP9A		AKR1E2	10:4868328;10:4868329;10:4868331	chr10:4866368-4868368
45	TRAF3IP2		ZNF667-AS1	19:56988703;19:56988709;19:56988721;19:56988734;19:56989148;19:56989236	chr19:56987242-56989242;chr19:56987492-56989492
46	SERPINB3		ACAA2	18:47340860;18:47340881	chr18:47340251-47342251
47	PKP2		HOPX	4:57522689;4:57522989	chr4:57522688-57524688
48	TBXAS1		C1QTNF1	17:77020025;17:77020038;17:77021036;17:77021162;17:77021175;17:77021176;17:77021193;17:77021209;17:77021226;17:77021227;17:77021251	chr17:77018157-77020157;chr17:77019744-77021744
49	TARBP1		ARL10	5:175792123;5:175792124	chr5:175790501-175792501
50	SLC2A3		GLDC	9:6645860;9:6645870;9:6645883;9:6645884	chr9:6645692-6647692
51	YBX3		MAPK15	8:144797964	chr8:144796506-144798506
52	STYK1		PRKD1	14:30397396;14:30397409;14:30397411;14:30397419	chr14:30396899-30398899
53	CDH3		MANEAL	1:38259788;1:38259792;1:38259796	chr1:38259159-38261159
54	DGAT2		MUC1	1:155162716	chr1:155162706-155164706
55	AHRR		DLK1	14:101192860;14:101192871;14:101192883;14:101192895	chr14:101191201-101193201
56	HIPK2		PRAME	22:22901597	chr22:22900174-22902174
57	LPAR2		C5orf38	5:2751705;5:2751762;5:2751897;5:2751901	chr5:2750261-2752261
58	FAR2		FAM92A1	8:94712187;8:94712396;8:94712404;8:94712419;8:94712460	chr8:94710734-94712734
59	ANKRD44		PARVB	22:44419624;22:44419791;22:44419854;22:44421022;22:44421227	chr22:44418156-44420156;chr22:44420183-44422183
60	PDIA5		FZD9	7:72847235;7:72847411	chr7:72846108-72848108
61	GSTO2		TCF4	18:53257019;18:53257028;18:53257154	chr18:53255860-53257860;chr18:53257045-53259045
62	MPPED2		TEAD4	12:3067977;12:3067990	chr12:3066477-3068477;chr12:3066747-3068747
63	EML1		ZNF677	19:53758121;19:53758126;19:53758139;19:53758141	chr19:53758111-53760111
64	FECH		ZNF667	19:56989148;19:56989236;19:56989252;19:56989253;19:56989262;19:56989315;19:56989333;19:56989503	chr19:56988770-56990770
65	TNFRSF1A		FAM155A	13:108520311;13:108520946	chr13:108519460-108521460
66	FGFR3		HLA-E	6:30455946;6:30455964;6:30456331;6:30456340	chr6:30455182-30457182
67	PITX1		HLA-H	6:29855119	chr6:29853536-29855536
68	KCNAB2		SH3D21	1:36771573;1:36771574;1:36771832;1:36772010	chr1:36769993-36771993;chr1:36770707-36772707
69	NUCB2		MEG3	14:101291856;14:101291994	chr14:101290444-101292444;chr14:101290468-101292468
70	NDST1		ISPD	7:16461190;7:16461204	chr7:16460947-16462947
71	LMCD1		IFI30	19:18284566;19:18284577;19:18284583;19:18284586	chr19:18282589-18284589
	SLC6A15
	MPP5
	TRHDE
	KDM5A
	MGLL
	SEMA3A
	ADD2
	PLXNA2
	FGFR1
	HOXA9
	EDN1
	TP53INP2
	CLUL1
	SLC1A3
	LXN
	LIPE
	PGM1
	DDX43
	CXCL2
	PCDHA6
	PCDHGA2
	ATP8B1
	EPB41L3
	SEMA5B
	ERC1
	CD82
	MAST2
	MMP2
	NID2
	PHACTR3
	BLVRB
	CERS4
	POU4F3
	LAMB1
	ITGA6
	SLC7A8
	SEMA6A
	COMT
	DSP
	STX1B
	HSD3B7
	MISP
	GSTT2
	MFNG
	LHX3
	ATRNL1
	TRDMT1
	SPOCK2
	ACTA2
	SFXN3
	LHPP
	SH3PXD2A
	DKK1
	EBF3
	RASD1
	ALDH3A1
	CCL2
	CNTNAP1
	COL1A1
	ABCC3
	PHOX2B
	NMU
	CPE
	GLRB
	DBX1
	KIAA1549L
	SLC15A3
	ACCS
	MDK
	CALCA
	TCIRG1
	SH2B3
	MGP
	ARHGDIB
	ING4
	TPI1
	ENO2
	PTPN6
	SLCO1B3
	COL12A1
	BTN3A3
	FAM65B
	SASH1
	CAP2
	MDFI
	PTK7
	VEGFA
	PCDHB2
	GHR
	LOX
	SPARC
	PCDHB6
	CDH6
	SLC12A7
	PDGFRB
	STC2
	RBP1
	WNT5A
	PFKFB4
	COL7A1
	IFT57
	FRMD4B
	TNNC1
	KCNIP3
	ITGA4
	GCG
	TLX2
	FHL2
	QPCT
	DLX2
	KYNU
	WIPF1
	EPAS1
	EPHA4
	GPX7
	MIIP
	NCF2
	PLA2G4A
	MYCL
	RLF
	PADI2
	RGS4
	IGSF21
	GBP3
	ID3
	RCAN3
	MREG
	SGIP1
	PLAGL1
	VAMP8
	PPL
	GDA
	ONECUT2
	IFI27L2
	PPP4R4
	BCL11A
	EPCAM
	PPP1R3C
	AVPI1
	HOXB3
	MOB3B
	CYSTM1
	ENY2
	DUSP4
	NPPB
	SCPEP1
	PSPC1
	A1BG
	ZSCAN18
	PDZRN3
	CSTA
	B4GALT4
	ZMYM2
	LDB3
	FAM213A
	PQLC1
	HOXA7
	INHBA
	BICC1
	P4HA1
	DBH
	NMI
	G0S2
	RAB38
	OBSL1
	SLPI
	PARD6B
	PPP4R1L
	MRS2
	PEX6
	MOCS1
	SOX4
	NRN1
	MT1G
	MT2A
	C1orf61
	C3
	FOSB
	FOXA2
	MCF2L
	L3HYPDH
	BEST3
	KLF2
	F2RL3
	SYNGR3
	STEAP4
	GNAI1
	SGCE
	BAIAP2L2
	APOL2
	LIF
	GAD1
	SNRPN
	IVD
	LOXL1
	SOX15
	CD68
	CDKN2D
	FOXA1
	RHBDF2
	SGOL1
	SHC2
	TNNI3
	CNN1
	APOE
	APOC1
	GADD45G
	BST2
	ZSWIM6
	PXDN
	GDF15
	CRB3
	H19
	LAMA5
	THEMIS2
	C19orf66
	SYNE1
	GGT7
	C1QL1
	CAP1
	SH3BP5
	RFTN1
	KCNC3
	NAPSA
	ANO1
	MAP1B
	KRT34
	LGALS3
	MATN3
	PPARG
	ENOSF1
	IQCA1
	SEC61G
	LANCL2
	ITGB4
	NES
	VSTM2L
	CHI3L1
	PDE6B
	CAMK1
	GSTM1
	NOTCH2
	FKBP11
	ECHDC3
	HOOK1
	DSC2
	DTNA
	FHOD3
	TCN1
	SLC37A2
	CTSL
	TAOK3
	OASL
	CGA
	LMO2
	ITGA7
	RDH5
	KRT7
	KCNH3
	LACE1
	PKIB
	SEMA4F
	CPM
	FAM129A
	TBC1D4
	THSD1
	SCEL
	LCP1
	GPNMB
	ALPK3
	HLX
	GYPC
	ANGPTL2
	DNAJB5
	TMEM8B
	KIF13A
	TFAP2A
	TUBB2B
	RNF144B
	MYO7A
	SYTL2
	MMP7
	TRIM29
	RDX
	TMPRSS13
	THBS1
	PLCB2
	STRA6
	CYP1B1
	TMEM180
	CDK15
	CHRNA1
	ARHGAP24
	RGS3
	B4GALNT3
	CLSTN3
	AMIGO2
	LUM
	ASCL1
	GALNT6
	TTC6
	RAB15
	DET1
	CLEC18B
	NLRC5
	KIFC3
	GNAL
	GALNT1
	GATA6
	SAT2
	TMC6
	RAB40B
	CBLN2
	PIP4K2B
	NFIC
	ATHL1
	COL6A1
	SIK1
	EMP3
	PADI1
	CNKSR1
	NBPF3
	ATP1B1
	NUF2
	RGS5
	RGL1
	LHX9
	ADAMTSL4
	SELENBP1
	ATP8B2
	EFNA3
	PPFIA4
	DQX1
	DLX1
	GULP1
	SUMF1
	PTPRG
	LRIG1
	ALDH1L1
	UCN2
	MUC4
	SCD5
	PDGFC
	PIK3R1
	DOK3
	CYP39A1
	RSPO3
	SLC18B1
	MTFR2
	EGFR
	IGFBP3
	ZC3HAV1L
	DENND2A
	CSGALNACT1
	ST18
	TACC1
	CER1
	CDKN2A
	NR6A1
	PROSER2
	ADIRF
	ANKRD1
	EIF4EBP2
	INA
	FUOM
	PLCH2
	ESAM
	KIRREL3
	TM7SF2
	DOC2A
	TMEM218
	LYPD1
	PPP1R1C
	IL18
	SLC7A11
	CACNA2D4
	THRB
	EPS8
	AKR1C2
	FLI1
	DST
	SCHIP1
	CCDC74B
	SPOCK1
	CCDC50
	CCNO
	ZIC1
	NMRAL1
	ADPRHL1
	KCTD15
	HS3ST3A1
	ANKRD29
	CHST9
	C16orf74
	UBASH3B
	PRKCA
	C4orf19
	FAM167A
	FAM69A
	C21orf91
	SLFN13
	VOPP1
	GRAMD3
	SETD9
	KCNMA1
	PPP2R2B
	UBE2L6
	MPV17L
	MMP14
	CLEC18A
	CLEC18C
	KIT
	SLC34A2
	KRTCAP3
	TAGLN2
	SLC45A3
	CACHD1
	STC1
	TNNI1
	CBR3
	NPR2
	TFF3
	TMPRSS3
	ZNF66
	NEK8
	LY6K
	LY6E
	FBXL13
	CELF5
	SHANK1
	FGF11
	PDZK1IP1
	PRKAA2
	ZSWIM5
	AK4
	RAVER2
	DHRS3
	LAPTM5
	SYNC
	MEGF6
	SNX7
	HENMT1
	GBP2
	OLFML2B
	MT2P1
	PKDCC
	PIGR
	KCNF1
	CCDC74A
	SGPP2
	S100A11
	SPRR2D
	S100A9
	FSTL1
	ELF3
	IGFBP7
	TRIM46
	ADORA1
	RBM47
	CXCL1
	TM4SF18
	ZNF513
	RPL39L
	ARHGEF3
	CMBL
	C5orf63
	SPINK1
	ERAP2
	CITED2
	RAET1E
	BMPER
	FABP5
	ALDH7A1
	PDP1
	SYK
	LETM2
	RASEF
	C9orf64
	WNK2
	OTUD1
	AKR1E2
	DRGX
	SLC18A2
	PDZD8
	DACH1
	KIAA1462
	GYLTL1B
	PTER
	AMOTL1
	CKB
	CYB5A
	SERPINB7
	PKD1L2
	IQCD
	PLEKHA7
	NNMT
	ZNF667-AS1
	NAV2
	ELFN2
	GNGT2
	UGT1A6
	MYO5B
	ACAA2
	AC104389.28
	ZNF229
	ZNF641
	RHEBL1
	TUBA1A
	RAB4B
	CYP2S1
	PSCA
	LY6D
	KLK5
	KLK6
	ZNF558
	TMC8
	NAALADL1
	SCARA3
	BDKRB2
	SERINC2
	FAM84B
	TCTN2
	KLK7
	PARM1
	ATF5
	RAB3B
	COL22A1
	SDC2
	SPRR1B
	TM2D2
	PLEKHA2
	CKAP2L
	HEXDC
	MT1E
	TM4SF4
	TM4SF1
	NLGN2
	ZPLD1
	FAXDC2
	FOS
	EMX2
	CST1
	DENND5B
	CD14
	KRT4
	SMAGP
	IRX2
	ZNF415
	DCDC1
	PYGO1
	CDC42BPG
	LRG1
	KRT13
	KRT20
	HOPX
	LPAR3
	MAP6
	P2RY6
	ZIK1
	GATM
	FBXL14
	MLLT3
	PRNP
	SCG2
	MAL
	SERF1A
	KRCC1
	CALB2
	FRMD3
	SNTB1
	ISG20
	ID4
	ATOH1
	ALG14
	FGGY
	RAB37
	RAPH1
	DMRT2
	SNCG
	THAP2
	MST1
	TNFRSF10C
	LRFN4
	JUP
	KCNH6
	HOXB2
	C1QTNF1
	CTSF
	CNIH2
	PDIK1L
	GOLGA8A
	TP53I11
	ARL10
	MCTP1
	LIPT2
	UCP2
	FOSL1
	LINC00476
	NR2F1
	B3GALT6
	NUPR1
	ACBD7
	BDNF
	METRNL
	C8orf4
	MUC20
	ACER2
	ZBED2
	PGBD5
	AC108142.1
	GRAMD1C
	STAP2
	ZNF518B
	PARD6G
	SLITRK1
	GLDC
	PARP10
	FAM132B
	FAM101A
	TRIML2
	CDH4
	CTGLF12P
	CITED4
	NRIP1
	TSPYL5
	HIST1H2BC
	MAB21L1
	SHISA2
	ARSJ
	D2HGDH
	MAPK15
	TMEM45A
	TNFSF15
	IBA57
	CLDN7
	ZNF329
	BACE2
	C1S
	SATB1
	NDN
	NKX2-5
	GAS6
	CALN1
	GPR132
	PSG9
	FAM101B
	KREMEN1
	BTBD9
	NPW
	KCNQ3
	ALDH1A3
	TACSTD2
	PRKD1
	EFNA5
	TXNRD2
	TMEM255B
	SLITRK6
	ROBO2
	FLRT2
	MANEAL
	FAM43A
	SIGIRR
	SFTPA2
	HS6ST3
	SP140L
	PARPBP
	ROR1
	MUC1
	DLK1
	PRAME
	IFITM1
	SDHAP3
	EDARADD
	ANKRD20A5P
	C5orf38
	HPDL
	KRT16
	EMID1
	ESPN
	AKR1C1
	BCAM
	NHLRC1
	ZKSCAN4
	SAMD11
	PALM3
	DMBT1
	ARHGAP11B
	DNER
	S100A3
	AGRN
	LINC00265
	HES4
	FAM92A1
	ZP3
	NCCRP1
	COL25A1
	HBA2
	NANOS1
	PARVB
	FZD9
	ZNF548
	FAM26F
	FAM111B
	S100A13
	SH2D5
	CTSE
	HRCT1
	SRGAP3
	FUT4
	S100A5
	NPIPB15
	ZNF605
	MME
	SULF2
	MMP1
	TCF4
	ZNF502
	ZNF418
	TLE1
	CBWD3
	HCAR1
	ANXA6
	ZNF785
	SULT1A2
	SERPINA1
	SVIL
	HHLA3
	ZNF841
	MFAP5
	FAM114A1
	OCLN
	TEAD4
	ZNF677
	ZNF347
	ZNF667
	DSCR8
	AKR1B10
	PEG3
	FLVCR1-AS1
	SH3BGRL2
	MMP17
	ZNF534
	ABCA4
	SFMBT2
	SNORA71D
	SNORA65
	RN7SK
	C1orf53
	FAM72C
	HIST2H3PS2
	ZDBF2
	AGER
	LAYN
	FAM155A
	MICB
	MUC21
	HLA-E
	ASPDH
	RP11-111F5.4
	PSG5
	PCDHA7
	PCDHA2
	PCDHA1
	PRSS1
	KRT81
	SMN2
	DENND1C
	KLRC2
	SERPINB5
	HBA1
	HCP5
	HLA-H
	LNP1
	SNORA37
	RNVU1-7
	RNVU1-14
	SNORA49
	GPX3
	TRBC2
	IGHV3-30
	C17orf51
	KRTAP2-3
	TCTEX1D2
	ARHGEF35
	ERV3-1
	S1PR3
	ZNF816-ZNF321P
	EMP2
	LIPE-AS1
	HBE1
	SH3D21
	LRRC37A4P
	MEG3
	ARHGEF33
	HLA-F-AS1
	ISPD
	RP11-266K4.9
	GOLGA8B
	IFI30
	TENM3
	GS1-393G12.14
	RP1-86C11.7
	RP11-54O7.17
	AFAP1-AS1
	RP11-127B20.3
	RP5-855D21.3
	LL21NC02-1C16.2
	CTB-13F3.1
	RP11-449P15.2
	SNURF
	RP11-378A13.2

## Sheet: PD_153035
	Responsive genes		gene	locus	promoter										gene	locus	enahncer						gene	locus	TFBS
1	SEMA3F		TMEM176A	7:150496855;7:150496872;7:150496881;7:150496965	chr7:150495853-150497853										EVC	4:5710035;4:5710040	chr4:5707481-5713482						MYC	8:110552614;8:110552621;8:131455373;8:143201205;8:143201212;8:143201213;8:145115962;8:145116011;8:145116032;8:145116033;8:145158414;8:145158432;8:145158434;8:146013229;8:146013230;8:55014844;8:55014848;8:77593249;8:77593275	chr1:26396709-26397189;chr1:26396755-26397456;chr1:26396801-26397351;chr1:26396828-26397456;chr1:26396926-26397086;chr1:26396939-26397169;chr1:26397115-26397211;chr1:26397687-26397818;chr1:26399775-26399855;chr1:26401833-26409436;chr1:26408146-26408382;chr1:26409419-26411173;chr1:26409839-26410052;chr1:26413008-26413240;chr1:26415671-26415961;chr1:26415806-26415933;chr1:26418857-26419044;chr1:338…
2	HECW1		PRSS21	16:2865376	chr16:2865163-2867163										EPB41L3	18:5542876;18:5543066;18:5543068;18:5543071;18:5543076;18:5543084;18:5543187;18:5543287;18:5543410;18:5629993	chr18:5542173-5544627;chr18:5626090-5630851						JUN	1:100818309;1:100818320;1:201475946;1:22379685;1:225965337;1:228676132	chr3:149307044-149307654;chr3:40353259-40353380;NA:NA-NA
3	TMEM176A		SLC6A15	12:85306791	chr12:85306608-85308608										DSP	6:7541549;6:7541556;6:7541569	chr6:7540481-7555695
4	CYP26B1		NEBL	10:21463524;10:21463542;10:21463563;10:21463741	chr10:21463116-21465116										LAMA1	18:7117556;18:7117558;18:7117561;18:7117562	chr18:7116996-7118357
5	DBNDD1		PKP1	1:201252201;1:201252216;1:201252360;1:201252361;1:201252381;1:201252544;1:201252546	chr1:201250579-201252579										ELMO3	16:67184153;16:67184159;16:67184165	chr16:67182774-67188059
6	YBX2		EPB41L3	18:5545242;18:5545392;18:5629993	chr18:5544309-5546309;chr18:5628990-5630990										CRISPLD2	16:85304712	chr16:85302335-85315005
7	CCL26		RGS17	6:153453031;6:153453035	chr6:153452389-153454389										AMH	19:2252082;19:2252086;19:2475641;19:2475659;19:2478310;19:2478318;19:2478503	chr19:2247129-2254667;chr19:2474623-2480246
8	PRSS21		ECHDC1	6:127664268;6:127664273;6:127664278;6:127664282	chr6:127663552-127665552										FSD1	19:4360307;19:4360322	chr19:4359474-4362963
9	MGST1		DSP	6:7541549;6:7541556;6:7541569	chr6:7539869-7541869										PTPRS	19:5340805;19:5340808;19:5340810;19:5340825;19:5340848	chr19:5340281-5341359
10	IL32		TSPAN15	10:71210651	chr10:71209225-71211225										MAST1	19:12724020;19:12984833;19:12984846;19:12984847	chr19:12720285-12724467;chr19:12983002-12986482
11	DYRK4		TPTEP1	22:17082038;22:17082042;22:17082046;22:17082048	chr22:17080800-17082800										GLIPR2	9:36035988;9:36165226;9:36165384;9:36165385	chr9:36035949-36040549;chr9:36160874-36167199
12	PHF7		MYL9	20:35169720;20:35169721;20:35169777;20:35169784;20:35169799;20:35169800	chr20:35167886-35169886										TNFSF9	19:6528944;19:6529001;19:6530759;19:6661025;19:6661073;19:6661155	chr19:6527568-6533719;chr19:6660377-6664526
13	FYN		PTPRS	19:5340825;19:5340848	chr19:5340814-5342814										VAV1	19:5799379	chr19:5798947-5799863
14	SYT7		CAV1	7:116164762;7:116164767;7:116164774;7:116164924	chr7:116162838-116164838;chr7:116163062-116165062;chr7:116164346-116166346;chr7:116164411-116166411										IFITM3	11:318269;11:330537;11:331011;11:331075;11:355581;11:355711;11:355724	chr11:311376-318360;chr11:324004-331788;chr11:352202-358026
15	PLAUR		HIST1H2BJ	6:27101601	chr6:27100575-27102575										MYO10	5:16936282;5:16936287;5:16936408	chr5:16930760-16937677
16	DCN		TNFSF9	19:6530759	chr19:6529009-6531009										OBSCN	1:228463543;1:228463545;1:228473140;1:228473153	chr1:228463476-228465899;chr1:228472002-228473200
17	SEMA3B		PXDN	2:1749394;2:1749712;2:1749730;2:1749768	chr2:1748291-1750291										DUSP23	1:159751096;1:159751103;1:159751206;1:159751215;1:159751219	chr1:159751038-159754188
18	ISL1		ASS1	9:133319866;9:133319871;9:133319887	chr9:133318093-133320093										FOXQ1	6:1316786	chr6:1309797-1316944
19	CNTN1		PPP1R1B	17:37782381	chr17:37781176-37783176										ATF7IP2	16:10275487;16:10275494;16:10275499	chr16:10275004-10276285
20	WWTR1		KHDRBS3	8:136467876;8:136468770	chr8:136467715-136469715										LGALS9	17:27331383	chr17:27331315-27334627
21	PHLDB1		RAMP1	2:238768081;2:238768098	chr2:238766186-238768186										IRX2	5:2751705;5:2751711;5:2751714	chr5:2746360-2753888
22	PLEKHB1		FADS2	11:61583866	chr11:61581875-61583875										NINJ2	12:751142;12:751157;12:751167;12:751689;12:751692;12:751771	chr12:749166-756118
23	GRAMD1B		PSAT1	9:80911725;9:80911736	chr9:80909990-80911990										PTPRM	18:7567799;18:7567804;18:7567911;18:7568794;18:7568800	chr18:7565980-7569472
24	DEF6		CCDC146	7:76751250;7:76751253	chr7:76749933-76751933										HCG4	6:29759884;6:29759948	chr6:29757464-29760806
25	PLEKHO1		GLS2	12:56882392;12:56882398;12:56882439;12:56882543	chr12:56882198-56884198										DLGAP1-AS1	18:3450245;18:3450259;18:3450279;18:3450282;18:3453126;18:3453342	chr18:3445791-3460212
26	SLAMF7		KRT7	12:52626748;12:52626772	chr12:52624953-52626953										TMEM52	1:1896554;1:1896556;1:1896567;1:1897768	chr1:1888049-1897969
27	FLT4		HERC5	4:89377912;4:89377916;4:89378046	chr4:89376267-89378267										ZFP82	19:36128068	chr19:36127202-36129900
28	CDH10		NUDT7	16:77756181;16:77756213	chr16:77754388-77756388										CLDN7	17:7165023	chr17:7165001-7165201
29	TNC		COL6A2	21:47517355;21:47517485;21:47517512	chr21:47516032-47518032										NPW	16:2155697	chr16:2147099-2164481
30	CAPG		THNSL2	2:88469720;2:88469730;2:88469731	chr2:88467813-88469813										ADRA2C	4:3765119;4:3765124	chr4:3765068-3766231
31	ZIC2		MYO10	5:16936408	chr5:16936385-16938385										ANO9	11:448070;11:448076	chr11:443602-451865
32	CP		FUOM	10:135171559;10:135171564;10:135171574	chr10:135171529-135173529										IFITM2	11:318269;11:355557;11:355581;11:355692;11:355711;11:355724;11:355838;11:355858;11:355859;11:355866;11:355873	chr11:311376-318360;chr11:352202-358026
33	HDAC9		ST14	11:130029439;11:130029460;11:130029475;11:130029478	chr11:130027681-130029681										HIST1H2BH	6:26251516	chr6:26248916-26261823
34	ADAMTS6		FERMT3	11:63973269;11:63973270;11:63973277	chr11:63972151-63974151										TPM2	9:35691285;9:35691292	chr9:35679739-35692495
35	SLC4A8		LYPD6B	2:149894472	chr2:149892980-149894980										ZNF808	19:53104385;19:53104425	chr19:53093827-53104558
36	TNIP3		DPYSL4	10:134000206;10:134000210;10:134000214;10:134000216	chr10:133998413-134000413
37	CYBA		RBPMS	8:30241538;8:30241548	chr8:30240016-30242016
38	NNAT		TMEM171	5:72415570;5:72415638;5:72415646;5:72415665;5:72415668;5:72415889;5:72415894;5:72415924;5:72415931;5:72416263;5:72416269	chr5:72414387-72416387
39	LY75		STEAP2	7:89840814	chr7:89838999-89840999;chr7:89839173-89841173
40	PTPRN		MX1	21:42790516;21:42792241;21:42797918	chr21:42790484-42792484;chr21:42795957-42797957
41	ATP9A		DUSP2	2:96812038;2:96812044;2:96812050;2:96812067;2:96812153;2:96812156;2:96812187;2:96812222	chr2:96811179-96813179
42	MCOLN3		MEIOB	16:1922418;16:1922423	chr16:1922102-1924102;chr16:1922179-1924179
43	TRAF1		IGFBP7	4:57976699;4:57976702;4:57976713;4:57976721	chr4:57976551-57978551
44	LAMC2		PITX2	4:111544325	chr4:111544254-111546254
45	SLC2A3		ZNF667-AS1	19:56988703;19:56988709;19:56989148;19:56989236;19:56989252	chr19:56987242-56989242;chr19:56987492-56989492
46	BCAT1		TTC39C	18:21594045;18:21594059	chr18:21592383-21594383
47	LIMCH1		ELOVL6	4:111120249;4:111120331;4:111120348	chr4:111119771-111121771;chr4:111119820-111121820
48	SPA17		PKIA	8:79428305;8:79428313;8:79428321;8:79428325	chr8:79426335-79428335
49	COL17A1		EPHX4	1:92495469;1:92495478;1:92495480;1:92495483	chr1:92493532-92495532
50	TLE2		SNTB1	8:121824672;8:121824678;8:121824682	chr8:121824309-121826309
51	MPPED2		C1QTNF1	17:77020025;17:77020038;17:77020041;17:77020042;17:77021036;17:77021162;17:77021175;17:77021176;17:77021193	chr17:77018157-77020157;chr17:77019744-77021744
52	CLDN18		SFN	1:27189514	chr1:27187632-27189632
53	SYT1		SPHK1	17:74379123;17:74379127	chr17:74378689-74380689
54	NAV3		VWA1	1:1369158;1:1369572;1:1369593	chr1:1368902-1370902
55	CBFB		CRIP2	14:105941186;14:105941190;14:105941195;14:105941242;14:105941251;14:105941257;14:105942230;14:105942243;14:105942283;14:105942298;14:105942411;14:105942430;14:105942575;14:105942598;14:105942599;14:105942621;14:105942637;14:105942650;14:105942661	chr14:105940195-105942195;chr14:105941582-105943582
56	ST6GALNAC1		UPP1	7:48127925;7:48127997	chr7:48126199-48128199;chr7:48126736-48128736;chr7:48126808-48128808;chr7:48126850-48128850
57	WIPI1		OAF	11:120081466;11:120081488;11:120081489;11:120081498	chr11:120079746-120081746
58	LMCD1		DLK1	14:101192860;14:101192871;14:101192883;14:101192895	chr14:101191201-101193201
59	SLC6A15		PRAME	22:22901597;22:22901608	chr22:22900174-22902174
60	SPEG		PRR5	22:45097757;22:45097768;22:45097778	chr22:45096077-45098077
61	EVC		RDM1	17:34257436;17:34257462;17:34257463	chr17:34257303-34259303
62	GSDMB		PARVB	22:44419624;22:44419791;22:44419854;22:44419866;22:44419904;22:44421022	chr22:44418156-44420156;chr22:44420183-44422183
63	CA12		TCF4	18:53257019;18:53257028;18:53257154;18:53257178	chr18:53255860-53257860;chr18:53257045-53259045
64	SEMA3A		ZFP28	19:57049676;19:57049680	chr19:57048316-57050316
65	SEMA3C		ZNF429	19:21688412	chr19:21686436-21688436
66	PAG1		SLC6A17	1:110693064;1:110693069;1:110693071	chr1:110691131-110693131
67	MCAM		ZNF655	7:99156074;7:99156084;7:99156097	chr7:99154447-99156447
68	RARB		HIST1H2BH	6:26251516	chr6:26249878-26251878
69	FAP		MBP	18:74846592	chr18:74844774-74846774
70	NEBL		LPAR1	9:113800677;9:113800682;9:113801159;9:113801189;9:113801194;9:113801207;9:113801213	chr9:113800365-113802365
71	LXN		TPM2	9:35691285;9:35691292	chr9:35690053-35692053
	SP140
	EPB41L2
	MOXD1
	DDX43
	CROCCP3
	PKP1
	PHLPP1
	EPB41L3
	OXCT1
	COL16A1
	CD82
	ABCB1
	WNT11
	EPDR1
	SNX10
	LAT2
	TRIP6
	TMPRSS11E
	MMP2
	EPB41L1
	PEBP1
	CDIP1
	ZBTB25
	BLVRB
	CERS4
	FCGBP
	NRCAM
	RGS17
	UNC13D
	TGFB2
	ECHDC1
	BAMBI
	DSP
	SYDE2
	TSPAN15
	H2AFY2
	MAST3
	MTAP
	MISP
	GSTT2
	SUSD2
	SEZ6L
	GCAT
	TPTEP1
	ARSA
	PNPLA3
	COCH
	HIF1A
	DHRS2
	REC8
	NFATC4
	MMP9
	NTSR1
	CDC25B
	MYL9
	CST3
	MYL12A
	LAMA1
	NALCN
	MSLN
	HSF4
	CORO1A
	ELMO3
	NDRG4
	SETD6
	CRISPLD2
	HAGHL
	TOX3
	QPRT
	IQCH
	HOMER2
	BMF
	RHOV
	CALB1
	NIPAL2
	GDAP1
	NDRG1
	SPAG1
	NCALD
	NEFL
	KCNN4
	FCGRT
	PPP1R13L
	AMH
	ZNF419
	SLC1A6
	FSD1
	TGFB1
	MYH14
	CD79A
	ATP1A3
	PTPRS
	ZNF175
	MAST1
	LSR
	GTPBP10
	RASA4
	NAMPT
	PON3
	DLX5
	DFNA5
	CAV2
	CAV1
	TSPAN12
	CPVL
	NPTX2
	PCOLCE
	SFRP4
	AGR2
	CLIP2
	CNTNAP3
	HOXA7
	GLIPR2
	CNTFR
	SFTPA1
	SRGN
	RASSF8
	BHLHE41
	ATP7B
	METTL21B
	G0S2
	RAB38
	SLPI
	SLC12A5
	KCNK15
	HIST1H2BJ
	SPDEF
	RUNX2
	RAB17
	MYRF
	LRRC29
	MT1G
	ABCC4
	PAX8
	TNFSF9
	CD70
	C3
	LRRN4
	HSPA2
	RGS13
	HIVEP3
	PTPRB
	AKAP9
	STEAP4
	SGCE
	A4GALT
	KRT17
	DOCK4
	FLNC
	GAD1
	SNRPN
	ARHGAP22
	CGNL1
	ALDH1A2
	IVD
	PALLD
	SOX15
	CD68
	AP1M2
	THEM6
	BST2
	PXDN
	CYP2E1
	ASS1
	SMPDL3B
	ULBP2
	EPS8L1
	CHMP1A
	PPP1R1B
	KHDRBS3
	VIMP
	ZNF20
	C19orf57
	PPARG
	LINC00470
	RAMP1
	TRIM47
	DLG4
	REEP2
	VSTM2L
	BHMT2
	NTS
	SPINK5
	C14orf159
	LOXL2
	CAMK1
	HMGCS2
	IL6ST
	FST
	GRP
	IL15RA
	RERG
	DTNA
	FADS2
	PSAT1
	TMEM243
	CCDC146
	CGA
	PRPH
	GLS2
	KRT7
	NHSL1
	PKIB
	SEMA4F
	FBXL8
	DOCK10
	SERPINE2
	ALDH1L2
	SPRY2
	LCP1
	TNS3
	IL6
	ALPK3
	GALNT5
	MYC
	IL33
	DNAJB5
	ARRB1
	RAB30
	TMPRSS4
	POU2F3
	THBS1
	PAK6
	STRA6
	GIPC2
	CGREF1
	CYP1B1
	SIX3
	CALHM2
	RBP4
	MSMB
	SHF
	HERC5
	LEF1
	MAPK8IP3
	SLC38A4
	LUM
	GALNT6
	LPAR6
	SLAIN1
	MBNL2
	RTN1
	GCNT3
	NEIL1
	CYP1A1
	MFGE8
	NLRC5
	NUDT7
	CMTM3
	CDH11
	CDH13
	GAS8
	SLC39A6
	GATA6
	CCDC40
	CARD14
	SECTM1
	RNF157
	CBLN2
	IGFBP4
	FKBP10
	VAV1
	IFITM3
	COL6A2
	TRPM2
	EMP3
	TM4SF5
	RCN3
	FHAD1
	CNKSR1
	MOB3C
	CREG1
	CRABP2
	CTSK
	S100A8
	WNT9A
	DQX1
	THNSL2
	GULP1
	FAM171B
	EPHA5
	PLAC8
	SNCA
	MYO10
	OSMR
	PAM
	ZNF300
	TRIM7
	RSPO3
	ARHGAP18
	IGFBP3
	IGFBP1
	FBXO25
	LRP12
	FAM83A
	VLDLR
	PLIN2
	FBXO10
	PROSER2
	ADIRF
	FUOM
	ADM
	KLHL35
	ST14
	FEZ1
	TAGLN
	FERMT3
	CDH8
	HNMT
	LYPD6B
	IL18
	ADAMTS12
	DPYSL4
	ADAM8
	RNF144A
	CCDC74B
	HSPB8
	GJA1
	RASGRP3
	FARP1
	PRDM8
	DAB2
	ACOXL
	PTPRR
	NR4A2
	RBMS1
	SLC25A27
	PLEKHG4B
	CFDP1
	KCTD15
	CACNA2D1
	C16orf74
	UBASH3B
	ROBO3
	FAM134B
	ANGPT1
	LRRK1
	OBSCN
	CNTNAP3B
	C21orf91
	ADAMTS1
	APCDD1
	FZD7
	KCNMA1
	FBXO43
	RAB11FIP1
	NMNAT2
	RBPMS
	TMEM171
	NRG1
	STEAP2
	ST3GAL2
	TSPAN18
	MX1
	KRTCAP3
	DUSP2
	HIST1H4H
	TAGLN2
	DUSP23
	SPATA2L
	MPZ
	CACHD1
	SV2A
	C2orf81
	ACTC1
	PTMS
	C1R
	ZDHHC1
	C16orf86
	RGS12
	FAM86C2P
	ABCG1
	TFF1
	SLC37A1
	PDE9A
	ITGB2
	MPZL3
	AZGP1
	USP41
	ZNF382
	FGF11
	CCDC78
	MEIOB
	AK4
	LAPTM5
	CAMK2N1
	ALPL
	NTNG1
	GBP2
	GFI1
	VCAM1
	OLFML2B
	KLHDC9
	DENND2D
	INHBB
	S100A9
	ALPP
	IGFBP7
	ADORA1
	TGFBR2
	FBLN2
	NUAK2
	AIM2
	FABP1
	PTX3
	CXCL5
	RPL39L
	MFI2
	PITX2
	EDIL3
	EGFLAM
	FOXQ1
	T
	GALNT10
	COL1A2
	TNFRSF11B
	NOS3
	CTHRC1
	ZMAT4
	MAMDC2
	ALDH1A1
	CLDN3
	CRYL1
	DACT1
	TC2N
	IFI27
	TCP11L2
	SPRED1
	GLB1L3
	GPT2
	CKB
	DCHS1
	RAG1
	CYB5R2
	WDR72
	PKD1L2
	ZSCAN21
	CENPV
	RRAD
	ATF7IP2
	ZNF667-AS1
	MESP1
	ANPEP
	RCCD1
	EVA1C
	TEF
	UGT1A6
	TPM4
	JSRP1
	MVD
	SPATA33
	TUBA1A
	ZNF283
	C19orf33
	NXN
	SRR
	KLK5
	KLK6
	ANGPTL4
	IGFBP6
	GHDC
	ENTPD3
	SCARA3
	TTC39C
	FILIP1L
	SCNN1B
	GBX2
	SLC20A2
	PKIG
	TSPAN5
	STXBP6
	LGALS9
	ATF5
	CPT1C
	DTWD2
	ZNF32
	NRG4
	TMEM42
	CHRNB1
	ADRA1B
	FABP6
	FABP4
	FOS
	METTL7B
	KRT4
	ELOVL6
	IRX2
	GTSF1
	RASA4B
	KCNS3
	GPR37
	TANC2
	PDGFD
	PKIA
	TADA3
	LRG1
	NPTX1
	CHST11
	KRT13
	KRT20
	LPAR3
	FGG
	PIK3CD
	TCEA2
	LGALS4
	NINJ2
	MIR31HG
	SCG2
	EPHX4
	ORMDL3
	KRCC1
	CD8B
	SNTB1
	MUCL1
	EFEMP2
	BNC2
	RHOD
	ABLIM3
	SYT12
	C11orf86
	AGR3
	PTPRM
	NABP1
	HEG1
	JUP
	C1QTNF1
	TNK1
	PHLDA3
	IL20RB
	SLCO2A1
	FGFBP3
	SEZ6L2
	CHST1
	PHYHD1
	LPL
	UCP2
	SFN
	LRRN1
	NUPR1
	SPHK1
	SYNE3
	MYO1D
	BDNF
	BASP1
	C8orf4
	MUC20
	HCG4
	DLGAP1-AS1
	HIC1
	JUN
	STAP2
	RNF212
	RP11-169K16.8
	FAM132B
	ZHX2
	CPNE7
	TMEM52
	MSC
	VWA1
	CIITA
	ARL14
	APOBEC3B
	CITED4
	TDRP
	FGD6
	C17orf104
	C11orf71
	BHLHA15
	MB21D2
	ZFP82
	NQO1
	C6orf223
	CLDN7
	HIST2H4B
	BACE2
	SYNM
	FIGN
	KBTBD3
	PGBD4
	MXRA7
	SATB1
	EPHB3
	NDN
	TSKU
	CRIP2
	CADM1
	CAMK1D
	LYSMD4
	FAM46C
	FAM101B
	UPP1
	HIST2H4A
	NPW
	ADRA2C
	FAM132A
	GOLGA6L4
	OAF
	ALDH1A3
	PROS1
	CEND1
	LPAR5
	CLDN6
	OSBP2
	SORCS2
	FLRT2
	ANO9
	IFITM2
	TNFAIP2
	SFTPA2
	L3MBTL1
	DLK1
	PRAME
	KCNQ5
	LEMD1
	KRT5
	WWOX
	GPAT2
	GABRA5
	BACE1
	THBS2
	PRR5
	KRT14
	GCNT1
	RDM1
	SAMD11
	TMSB4XP8
	HIST1H1C
	DMBT1
	DNER
	WNT7B
	SBK1
	HBA2
	DPYD
	PARVB
	TMSB4XP2
	ZNF573
	SH2D5
	SYCP2
	S100A4
	SRGAP3
	ZNF774
	EVL
	TPK1
	SLC6A9
	C1orf186
	CACNA1H
	MMP1
	TCF4
	S100A2
	ZFP28
	HCAR1
	ZNF429
	ANXA6
	SLC6A17
	ZNF772
	ZNF655
	STMN3
	HIST1H2BH
	SLC2A10
	HOXA4
	MFAP5
	SERPINB2
	DPP4
	NMB
	ZNF461
	S100A6
	MBP
	DSCR8
	LPAR1
	SULT1C2
	SLC29A3
	HOXC4
	TPM2
	ZNF808
	NBR2
	APCDD1L
	RASGEF1A
	DZIP3
	TBKBP1
	RNU1-85P
	SNORA65
	SNORA23
	RNU4-2
	SAMD5
	HIST2H2AA4
	HIST2H3PS2
	RBM20
	SNHG5
	C2orf72
	NPY4R
	GPRIN2
	TCEA3
	HSD17B8
	COL5A2
	HLA-DRA
	DFNB59
	HSPA1A
	HLA-F
	CASC10
	SYCE1L
	CCDC144NL
	TECPR1
	KRT81
	SNURF
	RBAKDN
	RP11-686O6.2

## Sheet: Neratinib
	Responsive genes		gene	locus	promoter					gene	locus	enahncer				gene	locus	TFBS
1	CFLAR		CFLAR	2:201982773;2:201982980;2:201983002;2:201983054	chr2:201981268-201983268					PRSS3	9:33750377;9:33750402;9:33750403	chr9:33749843-33754000				FOSL2	2:112814142;2:129079473;2:129079481;2:240196861;2:240196870;2:240196877;2:240196952;2:240196959	chr2:112813581-112814555;chr2:112814046-112814261;chr2:112814063-112814210;chr2:129079405-129079665;chr2:240196715-240197386;chr2:240196904-240197170
2	SLC7A2		TMEM132A	11:60691880;11:60691883;11:60691888	chr11:60689912-60691912					PPP2R2C	4:6564275;4:6564493	chr4:6564258-6564658				FOXA2	20:30158796;20:30158827;20:30158833;20:52209733;20:52209735;20:52209749;20:52209756	chr20:30158746-30159036;chr20:52209691-52210379
3	PDK4		PRSS21	16:2865376	chr16:2865163-2867163					SLC1A3	5:36242294;5:36242309	chr5:36238911-36243574				RFX5	1:109969377;1:155145481;1:155145497;1:155145520;1:161135656;1:161135798;1:171751288;1:233751065;1:241804176;1:241804189;1:241804190;1:26361547;1:27189648;1:27189649;1:53743972;1:53744000;1:78147933;1:78148029;1:78148037;1:87800836	chr1:109968395-109969619;chr1:109968653-109969528;chr1:109968908-109969676;chr1:109968919-109969552;chr1:109969064-109969481;chr1:109969070-109969410;chr1:155145329-155145977;chr1:155145359-155146000;chr1:161135600-161136560;chr1:161135614-161136477;chr1:161135782-161136425;chr1:171749259-171751703;chr1:233750509-233751653;chr1:241803181-241805739;chr1:26361234-26363215;chr1:27189040-27189853;chr…
4	COPZ2		PRSS3	9:33750377;9:33750402;9:33750403	chr9:33748463-33750463;chr9:33748818-33750818					DSP	6:7541549;6:7541569	chr6:7540481-7555695
5	CRLF1		EYA2	20:45523187;20:45523204;20:45523212;20:45523251;20:45523252;20:45523254	chr20:45521262-45523262					SUSD2	22:24181090	chr22:24180296-24182200
6	YBX2		CRMP1	4:5893365;4:5896275;4:5896494	chr4:5891953-5893953;chr4:5894810-5896810					LAMA1	18:7117556;18:7117558;18:7117561	chr18:7116996-7118357
7	TMEM132A		PPP2R2C	4:6566777	chr4:6565327-6567327					NRSN2	20:308534;20:308557	chr20:307967-312164
8	SCIN		FBLN1	22:45898110;22:45898180;22:45898191;22:45898218;22:45898235;22:45898296;22:45898307;22:45898314	chr22:45896718-45898718					ST3GAL3	1:43473360	chr1:43471188-43477944
9	PRSS21		NEBL	10:21463524;10:21463542;10:21463563;10:21463568;10:21463741	chr10:21463116-21465116					GLUL	1:182359744;1:182359805;1:182359876	chr1:182359246-182359949
10	PROM1		EBF4	20:2672039	chr20:2671523-2673523					TRIM29	11:120195963;11:120195966;11:120195969;11:120196003;11:120196016;11:120196018	chr11:120195339-120202709
11	PAX6		RGS17	6:153453031;6:153453035	chr6:153452389-153454389					ADAMTS12	5:33892243	chr5:33888601-33893612
12	CELSR3		DSP	6:7541549;6:7541569	chr6:7539869-7541869					ANKH	5:14871806;5:14871807;5:14871827	chr5:14868048-14873519
13	IL32		TPTEP1	22:17082038;22:17082042;22:17082046	chr22:17080800-17082800					MSX1	4:4866365;4:4866383;4:4866386;4:4866536;4:4866778;4:4866931;4:4866946;4:4866947	chr4:4864494-4867911
14	TRAF3IP3		NEFH	22:29875931;22:29875943;22:29875946;22:29875948;22:29875954;22:29875976	chr22:29874180-29876180					RBM47	4:40632524;4:40632526;4:40632530;4:40632548	chr4:40625388-40632600
15	FUZ		BMP7	20:55842376	chr20:55841707-55843707					AKR1E2	10:4868328;10:4868329;10:4868331;10:4868333	chr10:4866923-4868556
16	PRSS3		PLCB4	20:9048375;20:9048384;20:9048434;20:9048445;20:9049134;20:9049160;20:9049180;20:9049188;20:9049195	chr20:9047700-9049700					PCDH7	4:30719695;4:30719730;4:30719735;4:30719743;4:30720323;4:30720333	chr4:30716184-30723392
17	MRC2		LIPG	18:47087077;18:47087083;18:47087103	chr18:47086426-47088426					SERPINB9	6:2903298;6:2903309;6:2903317;6:2903373;6:2903389;6:2903398;6:2903526;6:2903530	chr6:2897633-2903916
18	TSPAN9		KATNAL1	13:30881879	chr13:30881191-30883191;chr13:30881624-30883624					IRX2	5:2751705;5:2751711;5:2751714	chr5:2746360-2753888
19	ALOX5		LMF1	16:1032675;16:1032680	chr16:1031318-1033318					SPSB1	1:9414388;1:9428089;1:9428106	chr1:9411802-9415290;chr1:9425202-9430409
20	MVP		CPPED1	16:12899245	chr16:12897744-12899744					PTPRM	18:7567799;18:7567804;18:7568794;18:7568800	chr18:7565980-7569472
21	CNTN1		SFRP1	8:41167893;8:41167901;8:41168838;8:41168883;8:41168894	chr8:41166990-41168990					IFITM1	11:315318;11:315319;11:318269	chr11:311376-318360
22	CYP24A1		TUSC3	8:15397007;8:15397021	chr8:15395595-15397595					HIST1H4J	6:27806422;6:27806445;6:27807012	chr6:27805755-27818474
23	SNAI2		LHX2	9:126773247;9:126773256	chr9:126771888-126773888					ZNF568	19:36128068	chr19:36127202-36129900
24	SAMD4A		PARD6B	20:49346984;20:49346985;20:49346996	chr20:49346080-49348080					TPM2	9:35488186;9:35488214;9:35691285	chr9:35487768-35493221;chr9:35679739-35692495
25	PLEKHB1		AHNAK	11:62314663;11:62314874;11:62314876;11:62314881	chr11:62314332-62316332					TUSC1	9:25678463;9:25678464;9:25678485	chr9:25676848-25679228
26	NLRP2		BMP4	14:54421574;14:54421578;14:54421593;14:54421605	chr14:54421270-54423270					HLA-A	6:28954293	chr6:28952675-28954799
27	SLC45A4		CCDC136	7:128431798;7:128431802;7:128431901	chr7:128430049-128432049					ADAT3	19:1865828	chr19:1851002-1865946
28	VIM		PXDN	2:1749394;2:1749712;2:1749730;2:1749768;2:1749965	chr2:1748291-1750291					MEG3	14:101176629;14:101177445;14:101177458	chr14:101176372-101178360
29	IKZF2		SAMD10	20:62611135;20:62611233;20:62611274	chr20:62610995-62612995					IFI30	19:18402115;19:18402128;19:18402129;19:18402142;19:18402147;19:18402259;19:18402275;19:18402276;19:18402285	chr19:18401291-18404101
30	VCAN		H19	11:2019080	chr11:2019065-2021065
31	AIFM2		ASS1	9:133319866;9:133319871	chr9:133318093-133320093
32	CP		KHDRBS3	8:136467876;8:136467881;8:136467891;8:136468770	chr8:136467715-136469715
33	CC2D2A		ZNF132	19:58951757	chr19:58951589-58953589
34	LMO3		RAMP1	2:238768081;2:238768098;2:238768102	chr2:238766186-238768186
35	COL9A2		SPG20	13:36920919;13:36920925;13:36920933	chr13:36920646-36922646
36	NFE2L3		BIVM	13:103450957;13:103450963;13:103450966	chr13:103449398-103451398
37	LAMC3		PSAT1	9:80911725;9:80911736	chr9:80909990-80911990
38	CYBA		KRT7	12:52626748;12:52626772	chr12:52624953-52626953
39	NNAT		GLUL	1:182360638	chr1:182360539-182362539
40	PLEKHH1		GYPC	2:127413505	chr2:127411510-127413510
41	ATP9A		ZNF365	10:64133813;10:64133815	chr10:64131915-64133915
42	SERPINB3		DNAJA4	15:78556457;15:78556468;15:78556475;15:78556500;15:78556503;15:78556553;15:78556755;15:78556759;15:78556763;15:78556766;15:78557142;15:78557154;15:78557370;15:78557383	chr15:78554486-78556486;chr15:78554988-78556988;chr15:78556559-78558559
43	DGKG		TMEM61	1:55445808;1:55445837;1:55446055;1:55446075;1:55446088;1:55446093;1:55446171;1:55446176	chr1:55444464-55446464
44	SLC2A3		ADAMTS12	5:33892243	chr5:33892124-33894124
45	CDH3		TDRD9	14:104394100;14:104394103	chr14:104392816-104394816
46	AHRR		MX1	21:42797918;21:42797939	chr21:42795957-42797957
47	ST3GAL6		LY6E	8:144098437;8:144098459	chr8:144097901-144099901
48	LPAR2		MEIOB	16:1922299;16:1922306;16:1922401;16:1922418;16:1922423;16:1922425;16:1922426	chr16:1922102-1924102;chr16:1922179-1924179
49	EYA2		PDPN	1:13909744;1:13909788;1:13910245;1:13910249	chr1:13908251-13910251;chr1:13909966-13911966
50	SYT1		CCDC74A	2:132285335;2:132285348;2:132285357	chr2:132283406-132285406
51	REEP1		EIF4E3	3:71803876;3:71803891;3:71803896;3:71803905	chr3:71802775-71804775;chr3:71803534-71805534
52	KCNAB2		IGFBP7	4:57976699;4:57976702;4:57976713;4:57976721	chr4:57976551-57978551
53	NEDD4		RBM47	4:40632524;4:40632526;4:40632530;4:40632548	chr4:40631883-40633883
54	OSBPL3		PITX2	4:111544325	chr4:111544254-111546254
55	LMCD1		SHROOM1	5:132166671;5:132166679;5:132166697	chr5:132166590-132168590
56	SLC6A15		FABP5	8:82192589;8:82192647;8:82192664;8:82192668	chr8:82190717-82192717
57	CRMP1		AKR1E2	10:4868328;10:4868329;10:4868331;10:4868333	chr10:4866368-4868368
58	PTGS2		HTRA1	10:124220726;10:124220729	chr10:124219040-124221040
59	PPP2R2C		NPNT	4:106816439;4:106816453	chr4:106814596-106816596
60	CA12		PCSK9	1:55504790;1:55504944;1:55504945;1:55504971;1:55504986;1:55505009;1:55505011;1:55505012;1:55505096	chr1:55503148-55505148;chr1:55503894-55505894
61	SEMA3A		PCDH7	4:30720323;4:30720333	chr4:30720029-30722029;chr4:30720036-30722036
62	SEMA3C		GPR27	3:71802176;3:71802625;3:71802627;3:71802646	chr3:71801200-71803200
63	FOSL2		LRRC8E	19:7953321;19:7953324;19:7953329;19:7953335	chr19:7951389-7953389
64	FSCN1		SNTB1	8:121824672;8:121824678	chr8:121824309-121826309
65	MOCOS		EGFL7	9:139559806	chr9:139558223-139560223
66	PLXNA2		DLK1	14:101192860;14:101192871;14:101192895;14:101192914;14:101192925	chr14:101191201-101193201
67	RAP1GAP		FAM92A1	8:94712187;8:94712396;8:94712404	chr8:94710734-94712734
68	FGFR1		SLC25A29	14:100773595;14:100773600;14:100773606	chr14:100772884-100774884
69	FBLN1		HIST1H4J	6:27791595	chr6:27789902-27791902
70	NEBL		ZNF695	1:247173003	chr1:247171395-247173395
71	HOXA9		ZNF568	19:37407119;19:37407124	chr19:37405230-37407230
72	EDN1		TPM2	9:35691285	chr9:35690053-35692053
73	TP53INP2		TUSC1	9:25679915	chr9:25678856-25680856
74	SLC1A3		HLA-E	6:30455946;6:30455964;6:30456331;6:30456340	chr6:30455182-30457182
75	LXN		RNF208	9:140116040;9:140116048;9:140116115;9:140116120;9:140116137;9:140116206;9:140116225	chr9:140115775-140117775
76	RAPGEF3		MEG3	14:101291856;14:101291994;14:101291997;14:101291998;14:101292196;14:101292200;14:101292201;14:101292208	chr14:101290444-101292444;chr14:101290468-101292468
77	LRRC16A		IFI30	19:18283235;19:18283353;19:18283354;19:18284566;19:18284577;19:18284583;19:18284586	chr19:18282589-18284589
	EPB41L2
	SERTAD4
	SEMA5B
	PLOD1
	P2RX5
	ZNF671
	CD59
	CD82
	CEACAM6
	LAT2
	TMPRSS11E
	MMP2
	PTHLH
	SLC4A11
	EBF4
	OAS1
	OTUB2
	LYZ
	CHRD
	FLT3LG
	DLL3
	POU4F3
	NRCAM
	ITGA6
	RGS17
	SLC7A8
	COL9A3
	TGFB2
	MAP3K1
	CYP26A1
	DSP
	SYDE2
	CEP170B
	SUSD2
	SEC14L2
	GGT1
	MFNG
	TPTEP1
	TIMP3
	NEFH
	RASD2
	PDGFB
	FAM118A
	COCH
	PYGL
	DDHD1
	DAAM1
	PLTP
	CD40
	BMP7
	SLCO4A1
	PTK6
	PLCB4
	TNNC2
	LIPG
	LAMA1
	KLF5
	ARHGEF7
	DGKH
	KATNAL1
	DHRS12
	NME3
	NDRG4
	LMF1
	CRYM
	CPPED1
	QPRT
	SYT17
	BMF
	SGK3
	PDGFRL
	SFRP1
	SPAG1
	TUSC3
	TLE6
	ZFR2
	TJP3
	ETFB
	FAM83E
	TMEM59L
	LSR
	CADM4
	PON3
	ITGB8
	PTN
	MET
	LFNG
	CPVL
	CHN2
	GRB10
	COBL
	PCOLCE
	PPP1R17
	SERPINE1
	C1GALT1
	SFRP4
	BLVRA
	SLC1A1
	LHX2
	ELAVL2
	TWIST1
	PLAU
	BICC1
	SARDH
	DBH
	NMI
	G0S2
	RAB38
	OBSL1
	PARD6B
	PPP4R1L
	COL21A1
	RUNX2
	CXCL6
	AHNAK
	EFNB2
	BMP4
	SOX9
	C3
	FOXA2
	NRSN2
	BMP2
	MMP24
	ST3GAL3
	HIVEP3
	TSPAN8
	TUBA4A
	SPINK2
	CDC42EP1
	LIF
	VGF
	CCDC136
	AP1M2
	RNASE1
	CDO1
	SYT5
	BST2
	PXDN
	SAMD10
	H19
	COL5A1
	ASS1
	SYNE1
	BPIFA2
	C1QL1
	SH3BP5
	ANO1
	RARA
	KHDRBS3
	ZNF132
	RAMP1
	RSG1
	CHI3L1
	TMCC2
	SPG20
	MYO18B
	NTS
	ARNTL
	MICALCL
	TTC9
	CAMK1
	GSTM3
	VAV3
	NOTCH2
	FKBP11
	GRHL1
	FST
	DSC3
	DTNA
	DAGLA
	SLC43A3
	BIVM
	SLC37A2
	CTSL
	FAM189A2
	PSAT1
	TAOK3
	PRR5L
	KRT7
	KCNH3
	MAP7
	PKIB
	GLUL
	FAM129A
	DOCK10
	ALDH1L2
	CKAP4
	TBC1D4
	LCP1
	SCRN1
	IL6
	ALPK3
	CIB2
	LIMD2
	GYPC
	TMOD1
	IL33
	FGFBP1
	SLCO2B1
	IL18BP
	SYTL2
	DDX60
	MMP7
	TRIM29
	TMPRSS13
	CASP1
	THBS1
	UACA
	SMAD6
	STRA6
	SLC44A5
	CGREF1
	KHK
	CALHM2
	ZNF365
	PRKG2
	LEF1
	FBN2
	GABARAPL1
	KIF21A
	SLC38A4
	PHLDA1
	ASCL1
	MBNL2
	RAB15
	DISP2
	DNAJA4
	CYP1A1
	PCSK6
	RHCG
	DET1
	CLEC18B
	KIFC3
	KSR1
	RAB40B
	ERBB2
	GRB7
	FKBP10
	RCN3
	PGD
	TMEM61
	CELSR2
	PVRL4
	RFX5
	SUSD4
	DUSP10
	S100A7
	ITPKB
	CNIH3
	DLX1
	PHOSPHO2
	IQSEC1
	LRIG1
	COL8A1
	AMT
	TM4SF19
	PDGFC
	PLK2
	PIK3R1
	CXCL14
	RNF145
	ZNF300
	CPLX2
	GFOD1
	DOK3
	VWDE
	SDK1
	ST18
	VLDLR
	PLIN2
	CDKN2A
	NR6A1
	NOTCH1
	ANKRD1
	INA
	FUOM
	ADAM12
	DCUN1D2
	LYPD1
	IL18
	THRB
	KCTD14
	ADAMTS12
	FLI1
	GFRA1
	SCHIP1
	RABGAP1L
	CCDC74B
	GUCY1A2
	SPARCL1
	PANK1
	STK32B
	ZIC1
	DAB2
	PTPRR
	LURAP1L
	CACNA2D1
	CHST9
	ANKH
	NRGN
	UCHL1
	CXADR
	VOPP1
	SLC7A7
	FAM126B
	ELMSAN1
	KCNMA1
	NAA11
	CLDN8
	ANKRD9
	TDRD9
	HKDC1
	FBXO32
	MMP14
	FZD1
	SUSD3
	CLEC18A
	CLEC18C
	KIT
	TSPAN18
	MX1
	SLC34A2
	DPYSL5
	WDR66
	FAM86C1
	DYNC1I1
	ZSCAN12
	SLC45A3
	CDA
	TNNI1
	TUBBP5
	SIM2
	PTMS
	HK2
	C1R
	TFF3
	TMPRSS3
	ZNF714
	LY6E
	DMKN
	ZNF382
	PGAP3
	TBC1D3G
	FMNL3
	MEIOB
	PDPN
	NEXN
	AKNAD1
	GBP2
	DENND2D
	PKDCC
	PIGR
	REL
	CCDC74A
	SGPP2
	INHBB
	MSX1
	S100A11
	GPR155
	CLDN1
	COL6A3
	EIF4E3
	IGFBP7
	FBLN2
	SERPINI1
	PTX3
	RBM47
	CXCL5
	RPL39L
	PITX2
	PRSS12
	HPGD
	FAM198B
	FAM160A1
	C5orf63
	SPINK1
	SHROOM1
	KIAA1324L
	ZNF704
	FABP5
	DLC1
	ADCY1
	ALDH7A1
	RASEF
	GKAP1
	AQP3
	SLC16A9
	GJB2
	AKR1E2
	NDRG2
	RNASE7
	HTRA1
	AMN
	GABRB3
	CYB5A
	CYB5R2
	WDR72
	TRIM66
	PKD1L2
	RIMKLB
	PLEKHA7
	C16orf45
	KIAA0101
	ELFN2
	GREM1
	TMEM92
	UGT1A6
	PRR15L
	RBFOX3
	AC104389.28
	CORO6
	RHEBL1
	KIFC2
	SRR
	HSD11B1L
	KLK5
	KLK6
	KLK11
	ZNF558
	GHDC
	KIF5C
	SDPR
	SERINC2
	NPNT
	FSTL5
	INPP5D
	PARM1
	AFAP1L2
	CPT1C
	PCSK9
	RAB3B
	EFNA1
	ADRB2
	STK32A
	CRADD
	COL22A1
	ANTXR1
	MT1E
	PCDH7
	ADRA1B
	FAXDC2
	FABP4
	SEMA3E
	KRT4
	COX7B2
	SERPINB9
	IRX2
	GTSF1
	RASA4B
	GPR37
	SDR16C5
	GPR27
	PYGO1
	LRRC8E
	CSN3
	CDC42BPG
	NAT1
	KRT20
	MCC
	HOPX
	FGA
	SPSB1
	ZIK1
	RP11-443P15.2
	MIR31HG
	SCG2
	SYNPO
	SNTB1
	ISG20
	ATOH1
	ARNT2
	IL17D
	MUCL1
	EFEMP2
	SLFN11
	RAB37
	EGFL7
	GXYLT2
	RHOD
	GLRX
	SYT12
	DMRT2
	SNCG
	PTPRM
	PHLDA3
	CCDC149
	RTKN2
	SGK223
	C1orf116
	GJC1
	ABAT
	GDPGP1
	TP53TG3
	NPBWR1
	FAM3B
	NPW
	TACSTD2
	PKP3
	PROS1
	DUSP8
	SLITRK6
	OR7E14P
	CLDN6
	SORCS2
	ROBO2
	ADSSL1
	TNFAIP2
	HS6ST3
	SMYD3
	KRT6B
	DLK1
	AHNAK2
	PBX1
	KCNQ5
	ADAMTSL5
	IFITM1
	GPAT2
	GABRA5
	NUDT17
	2021-09-10
	KRT16
	PDZD7
	EMID1
	ESPN
	BCAM
	SAMD11
	PALM3
	AGRN
	LINC00265
	PRKAR1B
	AGAP4
	FAM25C
	HES4
	IGFL1
	FAM92A1
	ZP3
	CERKL
	COL25A1
	C15orf52
	S100A16
	BCL2L15
	FZD9
	TMSB4XP2
	ZNF548
	USP32P1
	KCTD21
	FAM111B
	S100A13
	DPY19L2P1
	ALG1L
	RASSF10
	SERPINA3
	S100A4
	CTSE
	SRGAP3
	SFTA2
	CD55
	NPIPB15
	ZNF605
	TPK1
	SULF2
	ZNF502
	TTC30B
	ZNF418
	S100A2
	TLE1
	ARID5A
	ANXA6
	SLC25A29
	ACSL5
	HIST1H4J
	SYNGAP1
	SVIL
	ZNF860
	HIST1H3D
	MAP3K5
	PDGFA
	ZNF695
	SIPA1L1
	HOXA4
	DMBX1
	ENPP1
	DPP4
	FAM114A1
	S100A10
	S100A6
	DNM3
	DSCR8
	MB
	ZNF334
	ZNF568
	TPM2
	FLVCR1-AS1
	MMP17
	TUSC1
	ABCA4
	SMOC1
	LRIG2
	SFMBT2
	TGM2
	SNORA65
	SNORA71C
	RNVU1-6
	SNORA23
	CAPN8
	FAM229B
	RBM20
	TCEA3
	HSD17B8
	SLC44A4
	CARD16
	APOM
	HLA-C
	PSORS1C1
	HLA-E
	C9orf135
	RPSAP58
	MT1A
	CFI
	KRT81
	TP53TG3C
	SERPINB5
	HLA-A
	RP11-553A10.1
	LNP1
	SNORA5A
	SNORA7B
	RNVU1-4
	RNU1-106P
	GPX3
	TRBC2
	C17orf51
	RNF208
	DENND1B
	RP4-765C7.2
	LBH
	ADAT3
	S1PR3
	PIGCP1
	ZNF888
	EMP2
	PPM1N
	LTB4R
	LTB4R2
	HBE1
	AP1G2
	COLCA2
	RP11-252A24.2
	KANSL1-AS1
	MEG3
	NPIPA8
	C22orf29
	MUC5AC
	ATAD3C
	IFI30
	TENM3
	FAM19A5

## Sheet: Lapatinib
	Responsive genes		gene	locus	promoter					gene	locus	enahncer						gene	locus	TFBS
1	ACSM3		PRSS21	16:2865376;16:2865377	chr16:2865163-2867163					CD9	12:6166523;12:6166543;12:6166796;12:6166813;12:6166817;12:6166917;12:6167110;12:6307793;12:6307794;12:6307953;12:6309219;12:6309227;12:6309238;12:6309246;12:6309779;12:6309781;12:6309788;12:6309846	chr12:6166153-6170026;chr12:6307002-6314029						EGR1	5:137610319;5:137610321;5:137610333;5:68462690;5:68462711	chr5:137610118-137610383;chr5:137610122-137610398;chr5:137610128-137610368;chr5:137610194-137610421;chr5:68462635-68462796
2	CRLF1		MAPK8IP2	22:51038535;22:51038538	chr22:51037113-51039113					EHD2	19:48364277;19:48364296	chr19:48362644-48365341						SAP30	4:10117348;4:111539329;4:111539340;4:111539346;4:113444372;4:113444379;4:115520223;4:13551526;4:152246218;4:174421471;4:174421482;4:1770825;4:1771200;4:30719695;4:40632524;4:40632526;4:40632530;4:40632548;4:57521507;4:57521545;4:57521632;4:57521653;4:57775710;4:57775758;4:57775771;4:57976149;4:5893365;4:5893366;4:5896494;4:74719215;4:77819793;4:77819800;4:77819801;4:81257781;4:81257785	chr4:10112247-10123944;chr4:10116542-10119812;chr4:10117122-10117632;chr4:10117199-10117972;chr4:111526767-111570747;chr4:111539327-111539557;chr4:113425702-113454446;chr4:113444106-113445645;chr4:115519832-115520938;chr4:13516478-13557807;chr4:152244826-152247984;chr4:174411063-174456674;chr4:1766203-1804681;chr4:30717534-30725811;chr4:40624894-40637463;chr4:57521270-57521726;chr4:57773581-57776…
3	YBX2		CD9	12:6307793;12:6307794;12:6307953;12:6309219;12:6309227;12:6309238;12:6309246	chr12:6307481-6309481					SH3YL1	2:214422	chr2:214401-214600
4	TNFRSF12A		GSTO2	10:106034772	chr10:106032886-106034886					TRIT1	1:39980450	chr1:39979129-39982706
5	PRSS21		MGLL	3:127541817;3:127541832	chr3:127541725-127543725					PTHLH	12:28128003;12:28128008;12:28128028;12:28128029	chr12:28126172-28133017
6	PAX6		FBLN1	22:45898110;22:45898180;22:45898191;22:45898218;22:45898235;22:45898296;22:45898308;22:45898400;22:45898427	chr22:45896718-45898718					PYCARD	16:31213445;16:31213568;16:31213571;16:31213578;16:31213579;16:31213586	chr16:31213140-31216382
7	BAIAP3		NEBL	10:21463741	chr10:21463116-21465116					AMH	19:2252082;19:2252086;19:2252118;19:2475641;19:2478310;19:2478318	chr19:2247129-2254667;chr19:2474623-2480246
8	ADAM22		EBF4	20:2672039	chr20:2671523-2673523					DDX58	9:33076670;9:33076678	chr9:33075396-33077550
9	IL32		RGS17	6:153453031;6:153453035	chr6:153452389-153454389					SCNN1A	12:6961317;12:6961337;12:6961338	chr12:6940697-6966619
10	MAPK8IP2		TPTEP1	22:17082038;22:17082042;22:17082046	chr22:17080800-17082800					RBM24	6:17280551;6:17280572;6:17280926	chr6:17276504-17284100
11	TRAF3IP3		NEFH	22:29875931;22:29875943;22:29875946;22:29875948	chr22:29874180-29876180					GLIPR2	9:36035988;9:36165226;9:36165384;9:36165385	chr9:36035949-36040549;chr9:36160874-36167199
12	POMT2		KCTD17	22:37447558;22:37447566;22:37447656;22:37447662	chr22:37445775-37447775					SH2D3A	19:6767957;19:6767981;19:6768059;19:6768109;19:6768112;19:6768839;19:6768853;19:6769143;19:6769419	chr19:6765025-6769539
13	MLXIPL		GALNT16	14:69726314	chr14:69724680-69726680					UBE2M	19:58555177;19:58555334;19:58555361	chr19:58553537-58560688
14	DYRK4		PLCB4	20:9048375;20:9048384;20:9048434;20:9048445;20:9049134;20:9049160;20:9049180;20:9049188	chr20:9047700-9049700					MAP1B	5:72526067;5:72526086;5:72526088;5:72526173;5:72526174	chr5:72524836-72526883
15	CD9		LIPG	18:47087077	chr18:47086426-47088426					ENOSF1	18:711972;18:711981;18:711994	chr18:708677-713378
16	HIVEP2		GSDMD	8:144640310;8:144640379	chr8:144638476-144640476					FOXF2	6:1383710;6:1383728;6:1383730;6:1383734;6:1385210;6:1388245;6:1389532	chr6:1381646-1397255
17	MRC2		LHX2	9:126773247;9:126773256;9:126773268	chr9:126771888-126773888					TRIM29	11:120195963;11:120195966;11:120195969	chr11:120195339-120202709
18	ALOX5		MAP3K8	10:30722105	chr10:30720949-30722949					ARHGEF19	1:16162766	chr1:16161594-16166199
19	SLC7A14		GLRB	4:157997447;4:157997527;4:157997544	chr4:157995554-157997554					TIAM2	6:155316317;6:155316326	chr6:155312924-155317016
20	PGM3		HTATIP2	11:20385363;11:20385371;11:20385374	chr11:20383402-20385402;chr11:20383686-20385686					OBSCN	1:228463543;1:228463545;1:228473140;1:228473153	chr1:228463476-228465899;chr1:228472002-228473200
21	GPRC5A		ACCS	11:44087685;11:44087713	chr11:44085728-44087728;chr11:44085811-44087811					GRHL3	1:24195095	chr1:24195070-24196200
22	CD74		ULBP1	6:150283557;6:150283621;6:150284688;6:150284701;6:150284707	chr6:150283142-150285142					RBM47	4:40632524;4:40632530;4:40632548	chr4:40625388-40632600
23	HGF		RBM24	6:17280551;6:17280572;6:17280926	chr6:17279808-17281808;chr6:17280294-17282294					FOXQ1	6:1316786;6:1316787	chr6:1309797-1316944
24	OSBPL5		CDK18	1:205473547;1:205473548	chr1:205471683-205473683					CPLX1	4:782305	chr4:780355-783913
25	NLRP2		CNNM1	10:101088828;10:101088840	chr10:101086855-101088855					IRX2	5:2751705;5:2751711	chr5:2746360-2753888
26	EHD2		PARD6B	20:49346984;20:49346985	chr20:49346080-49348080					CRIPAK	4:1513149;4:1513208	chr4:1512255-1513872
27	VIM		SH2D3A	19:6767957;19:6767981;19:6768059;19:6768109;19:6768112;19:6768839;19:6768853;19:6769143;19:6769419	chr19:6767523-6769523					HIST3H2A	1:228646927;1:228646946;1:228646950;1:228646953	chr1:228646632-228649442
28	KCNG1		CCDC136	7:128431798;7:128431802	chr7:128430049-128432049					IFITM2	11:318269;11:354216;11:354220;11:355557;11:355581;11:355692;11:355711;11:355859	chr11:311376-318360;chr11:352202-358026
29	AGPAT4		PXDN	2:1749712;2:1749730	chr2:1748291-1750291					IFITM1	11:315318;11:318269	chr11:311376-318360
30	FUT8		H19	11:2019080;11:2019090;11:2019091	chr11:2019065-2021065					C5orf38	5:2751705;5:2751711;5:2751714;5:2751762;5:2751897;5:2751901;5:2755439;5:2755442;5:2755452;5:2755767	chr5:2746360-2753888;chr5:2754518-2757320
31	SH3YL1		RFTN1	3:16555362;3:16555364	chr3:16555222-16557222					SIRPA	20:1873958;20:1873975	chr20:1869802-1877001
32	ZIC2		PDE6B	4:617701;4:617845;4:617846;4:617889;4:617901;4:619314	chr4:617362-619362
33	TRIT1		GRP	18:56887030;18:56887098;18:56887348;18:56887351;18:56887352	chr18:56885399-56887399
34	CTNNA1		FHOD3	18:33876856;18:33876871;18:33876994	chr18:33875658-33877658
35	ARAP2		COL4A2	13:110958893;13:110958895;13:110958904;13:110958941;13:110958946;13:110958956;13:110958967	chr13:110957630-110959630
36	CC2D2A		PSAT1	9:80911725;9:80911736;9:80911749;9:80911801	chr9:80909990-80911990
37	COL9A2		TBX3	12:115121972;12:115121976;12:115121984;12:115122002;12:115122021	chr12:115121969-115123969
38	EPN3		KRT7	12:52626748	chr12:52624953-52626953
39	LTBP1		DYSF	2:71692287;2:71692547;2:71692569;2:71692570;2:71692666	chr2:71691831-71693831
40	NFE2L3		WNT10A	2:219744626;2:219744634;2:219745251	chr2:219743254-219745254
41	LIMA1		CYP27A1	2:219646460	chr2:219644471-219646471
42	SLC4A8		GYPC	2:127413505	chr2:127411510-127413510
43	NNAT		FOXF2	6:1388245;6:1389532	chr6:1388068-1390068
44	HHAT		HERC5	4:89377912;4:89377916	chr4:89376267-89378267
45	PLEKHH1		COL6A2	21:47517355;21:47517485;21:47517512	chr21:47516032-47518032
46	GALC		THNSL2	2:88469720;2:88469730	chr2:88467813-88469813
47	DCBLD2		SLC22A3	6:160768929;6:160769019	chr6:160767404-160769404
48	TBXAS1		STOM	9:124132773;9:124132785	chr9:124132582-124134582
49	SLC2A3		MARVELD2	5:68710818;5:68710831;5:68710864;5:68710873	chr5:68708938-68710938
50	COL11A1		ASAP1	8:131456244;8:131456246;8:131456266;8:131456267	chr8:131455906-131457906
51	MPC1		PRKCA	17:64298868;17:64298874;17:64298879;17:64298885	chr17:64296925-64298925
52	DGAT2		CA10	17:50236736;17:50236749	chr17:50236132-50238132
53	AHRR		MARVELD1	10:99473110;10:99473119	chr10:99471464-99473464
54	SLC12A2		RBPMS	8:30241538;8:30241548	chr8:30240016-30242016
55	GSTO2		TMEM171	5:72415570;5:72415646	chr5:72414387-72416387
56	TBC1D1		DUSP2	2:96812038;2:96812044;2:96812049	chr2:96811179-96813179
57	FECH		LY6E	8:144098437;8:144098459	chr8:144097901-144099901
58	NAV3		DHRS3	1:12679099;1:12679102;1:12679103	chr1:12677737-12679737
59	CLEC2D		IGFBP7	4:57976699;4:57976702	chr4:57976551-57978551
60	ST6GALNAC2		TRIM46	1:155146241	chr1:155144262-155146262;chr1:155145229-155147229
61	VASH1		NFASC	1:204797410;1:204797641;1:204797643;1:204797650	chr1:204795781-204797781
62	LMCD1		RBM47	4:40632524;4:40632530;4:40632548	chr4:40631883-40633883
63	SLC6A15		FABP5	8:82192589;8:82192641;8:82192647	chr8:82190717-82192717
64	MPP5		ARHGAP42	11:100557784;11:100557789;11:100557797;11:100557808;11:100557810	chr11:100556406-100558406
65	MOV10L1		GPRC5B	16:19896645;16:19896657	chr16:19896151-19898151
66	PANX2		RAB26	16:2197972;16:2197995;16:2197996;16:2198014;16:2198076;16:2198081	chr16:2196650-2198650
67	GSDMB		PCSK9	1:55504790;1:55504944;1:55504945;1:55504971;1:55504986;1:55505009	chr1:55503148-55505148;chr1:55503894-55505894
68	PTGS2		PRKCDBP	11:6341889;11:6341896	chr11:6341740-6343740
69	ST6GAL1		LRRC8E	19:7953321;19:7953324	chr19:7951389-7953389
70	CA12		SH3RF3	2:109744724;2:109744729	chr2:109743996-109745996
71	MGLL		C1QTNF1	17:77019488;17:77019692;17:77019944;17:77020025;17:77020038;17:77020041;17:77021036;17:77021162	chr17:77018157-77020157;chr17:77019744-77021744
72	NUAK1		SPHK1	17:74379123	chr17:74378689-74380689
73	ZNF532		FAM109B	22:42469811;22:42469812;22:42469976;22:42469977;22:42469989;22:42470036;22:42470174;22:42470179;22:42470185	chr22:42468254-42470254
74	CELSR1		PVRL3	3:110790848;3:110790869	chr3:110789014-110791014
75	ADD2		MAMDC4	9:139745152;9:139745153;9:139745159;9:139745288;9:139745291;9:139745312	chr9:139744818-139746818
76	FSCN1		FJX1	11:35639225;11:35639653;11:35639671	chr11:35637734-35639734
77	MOCOS		MYADM	19:54370624;19:54372431;19:54372476;19:54372557;19:54372573	chr19:54369118-54371118;chr19:54369798-54371798;chr19:54370644-54372644
78	PLXNA2		MAPK15	8:144797964	chr8:144796506-144798506
79	MCAM		F2R	5:76010444;5:76011475;5:76011491;5:76011741;5:76011750	chr5:76009867-76011867
80	FGFR1		HIST3H2A	1:228646927;1:228646946;1:228646950;1:228646953	chr1:228645560-228647560
81	FBLN1		UPP1	7:48127925;7:48127997;7:48128010	chr7:48126199-48128199;chr7:48126736-48128736;chr7:48126808-48128808;chr7:48126850-48128850
82	PIAS2		CA13	8:86157621;8:86157633;8:86157641	chr8:86155715-86157715
83	LAMP3		PRAME	22:22901597	chr22:22900174-22902174
84	NEBL		C5orf38	5:2751705;5:2751711;5:2751714;5:2751762;5:2751897;5:2751901	chr5:2750261-2752261
85	HOXA9		SLC6A17	1:110693064;1:110693069	chr1:110691131-110693131
86	TP53INP2		SIRPA	20:1873958;20:1873975	chr20:1872812-1874812;chr20:1873424-1875424;chr20:1873825-1875825
87	CLUL1		LPAR1	9:113800677;9:113800682;9:113800684;9:113801159	chr9:113800365-113802365
88	SLC1A3		RPS6KL1	14:75389480;14:75389542;14:75389568;14:75389585;14:75389596;14:75389686	chr14:75389145-75391145
89	CDC14A		NRARP	9:140197419;9:140197661;9:140197789;9:140197790	chr9:140196703-140198703
90	RAPGEF3		TPM2	9:35691285;9:35691292	chr9:35690053-35692053
	MOXD1
	MOK
	ARG2
	STK17B
	C1QTNF3
	SERTAD4
	SEMA5B
	GRHL2
	OXCT1
	GSTP1
	COL16A1
	IGSF9
	AKR1B1
	WNT11
	CEACAM6
	HSD17B14
	FTL
	TMPRSS11E
	MMP2
	PTHLH
	FER1L4
	EBF4
	DZANK1
	PITPNM2
	MYO15A
	NLRP1
	RGS17
	PHGDH
	TGFB2
	DFNB31
	BAMBI
	IFT74
	ERMP1
	GGT1
	PRODH
	ADRBK2
	GCAT
	TPTEP1
	RAB36
	NEFH
	HMOX1
	APOL1
	PNPLA3
	KCTD17
	COCH
	GSTZ1
	TMED8
	DAAM1
	SPTLC2
	GALNT16
	NFATC4
	CD40
	RIMS4
	PABPC1L
	SALL4
	SLC17A9
	EEF1A2
	RASSF2
	PLCB4
	ZNF516
	LIPG
	NALCN
	MSLN
	GDPD3
	NDRG4
	HAS3
	COTL1
	CRISPLD2
	NME4
	METRN
	PYCARD
	SYT17
	CTSH
	JPH1
	GSDMD
	NEFM
	AMH
	TLE6
	TJP3
	MEIS3
	FAM83E
	TMEM59L
	ZNF85
	TFPI2
	HOXA1
	CPED1
	FAM188B
	NPTX2
	SERPINE1
	AHR
	LHX2
	FKTN
	CNTNAP3
	CORO2A
	PTGR1
	ENG
	DDX58
	SH3GL2
	PALD1
	CDH23
	SFXN3
	SH3PXD2A
	MAP3K8
	RAPGEFL1
	TRIM16L
	ENO3
	RASD1
	COL1A1
	MAP2K6
	PMP22
	RAB34
	PHOX2B
	NMU
	MAPK10
	CPE
	GLRB
	FAM149A
	HTATIP2
	VWA5A
	DTX4
	ST3GAL4
	CPT1A
	FOLR1
	ACCS
	POU2AF1
	PPM1H
	ELK3
	PARP11
	SH2B3
	SCNN1A
	LTBR
	MGP
	RASAL1
	ENO2
	NT5DC3
	SLCO1B3
	NEDD9
	ULBP1
	SOD2
	ICK
	RBM24
	MDFI
	FAM46A
	PCDHB2
	SPARC
	PDE8B
	ST8SIA4
	STC2
	CLDN16
	AMOTL2
	SLC25A36
	KAT2B
	WNT5A
	COL7A1
	FGF12
	C3orf14
	NEK11
	ARHGEF26
	TNNC1
	CCL20
	TFCP2L1
	ITGB6
	ITGA4
	EFEMP1
	FN1
	MLPH
	ID2
	KYNU
	RND3
	EPAS1
	ATP6V1B1
	PARD3B
	C1orf21
	LEPR
	PLA2G4A
	RGS2
	NID1
	MYCL
	RIMS3
	ST6GALNAC5
	MFAP2
	GBP3
	CDK18
	ID3
	SLC2A1
	PIK3R3
	2021-03-02
	MREG
	LRMP
	PLAGL1
	CTGF
	ABCG2
	SPP1
	FAM47E-STBD1
	GALNT12
	PGF
	NEK9
	LTBP2
	MLH3
	ZC2HC1C
	KLHL29
	FKBP1B
	OGFRL1
	CNNM1
	CAAP1
	KIAA1217
	EGR1
	ZNF549
	A1BG
	PDZRN3
	CSTA
	LDB3
	TWIST1
	GLIPR2
	SPINK4
	CALD1
	SFTPA1
	PLAU
	SRGN
	ATP7B
	NR4A1
	RAB38
	OBSL1
	PI3
	SLPI
	PARD6B
	SH3TC1
	MT1G
	SOX9
	C1orf61
	SH2D3A
	GZF1
	LRRN4
	ID1
	IFI6
	ATG14
	HSPA2
	EDN2
	SYNGR3
	METTL25
	TNFRSF19
	GNG11
	APOL3
	DOCK4
	CCDC136
	SNRPN
	SOX15
	LRRC6
	AP1M2
	KLK10
	KLK8
	EGLN3
	RNASE1
	FOXJ1
	GADD45G
	KIF1A
	MLLT4
	PXDN
	OLFM1
	H19
	COL5A1
	UBE2M
	ZNF236
	ULBP2
	SYNE1
	BPIFA2
	RFTN1
	KCNC3
	NAPSA
	GFPT2
	MAP1B
	TNS4
	CLUHP3
	ENOSF1
	IQCA1
	SCLY
	PTPRE
	LANCL2
	ITGB4
	MATN2
	NES
	RAB25
	ALDH3B2
	VSTM2L
	MYH10
	CHI3L1
	TMCC2
	DCLK1
	PDE6B
	RARRES3
	IRAK2
	CAMK1
	GSTM1
	VAV3
	NOTCH2
	FKBP11
	SAA2
	FST
	NAV1
	GRP
	LRP4
	FHOD3
	SLC43A3
	FADS2
	COL4A2
	ANXA1
	PSAT1
	TBX3
	CD36
	EPHA7
	PRPH
	KRT7
	SEMA4F
	DYSF
	AGT
	FAM129A
	WNT10A
	CYP27A1
	USP44
	SLC41A2
	LCP1
	IGF2BP3
	GPNMB
	ALPK3
	CIB2
	GALNT5
	RASSF5
	GYPC
	RALGPS1
	DAB2IP
	GARNL3
	FOXF2
	TUBB2B
	SLCO2B1
	SYTL2
	RAB30
	SULF1
	DDX60
	TMPRSS4
	TRIM29
	CASP1
	THBS1
	PAQR5
	ITPKA
	UACA
	STRA6
	CGREF1
	CYP1B1
	CALHM2
	CARF
	ARHGAP24
	HERC5
	PRKG2
	RASGEF1B
	BMPR1B
	ANXA3
	FBN2
	B4GALNT3
	TMEM117
	CLSTN3
	LRIG3
	PHLDA1
	NOVA1
	RAB15
	LYSMD2
	SLC27A2
	BCL2A1
	TPM1
	CLEC18B
	CDH11
	CBLN2
	ERBB2
	FKBP10
	COL6A1
	COL6A2
	TM4SF5
	RCN3
	ARHGEF19
	CELSR2
	RGS5
	CGN
	SYT14
	WNT9A
	THNSL2
	TRPM8
	2021-03-04
	RBMS3
	LRIG1
	PHLDB2
	MUC4
	OCIAD2
	SCD5
	PDGFC
	CYP4V2
	ADAMTS16
	ARHGAP26
	TENM2
	DCDC2
	DOK3
	DAAM2
	TIAM2
	ZMYM4
	SLC22A3
	EGFR
	PSPH
	CSGALNACT1
	ADHFE1
	LRP12
	NFIB
	ZNF462
	STOM
	LCN2
	ANKRD1
	FUOM
	TENM4
	GLB1L2
	DOC2A
	HMGA2
	ARID5B
	GPM6A
	WDR17
	PPP1R1C
	IL18
	TEX9
	AKR1C2
	WWC2
	ACSL1
	CCL28
	SCHIP1
	LIX1L
	POU4F1
	PSTPIP2
	C18orf25
	SPOCK1
	GUCY1A2
	HOMER1
	CCDC50
	PLEKHH2
	WDR78
	ANKRD22
	FARP1
	PTPRK
	MARVELD2
	CLGN
	ASAP1
	CMTM7
	LURAP1L
	CNKSR3
	C7orf31
	PID1
	MCOLN2
	SEMA3D
	C16orf74
	PRKCA
	FAM167A
	OBSCN
	CNTNAP3B
	PDLIM3
	SORBS2
	ADAMTS1
	PPP4R1
	CCDC144B
	CA10
	VOPP1
	PROM2
	TTC39B
	MARVELD1
	SLC16A1
	PPARGC1B
	UGT2B4
	KCNMA1
	TIAM1
	SFXN2
	SH3RF2
	HKDC1
	UBE2L6
	LHFPL4
	SST
	NMNAT2
	RBPMS
	TMEM171
	MMP14
	CLEC18A
	CLEC18C
	KIT
	CACNA2D3
	TSPAN18
	SLC34A2
	KRTCAP3
	DUSP2
	GRHL3
	GALNT14
	RNF207
	AUTS2
	TAGLN2
	SLC45A3
	CDA
	MPZ
	CACHD1
	LAD1
	CBR3
	C2orf81
	SIM2
	TPPP3
	ZDHHC1
	NPR2
	TFF1
	SPATC1L
	AZGP1
	LY6K
	LY6E
	PGAP3
	SPC24
	IP6K3
	MEIOB
	CCDC64B
	ZG16B
	FGF19
	RAVER2
	FBLIM1
	DHRS3
	CAMK2N1
	FAM102B
	HENMT1
	AKNAD1
	GFI1
	NLRP3
	C1orf115
	VSNL1
	PDLIM5
	S100A9
	TGFA
	ANTXR2
	CLDN1
	IGFN1
	IGFBP7
	TRIM46
	FBLN2
	NFASC
	IFI16
	RPL22L1
	PTX3
	HESX1
	RBM47
	CXCL5
	SLC6A20
	LIPH
	RPL39L
	MFI2
	ERMAP
	PRSS12
	SAP30
	ITGA2
	EDIL3
	ERAP2
	FOXQ1
	MB21D1
	DCBLD1
	TMEM200A
	STXBP5
	FABP5
	DLC1
	TNFRSF11B
	KCNV1
	NOS3
	ZMAT4
	MAMDC2
	RASEF
	WBSCR27
	AQP3
	GJB2
	ARHGEF40
	VWA2
	ARHGAP42
	GPR176
	CKB
	LARP6
	CLMP
	CYB5A
	C11orf74
	TUB
	WDR72
	TRIM66
	SLC38A8
	RRAD
	LDHC
	KIAA0101
	ANPEP
	ELFN2
	MAP1A
	TMEM92
	PRR15L
	GPRC5B
	MYO5B
	TPM4
	JSRP1
	PPP1R14A
	NXN
	KLK1
	KLK5
	KLK6
	KRT80
	ZNF558
	RAB26
	SCARA3
	GNG4
	CMAHP
	SERINC2
	SLC16A4
	IL7R
	GSTM4
	FSTL5
	ZNF608
	CPLX1
	KLK7
	AFAP1L2
	ATF5
	PCSK9
	RAB3B
	COL22A1
	SPRR1A
	DTWD2
	ANTXR1
	HEXDC
	MT1E
	ROBO1
	TM4SF4
	KLF13
	CCDC144A
	FRMPD2
	SEMA3E
	KRT86
	NPAS2
	KISS1
	IRX2
	SIX2
	GTSF1
	DPY19L2P2
	SOCS6
	SDR16C5
	MTSS1
	GSTA4
	PRKCDBP
	LRRC8E
	FAM86JP
	PRKCE
	NPTX1
	CHST11
	KRT15
	KRT13
	LPAR3
	MAP6
	FGA
	P2RY6
	LRRC34
	ATOH1
	CLEC7A
	NEGR1
	ALG14
	SUCLG2
	IL17D
	SMPDL3A
	EFEMP2
	FAM71D
	METAP1D
	SH3RF3
	SNCG
	FAM86B3P
	SAA1
	C2orf70
	C1QTNF1
	C12orf66
	PHLDA3
	IL20RB
	GOLT1A
	SEZ6L2
	ASPHD1
	C1orf127
	PHYHD1
	CATSPER1
	ZNF519
	MCTP1
	UCP3
	UCP2
	RWDD4P2
	AIM1L
	MC5R
	GPX2
	SPHK1
	BNIP3
	B3GNT5
	BDNF
	BASP1
	LRRC37A3
	FUT2
	MUC20
	FAM109B
	NUDT4P1
	FZD8
	KCNA2
	IRX3
	CSTF2T
	CD163L1
	PVRL3
	AC108142.1
	MAMDC4
	DPY19L2
	PARD6G
	DNAJC22
	PARP10
	KCTD12
	TRIML2
	LDLRAD3
	FJX1
	GRM8
	ARL14
	MYADM
	CRIPAK
	C17orf104
	HCLS1
	NRIP1
	TMEM64
	S1PR5
	CLRN3
	OR51E1
	ARSJ
	HOXC10
	CAPS2
	MAPK15
	F2R
	HIST3H2A
	TMEM102
	DDX60L
	TNFSF15
	UBA7
	FAM87A
	NXPH4
	EPGN
	NDN
	BRICD5
	CADM1
	PCP4
	NKX2-5
	CCBE1
	EPHA10
	KIAA2026
	TP53TG3
	2021-03-11
	NOG
	UPP1
	MACC1
	B3GALT5
	NUDT14
	SMTN
	ALDH1A3
	ZDHHC23
	PKP3
	TXNRD2
	SLITRK6
	HIST2H2BE
	CLDN6
	SDR42E1
	JAG2
	CA13
	IFITM2
	PGBD2
	PPIL6
	SFTPA2
	TCN2
	ROR1
	OLFML2A
	EP400NL
	PRAME
	NAT8L
	IFITM1
	GPAT2
	THBS2
	C5orf38
	C1QL4
	CHCHD2P9
	SEMA4D
	CARD9
	DNER
	ARL4C
	WNT7B
	AGRN
	HEPACAM2
	LINC00265
	IGFL1
	ZP3
	NCCRP1
	C22orf34
	NANOS1
	S100A16
	LINC00319
	BCL2L15
	USP32P1
	FHIT
	ALG1L
	SERPINA3
	S100A4
	COLCA1
	EVL
	ZNF605
	ESRRG
	MME
	SULF2
	MMP1
	ZNF502
	TTC30B
	ADA
	LAMB3
	HIST3H2BB
	HCAR1
	CASP4
	IGF2R
	SLC6A17
	SERPINA1
	ZNF675
	PDGFA
	KCNMB2
	MFAP5
	DPP4
	FAM114A1
	LHFPL5
	TXNRD3
	OCLN
	FAM212B
	DNM3
	SIRPA
	LPAR1
	MB
	SVIP
	SULT1C2
	RPS6KL1
	FKBP1C
	HOXC4
	ZNF26
	NRARP
	TPM2
	MDM4
	CEP290
	EPS8L3
	ZNF521
	CCDC152
	GRK5
	SFMBT2
	SNORA71C
	SNORA5C
	RNU4-2
	C1orf95
	CAPN8
	SERTAD4-AS1
	C1orf53
	CENPW
	HIST2H3PS2
	GLYATL3
	HSD17B8
	DFNB59
	LAYN
	SLC44A4
	HSPA1B
	MICB
	RNF39
	CTC-308K20.1
	RANBP17
	RP11-15J10.1
	ZNF204P
	ARHGEF34P
	RPSAP58
	MT1A
	CFI
	KRT81
	TP53TG3D
	TP53TG3C
	ATP6AP1L
	RP11-284F21.9
	FGF14-AS2
	RP11-284F21.10
	XXbac-BPG252P9.9
	AFAP1-AS1
	RP4-548D19.3
	GAS6-AS2
	LL21NC02-1C16.2
	RP11-792A8.4
	LL22NC03-N14H11.1
	RP11-440D17.3

## Sheet: Gefitinib
	Responsive genes		gene	locus	promoter						gene	locus	enahncer				gene	locus	TFBS
1	SLC7A2		MYLIP	6:16128866;6:16128870	chr6:16127316-16129316						PRSS22	16:2903734;16:2903735;16:2903880;16:2906070;16:2906071;16:2906205;16:2906208;16:2907514;16:2907517;16:2907576;16:2907586;16:2907602	chr16:2903602-2907799				FOSL2	2:112814142;2:129079473;2:129079481;2:129079485;2:240196861;2:240196870;2:240196877;2:240196976;2:240196983;2:240196996;2:240197119	chr2:112813581-112814555;chr2:112814046-112814261;chr2:112814063-112814210;chr2:129079405-129079665;chr2:240196715-240197386;chr2:240196904-240197170
2	PRSS22		DKK3	11:12030722;11:12030731	chr11:12030186-12032186;chr11:12030629-12032629						FAM214B	9:35488186;9:35488214	chr9:35487768-35493221				GATA3	10:43277938;10:43277941;10:43277949;10:43332792;10:43332794;10:43332799;10:47008185;10:47008197;10:47008200;10:47008202;10:52834677;10:52834679;10:8089653;10:8089664;10:8095417;10:8095421;10:8095424;10:8095572;10:8097558;10:8097583;10:8097872;10:8102323;10:88163096	chr10:43277840-43278453;chr10:43332494-43332931;chr10:47007967-47008263;chr10:52834175-52834779;chr10:8088053-8090188;chr10:8089391-8091102;chr10:8095109-8098004;chr10:8095114-8097041;chr10:8101812-8102623;chr10:88162748-88163365
3	SKAP2		OPN3	1:241804176;1:241804406;1:241804422	chr1:241803701-241805701						MYLIP	6:16128866;6:16128870	chr6:16128379-16132359				FOXA2	20:30158796;20:30158827;20:30158833;20:52209733;20:52209735;20:52209749;20:52209756	chr20:30158746-30159036;chr20:52209691-52210379
4	FAM214B		PPP2R2C	4:6566777	chr4:6565327-6567327						NFIX	19:12978255	chr19:12977800-12978401				NR2F2	15:67813391;15:96866815;15:96873669	chr15:67812873-67814000;chr15:96866628-96867148;chr15:96873517-96874328
5	COPZ2		MGLL	3:127541817;3:127541832	chr3:127541725-127543725						DKK3	11:12030722;11:12030731	chr11:12029801-12030783				TEAD4	12:102513782;12:3067977;12:3067990;12:52627048;12:52627052;12:58258839;12:58259059;12:58259234;12:58259452;12:58259467;12:6309219;12:6309227;12:6309238;12:6649105;12:6649524;12:6649542;12:6649861;12:88974639	chr12:102513663-102514597;chr12:3067480-3069486;chr12:52626818-52627558;chr12:58258736-58259663;chr12:58258961-58259409;chr12:58258962-58259402;chr12:58258999-58259363;chr12:58259051-58259301;chr12:6308597-6309936;chr12:6647582-6650226;chr12:88974464-88974714
6	PRKAR2B		FBLN1	22:45898110;22:45898180;22:45898218	chr22:45896718-45898718						PPP2R2C	4:6564275	chr4:6564258-6564658
7	CRLF1		OSBPL6	2:179058471;2:179058547	chr2:179057207-179059207						EPB41L3	18:5542876;18:5543066;18:5629993;18:5630001;18:5630013;18:5630017;18:5630020;18:5630070	chr18:5542173-5544627;chr18:5626090-5630851
8	TMEM98		EPB41L3	18:5545242;18:5545392;18:5629993;18:5630001;18:5630013;18:5630017;18:5630020;18:5630070	chr18:5544309-5546309;chr18:5628990-5630990						C3orf18	3:50604609;3:50604742	chr3:50598964-50614009
9	ALDH3B1		RGS17	6:153453031;6:153453035	chr6:153452389-153454389						PALM	19:708398;19:708507;19:708541;19:708568;19:708671;19:708673;19:708681;19:708682;19:708709;19:708710;19:708726;19:708727	chr19:707227-708910
10	GGCT		PALM	19:708398;19:708507;19:708541;19:708568;19:708671;19:708673;19:708681;19:708682;19:708709;19:708710;19:708726;19:708727	chr19:706952-708952						FSD1	19:4360307	chr19:4359474-4362963
11	MARK4		TPTEP1	22:17082038;22:17082042;22:17082046	chr22:17080800-17082800						ADAP1	7:975656;7:975665;7:975678;7:975681;7:975990;7:976732;7:976739;7:976754;7:976758	chr7:971861-980626
12	PAX6		NEFH	22:29875931;22:29875943;22:29875946;22:29875948;22:29875954;22:29875976	chr22:29874180-29876180						NPDC1	9:137219218;9:137219221;9:137219222;9:137219246;9:137230496	chr9:137216433-137220126;chr9:137221486-137232704
13	MYLIP		KCTD17	22:37447558;22:37447566	chr22:37445775-37447775						GATA3	10:8076355;10:8076368;10:8097558;10:8097583;10:8097872;10:8098061	chr10:8074969-8076631;chr10:8097438-8098248
14	CELSR3		GALNT16	14:69726314;14:69726319;14:69726320	chr14:69724680-69726680						PRPH2	6:42694750;6:42694778;6:42694876;6:42694885;6:42694891;6:42695153;6:42695166	chr6:42691655-42695532
15	NFIX		PLCB4	20:9048375;20:9048384;20:9048445;20:9049134;20:9049160	chr20:9047700-9049700						REEP6	19:1503001;19:1503283	chr19:1502973-1504456
16	TRAF3IP3		LIPG	18:47087077	chr18:47086426-47088426						NQO2	6:2987708	chr6:2979320-2992919
17	FUZ		ACP5	19:11689380;19:11689477;19:11689481	chr19:11688553-11690553						TNFSF9	19:6528944;19:6529001;19:6530759;19:6661025;19:6661073;19:6661155	chr19:6527568-6533719;chr19:6660377-6664526
18	MRC2		RGCC	13:42029810	chr13:42029541-42031541						SH2D3A	19:6767957;19:6767981;19:6768059;19:6768839;19:6768853;19:6769143	chr19:6765025-6769539
19	SYT7		TUSC3	8:15397007;8:15397021	chr8:15395595-15397595						CBFA2T3	16:88978157;16:88978161;16:88978163;16:88999465;16:88999466;16:88999471;16:88999575;16:89000337;16:89000345	chr16:88967272-88979704;chr16:88999433-89000644
20	PLAUR		CAV1	7:116164762;7:116164767;7:116164774;7:116164924;7:116165143	chr7:116162838-116164838;chr7:116163062-116165062;chr7:116164346-116166346;chr7:116164411-116166411						UBE2M	19:58555177;19:58555334	chr19:58553537-58560688
21	ALOX5		NPDC1	9:139940788	chr9:139940676-139942676						USPL1	13:30690572;13:30690627;13:30690632	chr13:30689539-30691491
22	SLC7A14		GATA3	10:8095417;10:8095421;10:8095424;10:8095572	chr10:8094666-8096666						GLUL	1:182359744;1:182359805;1:182359876	chr1:182359246-182359949
23	ANGEL1		HTATIP2	11:20385363;11:20385371	chr11:20383402-20385402;chr11:20383686-20385686						DUSP23	1:159751096	chr1:159751038-159754188
24	CHDH		LOX	5:121413916;5:121413923;5:121413926	chr5:121412918-121414918						ANKRD33B	5:10563405;5:10564303	chr5:10562290-10568572
25	CYP24A1		AVPI1	10:99447567;10:99447568;10:99447585	chr10:99447015-99449015						ATF7IP2	16:10275487;16:10275494;16:10275499	chr16:10275004-10276285
26	SAMD4A		BMP4	14:54421574;14:54421579;14:54421593;14:54422754;14:54422757;14:54422765;14:54422766;14:54422770;14:54422773	chr14:54421270-54423270						IGF2	11:2026635;11:2026636;11:2032010	chr11:2026436-2032785
27	CPS1		TNFSF9	19:6530759	chr19:6529009-6531009						HIST1H2AE	6:26199382;6:26199384;6:26199405;6:26204516;6:26218212;6:26251516	chr6:26193488-26208095;chr6:26214313-26220778;chr6:26248916-26261823
28	NLRP2		SH2D3A	19:6767957;19:6767981;19:6768059;19:6768839;19:6768853;19:6769143	chr19:6767523-6769523						CPLX1	4:782305	chr4:780355-783913
29	SLC45A4		PXDN	2:1749394;2:1749712;2:1749730;2:1749768	chr2:1748291-1750291						IRX2	5:2751705	chr5:2746360-2753888
30	ABCC2		RFTN1	3:16555362;3:16555364;3:16555372	chr3:16555222-16557222						NINJ2	12:751142;12:751157;12:751168;12:751689;12:751692	chr12:749166-756118
31	PLEKHO1		RAMP1	2:238768081;2:238768098;2:238768102	chr2:238766186-238768186						MYADM	19:54022808	chr19:54017723-54024511
32	VIM		PDE6B	4:617701;4:617845;4:617846;4:617889;4:617901;4:619314	chr4:617362-619362
33	CD44		FHOD3	18:33876856;18:33876871	chr18:33875658-33877658
34	AGPAT4		BIVM	13:103450957;13:103450963;13:103450966	chr13:103449398-103451398
35	SLAMF7		TBX3	12:115121972;12:115121976;12:115121984	chr12:115121969-115123969
36	SH3YL1		SLC26A10	12:58012988;12:58013110;12:58013119	chr12:58011692-58013692
37	DAPK2		GLUL	1:182360638;1:182360646;1:182361501;1:182361508;1:182361510	chr1:182360539-182362539;chr1:182361341-182363341
38	PARP3		HERC5	4:89377912;4:89377916;4:89377918;4:89377921	chr4:89376267-89378267
39	TNC		COL6A2	21:47517355;21:47517485;21:47517512	chr21:47516032-47518032
40	AIFM2		THNSL2	2:88469720;2:88469730;2:88469731	chr2:88467813-88469813
41	CTNNA1		ZNF462	9:109625198;9:109625201	chr9:109623377-109625377
42	CP		FAM81A	15:59730330;15:59730339;15:59730346;15:59730348	chr15:59728371-59730371
43	LMO3		DZIP1L	3:137834708;3:137834712	chr3:137834451-137836451
44	DKK3		ACE	17:61553864;17:61553870;17:61553947	chr17:61552421-61554421
45	NFE2L3		ZYX	7:143077030;7:143077049	chr7:143076359-143078359
46	SLC4A8		IGFBP7	4:57976699;4:57976702	chr4:57976551-57978551
47	CYBA		ANKRD33B	5:10563405;5:10564303	chr5:10562434-10564434
48	NNAT		TMEM200A	6:130686492	chr6:130685425-130687425
49	KCNQ1		FABP5	8:82192589;8:82192641	chr8:82190717-82192717
50	OPN3		ZNF667-AS1	19:56988703;19:56988709;19:56988721;19:56988734;19:56989148;19:56989236;19:56989252;19:56989253;19:56989262	chr19:56987242-56989242;chr19:56987492-56989492
51	PLEKHH1		GPRC5B	16:19896645;16:19896657;16:19896663;16:19896667;16:19896693;16:19896708	chr16:19896151-19898151
52	TRAF3IP2		RAB26	16:2197972;16:2197995;16:2197996	chr16:2196650-2198650
53	TMCC3		ADAL	15:43622079;15:43622089;15:43622091;15:43622100	chr15:43620553-43622553
54	TARBP1		PCSK9	1:55504790;1:55504944;1:55504945;1:55504971	chr1:55503148-55505148;chr1:55503894-55505894
55	SLC2A3		GPR27	3:71802176;3:71802184;3:71802600	chr3:71801200-71803200
56	AHRR		LRRC8E	19:7953321;19:7953324;19:7953329	chr19:7951389-7953389
57	SPA17		NRTN	19:5823787;19:5823791;19:5823792	chr19:5821817-5823817
58	HIPK2		SNTB1	8:121824672;8:121824678;8:121824682	chr8:121824309-121826309
59	SLC12A2		C1QTNF1	17:77020025;17:77020038;17:77021036;17:77021162	chr17:77018157-77020157;chr17:77019744-77021744
60	FAM107B		MSRB3	12:65672105;12:65672207	chr12:65670422-65672422;chr12:65670766-65672766
61	CLDN18		FOXG1	14:29234671;14:29234816;14:29234830;14:29235640;14:29235677	chr14:29234277-29236277
62	FGFR2		VWA1	1:1368976;1:1369158;1:1369572;1:1369593;1:1369594;1:1369616	chr1:1368902-1370902
63	EML1		FJX1	11:35639225	chr11:35637734-35639734
64	FECH		LBX2	2:74730777;2:74730779;2:74730804;2:74730826;2:74730831	chr2:74730443-74732443
65	SYT1		MYADM	19:54370624;19:54370648;19:54370649;19:54372431;19:54372476;19:54372557	chr19:54369118-54371118;chr19:54369798-54371798;chr19:54370644-54372644
66	CLEC2D		HIST3H2A	1:228646927;1:228646946;1:228646950	chr1:228645560-228647560
67	TGFBR3		FAM110C	2:46888;2:46904	chr2:46588-48588
68	ST6GALNAC1		TMEM121	14:105991990;14:105992116	chr14:105990952-105992952
69	ST6GALNAC2		IRF7	11:616000;11:616013;11:616016	chr11:615728-617728;chr11:615999-617999
70	OSBPL3		NR2F2	15:96873669;15:96874476;15:96875676;15:96875681	chr15:96872110-96874110;chr15:96873793-96875793;chr15:96874568-96876568
71	RPS6KA2		DLK1	14:101192860;14:101192871;14:101192883;14:101192895	chr14:101191201-101193201
72	LMCD1		C5orf38	5:2751705;5:2751711;5:2751714;5:2751762;5:2751897;5:2751901	chr5:2750261-2752261
73	MPP5		PRR5	22:45097757;22:45097768	chr22:45096077-45098077
74	DHRS9		ZFP28	19:57049676;19:57049680;19:57049689	chr19:57048316-57050316
75	PTGS2		ZNF429	19:21688412	chr19:21686436-21688436
76	FRY		UAP1L1	9:139971590	chr9:139969952-139971952
77	PPP2R2C		HIST1H2BH	6:26251516	chr6:26249878-26251878
78	TEAD2		TEAD4	12:3067977;12:3067990	chr12:3066477-3068477;chr12:3066747-3068747
79	MGLL		ZNF677	19:53758121	chr19:53758111-53760111
80	SLC24A1		MBP	18:74846592	chr18:74844774-74846774
81	SEMA3A		ZNF544	19:58739778	chr19:58738069-58740069
82	ADD2		NRARP	9:140197419	chr9:140196703-140198703
83	FNDC3B		FAM169A	5:74162580;5:74162594;5:74162602;5:74162603;5:74162621	chr5:74162212-74164212
84	FOSL2		TOX	8:60032943;8:60032959	chr8:60031767-60033767
85	MOCOS		RUSC2	9:35488186;9:35488214;9:35489728;9:35489750;9:35489792;9:35489799	chr9:35487948-35489948
86	FGFR1		HLA-H	6:29855119	chr6:29853536-29855536
87	FBLN1		ATP6V0CP3	6:42694750;6:42694778;6:42694876;6:42694879;6:42694885;6:42695153	chr6:42693313-42695313
88	LAMP3		MEG3	14:101291856;14:101291994	chr14:101290444-101292444;chr14:101290468-101292468
	HOXA9
	CDH17
	OSBPL6
	SLC1A3
	LXN
	CDC14A
	DDX43
	MOK
	ARG2
	PHLPP1
	EPB41L3
	SEMA5B
	COL16A1
	MGST2
	SNX10
	CEACAM6
	HSD17B14
	MMP2
	LPCAT2
	NID2
	FER1L4
	C3orf18
	DZANK1
	OAS1
	FXYD3
	PCBP4
	LYZ
	PITPNM2
	MYO15A
	RGS17
	SLC7A8
	PHGDH
	COL9A3
	SEMA4G
	BAMBI
	SYDE2
	ABLIM1
	PALM
	GSTT2
	SEC14L2
	PRODH
	MFNG
	ADRBK2
	LGALS1
	GCAT
	TPTEP1
	NEFH
	APOL1
	KCTD17
	COCH
	PYGL
	GSTZ1
	TMED8
	SPTLC2
	GALNT16
	REC8
	PLTP
	CD40
	EEF1A2
	RASSF2
	FERMT1
	PLCB4
	MAP1LC3A
	LIPG
	ACP5
	RGCC
	MSLN
	NDRG4
	FOXF1
	METRN
	QPRT
	CTSH
	TTC23
	HOMER2
	EHD4
	TRPA1
	DECR1
	CALB1
	SH2D4A
	NEFM
	TUSC3
	NEFL
	FGL1
	LIN7B
	CASP14
	SLC1A6
	FSD1
	TJP3
	FAM83E
	PLEKHA4
	MAST1
	PDE4C
	CDK6
	STEAP1B
	ADAP1
	CAV1
	HOXA1
	HOXA3
	LFNG
	HOXA13
	COBL
	TFR2
	PLOD3
	MEOX2
	TRIM14
	ENG
	TESK1
	LHX3
	GLIS3
	NPDC1
	PDLIM1
	GATA3
	TRDMT1
	PALD1
	CDH23
	SFXN3
	SH3PXD2A
	TSPAN14
	ENO3
	ICAM2
	COL1A1
	ALDOC
	RAB34
	NMU
	TRIM2
	HGFAC
	HTATIP2
	ST3GAL4
	CPT1A
	MDK
	GPRC5D
	TBC1D30
	ADTRP
	MAN1A1
	MDGA1
	ICK
	EYA4
	PRPH2
	EXOC2
	TBX18
	NNT
	LOX
	SPARC
	PCDHB3
	PCDHB5
	PDE8B
	HAVCR1
	PDE4D
	ST8SIA4
	LIFR
	DPYSL3
	RBP1
	WNT5A
	FGF12
	C3orf14
	UPK1B
	NEK11
	ARHGEF26
	REEP6
	CLIP4
	TLX2
	DOK1
	FN1
	IGFBP2
	EFHD1
	ST3GAL5
	CHST10
	MLPH
	SLC1A4
	KYNU
	WIPF1
	ATP6V1B1
	DHCR24
	ERRFI1
	FBXO2
	DNAJC6
	OLFML3
	NID1
	ST6GALNAC5
	MFAP2
	RGS4
	GBP3
	ID3
	PIK3R3
	2021-03-02
	TNNT2
	NRP2
	CTGF
	SLC16A7
	GDA
	GALNT12
	ONECUT2
	PGF
	IFI27L2
	NEK9
	ACOT2
	LTBP2
	FKBP1B
	EPCAM
	OGFRL1
	IFIT2
	AVPI1
	KIAA1217
	DNAJC15
	ZFP30
	ZNF549
	ZSCAN18
	RASL11A
	PAEP
	LDB3
	EEPD1
	TWIST1
	CALD1
	BICC1
	NEUROD4
	SARDH
	DBH
	G0S2
	INHA
	OBSL1
	SLPI
	CHST8
	PAIP2B
	HIF3A
	PEX6
	NQO2
	HIST1H3B
	RUNX2
	EREG
	MT1G
	EFNB2
	SOX21
	BMP4
	C1orf61
	PAX8
	TNFSF9
	SH2D3A
	FOXA2
	NAPB
	BMP2
	FLRT3
	ID1
	NR1D1
	STAT5A
	IFI6
	L3HYPDH
	AIF1L
	EDN2
	TSPAN8
	FBXL16
	MACF1
	ADORA2A
	APOL2
	DOCK4
	VGF
	ALDH1A2
	IVD
	LOXL1
	SOX15
	MTUS1
	RNASE1
	SYT5
	CBFA2T3
	PVRL2
	APOE
	DPP6
	BST2
	STK33
	PXDN
	GDF15
	OLFM1
	H19
	COL5A1
	UBE2M
	ZNF236
	PRR7
	RFTN1
	ANO1
	KREMEN2
	LGALS3
	RAMP1
	SERPINF1
	LANCL2
	NES
	VSTM2L
	BHMT2
	FBXO44
	USPL1
	WASF3
	CHI3L1
	TMCC2
	DCLK1
	PDE6B
	AMPD3
	DUSP26
	CAMK1
	GSTM1
	NOTCH2
	FKBP11
	SPOCD1
	FHOD3
	SLC43A3
	TCN1
	BIVM
	CTSL
	TBX3
	OASL
	KHDC1
	CGA
	SLC26A10
	MAP7
	SEMA4F
	GLUL
	SPRY2
	LCP1
	SCRN1
	IGF2BP3
	RAPGEF5
	ALPK3
	LIMD2
	SCN7A
	DAB2IP
	KIF12
	GARNL3
	CTSV
	IL33
	TMEM8B
	ARRB1
	SYTL2
	RAB30
	SULF1
	FXYD6
	THBS1
	PAQR5
	UACA
	STRA6
	CGREF1
	TMEM180
	HERC5
	RASGEF1B
	FRAS1
	ANXA3
	ERP27
	GABARAPL1
	CLSTN3
	ASCL1
	ITGB7
	KCNH5
	SLC27A2
	TPM1
	ARRDC4
	MCTP2
	MARVELD3
	NLRC5
	CDH11
	TP53
	CBLN2
	IGFBP4
	FKBP10
	PRDM15
	TMEM91
	COL6A1
	COL6A2
	SIK1
	TRPM2
	PADI3
	RXRG
	CRABP2
	ECM1
	CGN
	AC027612.6
	SCCPDH
	SOX13
	ETNK2
	PLEKHA6
	GALM
	THNSL2
	GALNT13
	LRIG1
	COL8A1
	PHLDB2
	BOC
	MUC4
	PLAC8
	PDGFC
	ADAMTS16
	PLK2
	SSBP2
	CPLX2
	DOK3
	ANO7
	RNF217
	EGFR
	IGFBP3
	PSPH
	TRIM55
	MAL2
	GSDMC
	CER1
	PLIN2
	ZNF462
	SNX30
	NR6A1
	LCN2
	ANKRD1
	INA
	SLX4IP
	CSRP2BP
	KIRREL3
	KIAA1755
	DOC2A
	HMGA2
	LYPD1
	FREM2
	FOXO1
	ABCB9
	ANK3
	CCDC3
	ADAM8
	SCHIP1
	LIX1L
	CCDC50
	GJA1
	RASGRP3
	RAB3C
	DAB2
	LINC00467
	CMTM7
	CNKSR3
	MCOLN2
	HS3ST3A1
	AK5
	NRGN
	UCHL1
	CNTNAP3B
	C21orf91
	ACSS1
	VOPP1
	PROM2
	AK9
	SETD9
	FMN2
	TIAM1
	FUT6
	SH3RF2
	FBXO43
	HKDC1
	FBXO32
	SST
	SUSD3
	KIT
	CACNA2D3
	FAM81A
	CREB3L1
	C2CD2
	MEGF11
	KRTCAP3
	GALNT14
	DZIP1L
	FAIM
	RNF207
	TSPAN33
	AHCYL2
	DNAH3
	TAGLN2
	DUSP23
	CDA
	CACHD1
	LAD1
	SIM2
	ACE
	TPPP3
	ZDHHC1
	ZYX
	LYPD5
	TMPRSS3
	PDE9A
	ZNF208
	SLC2A6
	S100A1
	TNFSF13
	CCDC78
	CCDC64B
	ZG16B
	LRP5
	PDZK1IP1
	ELAVL4
	FBLIM1
	LAPTM5
	CAMK2N1
	MXRA8
	FAM102B
	HENMT1
	PDLIM5
	IVL
	S100A9
	ANTXR2
	CLDN1
	IGFBP7
	FBLN2
	IFI16
	CADPS
	TM4SF18
	SLC6A20
	LIPH
	RPL39L
	BDH2
	PRSS12
	ITGA2
	ANKRD33B
	CMBL
	EGFLAM
	GRIK2
	FABP7
	CITED2
	TMEM200A
	DACT2
	MYOZ3
	KIAA1324L
	ZNF704
	FABP5
	COL1A2
	TNFRSF11B
	KIAA1161
	ALDH1A1
	ZNF488
	GJB2
	EML5
	NGB
	OTX2
	BEND7
	ARHGEF40
	ANKRD2
	ABTB2
	FBN1
	LARP6
	GABRB3
	CLMP
	NETO1
	SERPINB7
	TRIM66
	RIMKLB
	CDH16
	SPDYE6
	ATF7IP2
	NNMT
	ZNF667-AS1
	ELFN2
	C15orf48
	PIP5KL1
	CERCAM
	UGT1A6
	GPRC5B
	IGF2
	ZNF229
	PPP1R14A
	PSCA
	LY6D
	SERPINF2
	SRR
	KLK6
	KRT80
	ANGPTL4
	MGAT5B
	RAB26
	CCDC88B
	GNG4
	HIST1H2AE
	ACOX2
	CMAHP
	SDPR
	GSTM4
	ADAL
	INPP5D
	CPLX1
	IRS1
	PARM1
	ATF5
	PCSK9
	RP11-231C14.4
	COL22A1
	SDC2
	MUC15
	MT1E
	ROBO1
	CCDC144A
	FABP6
	FRMPD2
	FOS
	LRRN2
	NPAS2
	KISS1
	CDH2
	IRX2
	GTSF1
	DPY19L2P2
	SDR16C5
	HTRA3
	CEL
	GPR27
	PSG6
	ZNF415
	LRRC8E
	NRTN
	PRKCE
	C10orf35
	NPTX1
	GAA
	KRT13
	MCC
	SLC25A33
	ENC1
	ZIK1
	PLEKHG5
	VAT1L
	GATM
	NHLH1
	NINJ2
	FRMD5
	SYNPO
	LAMB2
	SLFN12
	CALB2
	SNTB1
	ISG20
	MACROD2
	ARNT2
	FGGY
	IL17D
	MUCL1
	EFEMP2
	METAP1D
	EGFL7
	ABLIM3
	GLRX
	SNCG
	SNX33
	CCDC106
	SUSD5
	C1QTNF1
	MSRB3
	TMEM81
	GOLGA8A
	PHYHD1
	CST6
	PCSK1
	UCP2
	FOXG1
	BNIP3
	BDNF
	BASP1
	METRNL
	GRIN1
	C8orf4
	FBXO46
	ACER2
	ZDHHC22
	TRIM72
	ST8SIA3
	PGBD5
	CD163L1
	AC108142.1
	DPY19L2
	ZNF518B
	KDELC2
	RNF212
	PRSS36
	FAM132B
	CPNE7
	EXOC3L1
	TRIML2
	TMTC2
	C17orf96
	CTGLF12P
	VWA1
	FJX1
	MKRN3
	LBX2
	ARL14
	MYADM
	NRIP1
	BHLHA15
	HIST1H2AC
	SSTR2
	TMEM64
	GPR157
	HOXC10
	MAP6D1
	D2HGDH
	MUC16
	PENK
	HIST3H2A
	ZNF467
	SOX2
	TMEM45A
	IBA57
	HIST2H3D
	TP53TG3
	ZNF703
	SLC35F3
	KCTD8
	DUSP5P1
	ADRA2C
	ALDH1A3
	PLA2G6
	NCMAP
	TMEM173
	RNLS
	FAM110C
	SDR42E1
	TMEM121
	FAM43A
	IFITM2
	RGPD2
	C12orf56
	SOCS1
	TCN2
	IRF7
	L3MBTL1
	NR2F2
	DLK1
	NPIPB4
	SDHAP3
	C15orf41
	GPAT2
	PRELID2
	C5orf38
	FAM86B1
	NF2
	HPDL
	PDE2A
	PRR5
	TRABD2A
	TNFRSF18
	RP11-195F19.5
	MT1X
	BCAM
	DCC
	RGPD1
	KBTBD12
	PEAR1
	DMBT1
	RINL
	RP11-43F13.1
	LINC00265
	HYKK
	IGFL1
	CENPP
	PRR19
	ZP3
	C15orf52
	TEKT4P2
	BCL2L15
	USP32P1
	RELN
	VSTM1
	ZKSCAN3
	SYCP2
	SFTA2
	ZNF836
	CD55
	NTNG2
	EVL
	SULT1A1
	MME
	SULF2
	S100A2
	ZFP28
	SCN8A
	LAMB3
	HIST3H2BB
	KPNA5
	PCDHB16
	ZNF585A
	ZNF429
	ZNF470
	ANXA6
	ZNF772
	ACSL5
	SULT1A2
	HIST1H4J
	UAP1L1
	ADARB1
	HIST1H2BH
	HOXA4
	DPP4
	ZNF433
	NMB
	FAM114A1
	PSAP
	CCDC180
	GPAA1
	ZNF790
	TEAD4
	ZNF677
	MBP
	MB
	ZNF544
	NRARP
	FLVCR1-AS1
	MMP17
	ABCA4
	ECI2
	UNC13B
	COLGALT2
	FAM169A
	ZNF521
	TOX
	RUSC2
	CCDC152
	POU3F3
	TGM2
	SNORA38B
	SNORA5C
	SNORA23
	RNU4-2
	C1orf95
	SERTAD4-AS1
	C6orf99
	TCEA3
	HSD17B8
	SLC44A4
	C6orf48
	HSPA1A
	ZNF814
	CTD-2514C3.1
	RP11-15J10.1
	RP11-204M4.2
	MROH6
	PSG5
	MT1A
	KRT6A
	KRT81
	TP53TG3C
	CPT1B
	SMN2
	DENND6B
	HLA-H
	RP11-553A10.1
	RNU1-1
	RNVU1-18
	SNORA5A
	RNVU1-7
	RNVU1-14
	RNU1-3
	SNORD94
	GPX3
	DIO2
	SNORA53
	KRTAP2-3
	RP4-765C7.2
	HMGB3P6
	RP11-55K22.2
	ATP6V0CP3
	SIPA1
	RP11-112J1.1
	LBH
	TREX1
	S1PR3
	LTB4R
	LIPE-AS1
	LTB4R2
	ZNF726
	KANSL1-AS1
	MEG3
	RP11-27I1.4
	HLA-F-AS1
	ARHGEF28
	RPL13P12
	CD27-AS1
	MUC5AC
	MYL5
	MIR17HG
	TENM3
	NBPF1
	SCGB1B2P
	CTC-246B18.10
	RP11-353N4.6
	RP11-284F21.9
	FGF14-AS2
	CASC15
	RP11-284F21.10
	RP11-54O7.17
	XXbac-BPG252P9.9
	AFAP1-AS1
	RP11-299J3.8
	LL22NC03-N14H11.1
	RP5-1159O4.1
	RP11-440D17.3

## Sheet: Erlotinib
	Responsive genes		gene	locus	promoter				gene	locus	enahncer				gene	locus	TFBS
1	SEMA3F		PRSS21	16:2865376	chr16:2865163-2867163				MYLIP	6:16128866;6:16128870	chr6:16128379-16132359				FOXA2	20:30158796;20:30158827;20:30158833;20:52209733;20:52209735;20:52209749;20:52209756	chr20:30158746-30159036;chr20:52209691-52210379
2	YBX2		MYLIP	6:16128866;6:16128870	chr6:16127316-16129316				CD9	12:6166523;12:6166543;12:6166796;12:6166813;12:6166917;12:6166924;12:6167110;12:6167111;12:6307793;12:6307794;12:6309219;12:6309227;12:6309238;12:6309246;12:6309359;12:6309366;12:6309368;12:6309779;12:6309781	chr12:6166153-6170026;chr12:6307002-6314029				FOXA1	14:50700354;14:62217864;14:62217867;14:62217869;14:62217871;14:62217881;14:70317126;14:70317147;14:74224776;14:74224787;14:74224930	chr14:50700123-50700403;chr14:50700150-50700434;chr14:62217676-62217916;chr14:70316968-70317248;chr14:70316976-70317260;chr14:74224705-74224945
3	ABCC8		CD9	12:6307793;12:6307794;12:6309219;12:6309227;12:6309238;12:6309246;12:6309359;12:6309366;12:6309368	chr12:6307481-6309481				TIMP2	17:78952993;17:78953138;17:78953174;17:78953377	chr17:78951304-78954569				MYC	8:110552614;8:110552621;8:131455373;8:143201205;8:143201212;8:143201213;8:145115962;8:145116011;8:145116032;8:145116033;8:145158414;8:145158432;8:145158434;8:146013229;8:146013230;8:55014844;8:55014848;8:77593249;8:77593275	chr8:110551266-110552967;chr8:110551274-110553027;chr8:110551419-110552985;chr8:110551492-110552994;chr8:110551525-110553038;chr8:110551652-110552893;chr8:110551655-110552873;chr8:110551815-110553091;chr8:110551960-110552671;chr8:110552000-110552662;chr8:110552042-110553112;chr8:110552066-110552681;chr8:110552119-110552887;chr8:110552138-110552659;chr8:110552172-110552772;chr8:110552217-110552627…
4	TNFRSF12A		CAMK2B	7:44366207;7:44366265	chr7:44365230-44367230				CROCC	1:16973009	chr1:16971410-16973362
5	ARHGAP44		PTPRU	1:29562713	chr1:29561027-29563027				FSTL3	19:675844;19:675845	chr19:674880-682624
6	PRSS21		GSTO2	10:106034772	chr10:106032886-106034886				PPP2R2C	4:6564275;4:6564493	chr4:6564258-6564658
7	PAX6		GAL	11:68450043;11:68451377;11:68451383;11:68451918;11:68451933	chr11:68449982-68451982				C3orf18	3:50604609;3:50604742;3:50604757;3:50604763	chr3:50598964-50614009
8	MYLIP		FSTL3	19:674413;19:674442;19:674445;19:675844;19:675845	chr19:674388-676388				LAMA1	18:7117556	chr18:7116996-7118357
9	MGST1		CYBRD1	2:172378846	chr2:172376865-172378865				AMH	19:2252082;19:2475641;19:2478310;19:2478318	chr19:2247129-2254667;chr19:2474623-2480246
10	CD9		CRMP1	4:5893365;4:5896275;4:5896494	chr4:5891953-5893953;chr4:5894810-5896810				HMGB1P1	20:57463708;20:57463711;20:57463713	chr20:57463401-57465600
11	HIVEP2		PPP2R2C	4:6566777	chr4:6565327-6567327				GAMT	19:1401608;19:1401614;19:1401624	chr19:1399495-1402111
12	MRC2		OSBPL6	2:179058471;2:179058547;2:179058573	chr2:179057207-179059207				UBE2M	19:58555177;19:58555334;19:58555534	chr19:58553537-58560688
13	TSPAN9		ATP8B1	18:55470812;18:55470829	chr18:55470327-55472327				LOXL2	8:23084101	chr8:23082967-23085800
14	SEMA3B		MECOM	3:168864286;3:168864292;3:168866759;3:168866773;3:168866785	chr3:168864093-168866093;chr3:168865522-168867522				TRIM29	11:120195963;11:120195966;11:120195969	chr11:120195339-120202709
15	ALOX5		EBF4	20:2672039	chr20:2671523-2673523				TAPBPL	12:6310161	chr12:6307002-6314029
16	CYP24A1		RGS17	6:153453031;6:153453035	chr6:153452389-153454389				IFITM3	11:318269;11:330537;11:331075;11:331189;11:355581;11:355711;11:355724	chr11:311376-318360;chr11:324004-331788;chr11:352202-358026
17	SNAI2		TPTEP1	22:17082038;22:17082042;22:17082046;22:17082048	chr22:17080800-17082800				ANKH	5:14871806;5:14871807;5:14871827	chr5:14868048-14873519
18	CD74		NEFH	22:29875931;22:29875943;22:29875946;22:29875948;22:29875954;22:29875976	chr22:29874180-29876180				PIEZO2	18:11148598;18:11148601;18:11148606;18:11148666;18:11148680	chr18:11147946-11150796
19	SAMD4A		KCTD17	22:37447558;22:37447566;22:37447656	chr22:37445775-37447775				GRHL3	1:24195095;1:24195270;1:24195276	chr1:24195070-24196200
20	PLEKHB1		GALNT16	14:69726314;14:69726319;14:69726320;14:69726421	chr14:69724680-69726680				ANKLE1	19:17346072;19:17346089	chr19:17346002-17349601
21	CPS1		PLCB4	20:9048375;20:9048384;20:9048434;20:9048445;20:9049134;20:9049160;20:9049180;20:9049195	chr20:9047700-9049700				C1orf106	1:200861907	chr1:200861807-200863991
22	NLRP2		MYL9	20:35168933;20:35169720;20:35169721;20:35169777;20:35169784;20:35169799;20:35169800	chr20:35167886-35169886				ANKRD33B	5:10563405;5:10563420;5:10564303;5:10564305	chr5:10562290-10568572
23	SLC45A4		WFDC2	20:44098223;20:44098224;20:44098388	chr20:44096393-44098393				AKR1E2	10:4868328;10:4868329;10:4868331	chr10:4866923-4868556
24	GRAMD1B		LIPG	18:47087077;18:47087083;18:47087103	chr18:47086426-47088426				IGF2	11:2026635;11:2026636;11:2032010	chr11:2026436-2032785
25	ABCC2		RGCC	13:42029810;13:42029836	chr13:42029541-42031541				PCDH7	4:30719695;4:30719730	chr4:30716184-30723392
26	VIM		SCN1B	19:35520351	chr19:35519591-35521591				CLDN7	17:7165023	chr17:7165001-7165201
27	SLAMF7		CAV1	7:116164762;7:116164767;7:116164774;7:116164924	chr7:116162838-116164838;chr7:116163062-116165062;chr7:116164346-116166346;chr7:116164411-116166411				IFITM2	11:355557;11:355581;11:355692;11:355711	chr11:352202-358026
28	LRRC7		COBL	7:51384662;7:51384667	chr7:51384515-51386515				IFITM1	11:315318;11:315319;11:315697;11:318269	chr11:311376-318360
29	TIMP2		LHX2	9:126773247;9:126773256	chr9:126771888-126773888				ISG15	1:984342;1:984343;1:984346	chr1:983847-984599
30	PHLPP2		HIST1H2BJ	6:27101601	chr6:27100575-27102575				HES4	1:921386;1:921395;1:921406	chr1:919181-921600
31	TNC		BMP4	14:54421574	chr14:54421270-54423270
32	AIFM2		HOXD9	2:176986201;2:176986202;2:176987073;2:176987081;2:176987087;2:176987368;2:176987383;2:176987384;2:176987404;2:176987411	chr2:176985412-176987412
33	CAPG		GAMT	19:1401608;19:1401614;19:1401624;19:1402335	chr19:1401569-1403569
34	DSG2		H19	11:2019080;11:2019090;11:2019091;11:2019116;11:2019117;11:2019130;11:2019143;11:2019167;11:2019285;11:2019703;11:2019712;11:2019713;11:2019730;11:2019732	chr11:2019065-2021065
35	COL9A2		RFTN1	3:16555362;3:16555364	chr3:16555222-16557222
36	TNFRSF9		FHOD3	18:33876856;18:33876871;18:33876994	chr18:33875658-33877658
37	PRSS8		COL4A2	13:110958895;13:110958904;13:110958941;13:110958946;13:110958956	chr13:110957630-110959630
38	NNAT		TBX3	12:115121972;12:115121976;12:115121984	chr12:115121969-115123969
39	ATP9A		CYP27A1	2:219646460	chr2:219644471-219646471
40	CAMK2B		GYPC	2:127413505	chr2:127411510-127413510
41	CROCC		SORL1	11:121322727;11:121322737;11:121322738	chr11:121320911-121322911
42	SLC2A3		BRDT	1:92414770;1:92414793	chr1:92412927-92414927
43	YBX3		HERC5	4:89377912;4:89377916;4:89377918;4:89377921;4:89377928;4:89378053	chr4:89376267-89378267
44	PTPRU		DNAJA4	15:78556553;15:78556554;15:78556561;15:78556569;15:78556755;15:78556759;15:78556763;15:78556766;15:78556779;15:78557142;15:78557154;15:78557156;15:78557161;15:78557370;15:78557383	chr15:78554988-78556988;chr15:78556559-78558559
45	BCAT1		THNSL2	2:88469720;2:88469730	chr2:88467813-88469813
46	LTK		PTPRG	3:61546330;3:61546393	chr3:61545242-61547242
47	AHRR		NFKBIZ	3:101567801	chr3:101566357-101568357
48	SPA17		IMPACT	18:22006515	chr18:22004608-22006608
49	ST3GAL6		PRKCA	17:64298868;17:64298874	chr17:64296925-64298925
50	LPAR2		USP25	21:17101988;21:17102000;21:17102009;21:17102020	chr21:17100343-17102343
51	ERBB3		DZIP1L	3:137834708;3:137834712	chr3:137834451-137836451
52	GSTO2		NBL1	1:19969686;1:19969702;1:19969812;1:19970359;1:19971634;1:19971643	chr1:19967722-19969722;chr1:19967902-19969902;chr1:19968207-19970207;chr1:19968666-19970666;chr1:19969865-19971865;chr1:19970259-19972259
53	NGEF		ANKLE1	19:17392385;19:17392419;19:17392429	chr19:17390453-17392453
54	MPPED2		LY6E	8:144098437;8:144098459	chr8:144097901-144099901
55	FGFR2		IGFBP7	4:57976699;4:57976702;4:57976713;4:57976721;4:57976729	chr4:57976551-57978551
56	IFI35		CXCL1	4:74734076;4:74734228;4:74735093;4:74735095	chr4:74733108-74735108
57	MAST4		ANKRD33B	5:10563405;5:10563420;5:10564303;5:10564305	chr5:10562434-10564434
58	KCNAB2		FABP5	8:82192589;8:82192641	chr8:82190717-82192717
59	GAL		AKR1E2	10:4868328;10:4868329;10:4868331	chr10:4866368-4868368
60	TGFBR3		HTRA1	10:124220726;10:124220729;10:124220737	chr10:124219040-124221040
61	FSTL3		VAMP5	2:85811383;2:85811403;2:85811404;2:85811413	chr2:85809530-85811530
62	WIPI1		ROR2	9:94712844;9:94712950	chr9:94712444-94714444
63	NDST1		CTNND2	5:11904162;5:11904167	chr5:11904155-11906155
64	CYBRD1		EMB	5:49737270;5:49737607;5:49737608	chr5:49737234-49739234
65	MPP5		PRKCDBP	11:6341889;11:6341896	chr11:6341740-6343740
66	HMMR		LRRC8E	19:7953321;19:7953329;19:7953335;19:7953340	chr19:7951389-7953389
67	CRMP1		SNTB1	8:121824672;8:121824678;8:121824682	chr8:121824309-121826309
68	PTGS2		DLK1	14:101192860;14:101192871;14:101192895;14:101192914;14:101192925	chr14:101191201-101193201
69	IGF2BP2		2020-03-01	1:220959570;1:220959586	chr1:220958038-220960038
70	PPP2R2C		RDM1	17:34257436;17:34257462;17:34257463;17:34257488	chr17:34257303-34259303
71	ATP2A3		HIST1H2BG	6:26218212	chr6:26216872-26218872
72	SLC24A1		FZD9	7:72847235	chr7:72846108-72848108
	CELSR1
	ADD2
	PLXNA2
	FAP
	RBFOX1
	HOXA9
	OSBPL6
	LXN
	DUSP13
	CROCCP3
	PCDHA6
	ATP8B1
	SERTAD4
	TRAF5
	SEMA5B
	P2RX5
	ZNF671
	GSTP1
	COL16A1
	CD82
	MECOM
	EPDR1
	CEACAM6
	HSD17B14
	TRIP6
	FTL
	TMPRSS11E
	MMP2
	LPCAT2
	NID2
	FER1L4
	C3orf18
	EBF4
	DZANK1
	OTUB2
	FLT3LG
	DLL3
	POU4F3
	ITGA6
	TF
	MYO15A
	APOH
	NLRP1
	RGS17
	CD200
	SLC22A17
	SEMA6A
	PHGDH
	UNC13D
	TGFB2
	MAP3K1
	EPB41L4B
	IFT74
	HSD17B7P2
	PALMD
	MISP
	DDTL
	GSTT2
	MFNG
	SEZ6L
	TPTEP1
	TIMP3
	NEFH
	PDGFB
	APOL1
	KCTD17
	CHGA
	GALNT16
	CD40
	EEF1A2
	PLCB4
	MYL9
	WFDC2
	MAP1LC3A
	LIPG
	LAMA1
	RGCC
	MSLN
	CRISPLD2
	RHBDL1
	SYT17
	TMC5
	IGDCC4
	HOMER2
	FCGRT
	PEX11G
	AMH
	TLE6
	TNNT1
	ETFB
	PLA2G4C
	TMEM59L
	SCN1B
	ZNF85
	CADM4
	TFPI2
	CAV1
	MET
	HOXA3
	ANKRD7
	CPED1
	CPVL
	GRB10
	COBL
	HSPB1
	NPTX2
	PPP1R17
	SERPINE1
	BLVRA
	SLC1A1
	LHX2
	C5
	TLE4
	LHX6
	ELAVL2
	CA9
	INHBA
	TWIST1
	SFTPA1
	BICC1
	DBH
	NMI
	C4BPB
	RAB38
	OBSL1
	HMGB1P1
	SLPI
	TOX2
	MOCS1
	HIST1H2BJ
	MT1G
	DOK4
	EFNB2
	BMP4
	FOSB
	EML2
	FOXA2
	BMP2
	FLRT3
	MCF2L
	HSPA2
	AIF1L
	HIVEP3
	KLF2
	MACF1
	METTL25
	GNG11
	STEAP4
	SGCE
	A4GALT
	DOCK4
	VGF
	FLNC
	HOXD9
	SNRPN
	ARHGAP22
	CGNL1
	IVD
	PALLD
	SOX15
	MMP28
	LRRC6
	AP1M2
	FOXA1
	RNASE1
	GAMT
	BST2
	STK33
	FCHO1
	PGPEP1
	H19
	COL5A1
	UBE2M
	EPS8L1
	C1QL1
	RFTN1
	GFPT2
	ANO1
	KREMEN2
	BARX1
	IQCA1
	SERPINF1
	SEC61G
	LANCL2
	GPR12
	CHI3L1
	EPSTI1
	RARRES3
	C1QTNF6
	MICALCL
	LOXL2
	NOTCH2
	FKBP11
	DTNA
	FHOD3
	SLC43A3
	FADS2
	COL4A2
	DZIP1
	SLC37A2
	CTSL
	TAOK3
	TBX3
	CGA
	EHF
	NHSL1
	HEY2
	PKIB
	CPM
	FAM129A
	CYP27A1
	NEK3
	SPRY2
	LCP1
	SCRN1
	GPNMB
	IL6
	ZDHHC4
	ALPK3
	LIMD2
	GYPC
	GARNL3
	CTSV
	ENPP2
	MYC
	SYTL2
	RAB30
	SULF1
	SORL1
	TMPRSS4
	TRIM29
	THBS1
	UACA
	PAK6
	STRA6
	BRDT
	SLC44A5
	TMEM180
	LOXL4
	SLC40A1
	ARHGAP24
	HERC5
	PRKG2
	NAAA
	ENPEP
	PARVG
	ERP27
	CLSTN3
	TAPBPL
	RBP5
	SLC38A4
	ASCL1
	GALNT6
	DNAJA4
	TPM1
	CLEC18B
	CMTM3
	SLC14A1
	TP53
	TMC6
	RAB40B
	IGFBP4
	FKBP10
	IFITM3
	ATHL1
	APP
	RCN3
	PADI1
	LMO4
	LHX9
	RORC
	CGN
	SCCPDH
	CNIH3
	WNT9A
	SYT2
	DQX1
	MALL
	THNSL2
	CNGA3
	FAM171B
	ACKR3
	PTPRG
	NFKBIZ
	COL8A1
	ALDH1L1
	MUC4
	PDGFC
	PLK2
	CXCL14
	ZNF300
	DOK3
	VWDE
	CSGALNACT1
	ST18
	CER1
	PLIN2
	PTGES
	LCN2
	ANKRD1
	ADAM12
	ADM
	HSD17B12
	SERPINH1
	SLX4IP
	P4HA3
	CSRP2BP
	FEZ1
	DOC2A
	CDH8
	HNMT
	LYPD1
	VEGFC
	PPP1R1C
	THRB
	KCTD14
	AKR1C2
	ADAM8
	ACSL1
	GFRA1
	SCHIP1
	GUCY1A2
	TRIM36
	GJA1
	PRDM8
	STK32B
	LINC00467
	NMRAL1
	ADPRHL1
	CMTM7
	MSI2
	HS3ST3A1
	IMPACT
	ANKRD29
	CHST9
	ANKH
	ROBO3
	FAM134B
	CDH12
	PRKCA
	C4orf19
	UCHL1
	FAM167A
	CXADR
	C21orf91
	PDE1C
	PIEZO2
	RAB6B
	ACSS1
	VOPP1
	USP25
	CDK20
	SH3RF2
	HKDC1
	MMP14
	CLEC18A
	CLEC18C
	CACNA2D3
	SLC34A2
	RADIL
	GRHL3
	DZIP1L
	RHBDL2
	FAM86C1
	TAGLN2
	NBL1
	APOA2
	TNNI1
	RUNX1
	IGF2BP1
	SIM2
	ARHGAP27
	TPPP3
	ZNF235
	ANKLE1
	TFF3
	TFF1
	TMPRSS3
	S100A1
	SHC1
	LY6E
	ZNF382
	ITGA5
	ZNF385A
	CXCL16
	TNFSF13
	PDZK1IP1
	RBP7
	FBLIM1
	NTNG1
	HENMT1
	AKNAD1
	GFI1
	VANGL2
	KLHDC8A
	SLC16A14
	SGPP2
	ANKRD23
	S100A9
	ALPP
	ALPPL2
	GPR155
	C1orf106
	IGFBP7
	FBLN2
	SERPINI1
	PTX3
	IL17RE
	CXCL3
	CXCL5
	CXCL1
	TM4SF18
	GRIK3
	RPL39L
	PITX2
	HAND2
	ANXA5
	HPGD
	FAM160A1
	EDIL3
	ANKRD33B
	CMBL
	C5orf63
	SPINK1
	SERINC5
	CITED2
	DCBLD1
	TMEM200A
	STEAP1
	FABP5
	ADCY1
	NUDT2
	DIRAS2
	GJB2
	AKR1E2
	DRGX
	DACT1
	SLC18A2
	DACH1
	ANKRD2
	PACSIN3
	HTRA1
	AMN
	ALKBH3
	CYB5R2
	TRIM66
	SPDYE6
	ANPEP
	ELFN2
	UGT1A6
	ZNF91
	IGF2
	ZNF229
	JSRP1
	CORO6
	ZNF528
	AXL
	SPINT2
	DNAAF3
	LY6D
	NXN
	FAM57A
	SRR
	KLK5
	KLK6
	KRT80
	TMC8
	NAALADL1
	GNG4
	CMAHP
	SCNN1B
	SDPR
	COL3A1
	TSPAN5
	FSTL5
	SFTPB
	VAMP5
	COL4A3
	KLK7
	ROR2
	CPT1C
	ADRB2
	B3GALNT1
	STK32A
	RASSF6
	COL22A1
	SDC2
	ANTXR1
	MT1E
	PCDH7
	CTNND2
	TM4SF4
	KLF13
	NLGN2
	TMEM154
	FOS
	SEMA3E
	KRT86
	KISS1
	COX7B2
	EMB
	RASA4B
	GPR37
	SDR16C5
	MTSS1
	ZNF415
	PRKCDBP
	LRRC8E
	LRG1
	KRT19
	KRT13
	KRT20
	PTGER4
	FGG
	FGA
	ZIK1
	RP11-443P15.2
	MLLT3
	MAL
	SERF1A
	SLFN12
	SNTB1
	ATOH1
	SPTLC3
	C2orf54
	MUCL1
	SMPDL3A
	ZNF596
	CES3
	DHCR7
	GLRX
	SYT12
	DMRT2
	SNCG
	NDNF
	OLR1
	SNX33
	NABP1
	CCDC106
	MUC13
	AP000769.1
	CLDN7
	RP11-69E11.4
	SGK223
	KCNJ14
	SATB1
	EPGN
	NDN
	SLC35D3
	SLC8A1
	CAMK1D
	GAS6
	GPC6
	CALN1
	FAM3B
	DUSP5P1
	HIST2H4A
	NPW
	ALDH1A3
	CCSER1
	PKP3
	POU3F2
	TMEM255B
	SLITRK6
	CLDN6
	ROBO2
	FLRT2
	AQP12B
	IFITM2
	TNFAIP2
	ROR1
	MUC1
	L3MBTL1
	DLK1
	EP400NL
	IFITM1
	RASA3
	2021-03-01
	GABRA5
	AKR1C1
	BCAM
	RDM1
	COL4A1
	ISG15
	SAMD11
	TMSB4XP8
	HIST1H1C
	PALM3
	DMBT1
	HIST1H2BG
	ARL4C
	RAB42
	AGRN
	FAM25C
	HES4
	IGFL1
	ZP3
	CERKL
	NCCRP1
	COL25A1
	TEKT4P2
	FAM221A
	BCL2L15
	FZD9
	TMSB4XP2
	KLRG2
	RELN
	S100A13
	SYCP2
	PLEKHG4
	SRGAP3
	ZNF836
	STK31
	EVL
	NPIPB15
	ZNF605
	SPTSSB

[truncated: 2 more sheets: Canertinib, Afatinib]
